# Supplementary material for: Identification and Validation of a Novel DNA Damage and DNA Repair Related Genes Based Signature for Colon Cancer Prognosis
Source: Front Genet. 2021 Feb 24;12:635863. doi: 10.3389/fgene.2021.635863 (PMC7943631; doi:10.3389/fgene.2021.635863)
Supplement: Supplementary Table 1 — The information of 1545 genes related to DNA damage and repair. [file Table_1.xlsx]

## Sheet: DNA  repair
name	genes	description	collections	organism	contributor
AMBROSINI_FLAVOPIRIDOL_TREATMENT_TP53	108	Genes down-regulated by flavopiridol [PubChem=5287969] in the HCT116 cells (colon cancer) depending on their TP53 [GeneID=7157] status: wild-type vs loss of the gene's function (LOF).	C2 CGP	Homo sapiens	MSigDB Team
BIOCARTA_ATM_PATHWAY	20	ATM Signaling Pathway	C2 CP	Homo sapiens	BioCarta
BIOCARTA_ATRBRCA_PATHWAY	22	Role of BRCA1, BRCA2 and ATR in Cancer Susceptibility	C2 CP	Homo sapiens	BioCarta
BIOCARTA_RB_PATHWAY	13	RB Tumor Suppressor/Checkpoint Signaling in response to DNA damage	C2 CP	Homo sapiens	BioCarta
BIOCARTA_SET_PATHWAY	10	Granzyme A mediated Apoptosis Pathway	C2 CP	Homo sapiens	BioCarta
CASORELLI_ACUTE_PROMYELOCYTIC_LEUKEMIA_DMIA_DN	669	Genes down-regulated in APL (acute promyeolocytic leukemia) blasts expressing PML-RARA fusion [GeneID=5371;5914] compared to normal promyeloblasts.	C2 CGP	Homo sapiens	MSigDB Team
CASORELLI_ACUTE_PROMYELOCYTIC_LEUKEMIA_UMIA_UP	173	Genes up-regulated in APL (acute promyeolocytic leukemia) blasts expressing PML-RARA fusion [GeneID=5371;5914] compared to normal promyeloblasts.	C2 CGP	Homo sapiens	MSigDB Team
CASORELLI_APL_SECONDARY_VS_DE_NOVO_DN	4	Genes down-regulated in secondary APL (acute promyelocytic leukemia) compared to the de novo tumors.	ARCHIVED C2_CGP	Homo sapiens	MSigDB Team
CASORELLI_APL_SECONDARY_VS_DE_NOVO_UP	39	Genes up-regulated in secondary APL (acute promyelocytic leukemia) compared to the de novo tumors.	C2 CGP	Homo sapiens	MSigDB Team
COLLIS_PRKDC_REGULATORS	13	Proteins that regulate activity of PRKDC [GeneID=5591].	C2 CGP	Homo sapiens	MSigDB Team
COLLIS_PRKDC_SUBSTRATES	17	Substrates of PRKDC [GeneID=5591].	C2 CGP	Homo sapiens	MSigDB Team
DACOSTA_ERCC3_ALLELE_XPCS_VS_TTD_DN	34	Genes down-regulated in fibroblasts expressing different mutant forms of ERCC3 [GeneID=2071]: XP/CS (xeroderma pigmentosum (XP) and Cockraine's syndrome (CS)) vs TTD (trichothiodystrophy).	C2 CGP	Homo sapiens	MSigDB Team
DACOSTA_ERCC3_ALLELE_XPCS_VS_TTD_UP	28	Genes up-regulated in fibroblasts expressing different mutant forms of ERCC3 [GeneID=2071]: XP/CS (xeroderma pigmentosum (XP) and Cockraine's syndrome (CS)) vs TTD (trichothiodystrophy).	C2 CGP	Homo sapiens	MSigDB Team
DACOSTA_LOW_DOSE_UV_RESPONSE_VIA_ERCC3_XCC3_XPCS_DN	9	Genes down-regulated in fibroblasts expressing the XP/CS mutant form of ERCC3 [GeneID=2071], after low dose UVC irradiation.	C2 CGP	Homo sapiens	MSigDB Team
DACOSTA_LOW_DOSE_UV_RESPONSE_VIA_ERCC3_XCC3_XPCS_UP	14	Genes up-regulated in fibroblasts expressing the XP/CS mutant form of ERCC3 [GeneID=2071], after low dose UVC irradiation.	C2 CGP	Homo sapiens	MSigDB Team
DACOSTA_UV_RESPONSE_VIA_ERCC3_COMMON_DN	466	Common down-regulated transcripts in fibroblasts expressing either XP/CS or TDD mutant forms of ERCC3 [GeneID=2071], after UVC irradiation.	C2 CGP	Homo sapiens	MSigDB Team
DACOSTA_UV_RESPONSE_VIA_ERCC3_COMMON_UP	75	Common up-regulated transcripts in fibroblasts expressing either XP/CS or TDD mutant forms of ERCC3 [GeneID=2071], after UVC irradiation.	C2 CGP	Homo sapiens	MSigDB Team
DACOSTA_UV_RESPONSE_VIA_ERCC3_DN	856	Genes down-regulated in fibroblasts expressing mutant forms of ERCC3 [GeneID=2071] after UV irradiation.	C2 CGP	Homo sapiens	MSigDB Team
DACOSTA_UV_RESPONSE_VIA_ERCC3_TTD_DN	84	Genes exclusively down-regulated in fibroblasts expressing the TTD mutant form of ERCC3 [GeneID=2071], after UVC irradiation.	C2 CGP	Homo sapiens	MSigDB Team
DACOSTA_UV_RESPONSE_VIA_ERCC3_TTD_UP	59	Genes exclusively up-regulated in fibroblasts expressing the TTD mutant form of ERCC3 [GeneID=2071], after UVC irradiation.	C2 CGP	Homo sapiens	MSigDB Team
DACOSTA_UV_RESPONSE_VIA_ERCC3_UP	316	Genes up-regulated in fibroblasts expressing mutant forms of ERCC3 [GeneID=2071] after UV irradiation.	C2 CGP	Homo sapiens	MSigDB Team
DACOSTA_UV_RESPONSE_VIA_ERCC3_XPCS_DN	85	Genes exclusively down-regulated in fibroblasts expressing the XP/CS mutant form of ERCC3 [GeneID=2071] after high dose UVC irradiation.	C2 CGP	Homo sapiens	MSigDB Team
DACOSTA_UV_RESPONSE_VIA_ERCC3_XPCS_UP	25	Genes exclusively up-regulated in fibroblasts expressing the XP/CS mutant form of ERCC3 [GeneID=2071] after high dose UVC irradiation.	C2 CGP	Homo sapiens	MSigDB Team
DEBIASI_APOPTOSIS_BY_REOVIRUS_INFECTION_TION_DN	276	Genes down-regulated in HEK293 cells (embryonic kidney) at 6 h, 12 h or 24 h after infection with reovirus strain T3A (known as a strong inducer of apoptosis).	C2 CGP	Homo sapiens	University of Washington
DEBIASI_APOPTOSIS_BY_REOVIRUS_INFECTION_TION_UP	300	Genes up-regulated in HEK293 cells (embryonic kidney) at 6 h, 12 h or 24 h after infection with reovirus strain T3A (known as a strong inducer of apoptosis).	C2 CGP	Homo sapiens	University of Washington
DING_LUNG_CANCER_BY_MUTATION_RATE	20	The lung adenocarcinoma TSP (tumor sequencing project) genes mutations in which show positive correlation with the higher overall mutation rate.	C2 CGP	Homo sapiens	MSigDB Team
DING_LUNG_CANCER_EXPRESSION_BY_COPY_NUMBER	100	The lung adenocarcinoma TSP (tumor sequencing project) genes showing strong correlation between DNA copy number variation and gene expression.	C2 CGP	Homo sapiens	MSigDB Team
DING_LUNG_CANCER_MUTATED_FREQUENTLY	12	The lung adenocarcinoma TSP (tumor sequencing project) genes with significantly higher frequencies of nonsense, splice site, and frame-shift mutations.	C2 CGP	Homo sapiens	MSigDB Team
DING_LUNG_CANCER_MUTATED_RECURRENTLY	6	The lung adenocarcinoma TSP (tumor sequencing project) genes bearing recurrent somatic mutations.	C2 CGP	Homo sapiens	MSigDB Team
DING_LUNG_CANCER_MUTATED_SIGNIFICANTLY	26	The lung adenocarcinoma TSP (tumor sequencing project) genes that were found significantly mutated by at least one method.	C2 CGP	Homo sapiens	MSigDB Team
DODD_NASOPHARYNGEAL_CARCINOMA_DN	1402	Genes down-regulated in nasopharyngeal carcinoma (NPC) compared to the normal tissue.	C2 CGP	Homo sapiens	MSigDB Team
DODD_NASOPHARYNGEAL_CARCINOMA_UP	1806	Genes up-regulated in nasopharyngeal carcinoma (NPC) compared to the normal tissue.	C2 CGP	Homo sapiens	MSigDB Team
FERREIRA_EWINGS_SARCOMA_UNSTABLE_VS_STABLE_DN	96	Genes down-regulated in genomically unstable Ewing's sarcoma tumors compared to the stable ones.	C2 CGP	Homo sapiens	MSigDB Team
FERREIRA_EWINGS_SARCOMA_UNSTABLE_VS_STABLE_UP	163	Genes up-regulated in genomically unstable Ewing's sarcoma tumors compared to the stable ones.	C2 CGP	Homo sapiens	MSigDB Team
FU_INTERACT_WITH_ALKBH8	13	Proteins identified by mass spectrometry in complexes containing ALKBH8 [GeneID=91801].	C2 CGP	Homo sapiens	MSigDB Team
GCM_APEX1	114	Neighborhood of APEX1	C4 CGN	Homo sapiens	MSigDB Team
GNF2_APEX1	92	Neighborhood of APEX1	C4 CGN	Homo sapiens	MSigDB Team
GO_DNA_APURINIC_OR_APYRIMIDINIC_SITE_ENDONUCLEASE_ACTIVITY	13	Catalysis of the cleavage of the C-O-P bond in the AP site created when DNA glycosylase removes a damaged base, involved in the DNA base excision repair pathway (BER). [Wikipedia:AP_endonuclease]	C5 GO	Homo sapiens	Gene Ontology Consortium
GO_DNA_REPAIR	563	The process of restoring DNA after damage. Genomes are subject to damage by chemical and physical agents in the environment (e.g. UV and ionizing radiations, chemical mutagens, fungal and bacterial toxins, etc.) and by free radicals or alkylating agents endogenously generated in metabolism. DNA is also damaged because of errors during its replication. A variety of different DNA repair pathways ha…	C5 GO	Homo sapiens	Gene Ontology Consortium
GO_DNA_REPAIR_COMPLEX	40	A protein complex involved in DNA repair processes including direct reversal, base excision repair, nucleotide excision repair, photoreactivation, bypass, double-strand break repair pathway, and mismatch repair pathway. [GOC:bhm, PMID:17217467, PMID:20551348, PMID:22749910, PMID:24192350]	C5 GO	Homo sapiens	Gene Ontology Consortium
GO_DNA_REPAIR_COMPLEX_ASSEMBLY	6	The aggregation, arrangement and bonding together of a set of components to form a DNA repair complex. [GOC:pg, PMID:27113759, PMID:27233470]	C5 GO	Homo sapiens	Gene Ontology Consortium
GO_DOUBLE_STRAND_BREAK_REPAIR	262	The repair of double-strand breaks in DNA via homologous and nonhomologous mechanisms to reform a continuous DNA helix. [GOC:elh]	C5 GO	Homo sapiens	Gene Ontology Consortium
GO_DOUBLE_STRAND_BREAK_REPAIR_INVOLVED_IN_MEIOTIC_RECOMBINATION	5	The repair of double-strand breaks in DNA via homologous and nonhomologous mechanisms to reform a continuous DNA helix that contributes to reciprocal meiotic recombination. [GOC:mah, PMID:15238514]	C5 GO	Homo sapiens	Gene Ontology Consortium
GO_DOUBLE_STRAND_BREAK_REPAIR_VIA_SYNTHESIS_DEPENDENT_STRAND_ANNEALING	9	SDSA is a major mechanism of double-strand break repair in mitosis which allows for the error-free repair of a double-strand break without the exchange of adjacent sequences. The broken DNA searches for and base pairs with a homologous region in an intact chromosome. DNA synthesis initiates from the 3' end of the invading DNA strand, using the intact chromosome as the template. Newly synthesized …	C5 GO	Homo sapiens	Gene Ontology Consortium
GO_EPSILON_DNA_POLYMERASE_COMPLEX	5	A heterotetrameric DNA polymerase complex that catalyzes processive DNA synthesis in the absence of PCNA, but is further stimulated in the presence of PCNA. The complex contains a large catalytic subunit and three small subunits, and is best characterized in Saccharomyces, in which the subunits are named Pol2p, Dpb2p, Dpb3p, and Dpb4p. Some evidence suggests that DNA polymerase epsilon is the lea…	C5 GO	Homo sapiens	Gene Ontology Consortium
GO_GLOBAL_GENOME_NUCLEOTIDE_EXCISION_REPAIR	26	The nucleotide-excision repair process in which DNA lesions are removed from nontranscribed strands and from transcriptionally silent regions over the entire genome. [PMID:10197977, PMID:18794354]	C5 GO	Homo sapiens	Gene Ontology Consortium
GO_MISMATCH_REPAIR	38	A system for the correction of errors in which an incorrect base, which cannot form hydrogen bonds with the corresponding base in the parent strand, is incorporated into the daughter strand. The mismatch repair system promotes genomic fidelity by repairing base-base mismatches, insertion-deletion loops and heterologies generated during DNA replication and recombination. [ISBN:0198506732, PMID:116…	C5 GO	Homo sapiens	Gene Ontology Consortium
GO_MRE11_COMPLEX	7	Trimeric protein complex that possesses endonuclease activity; involved in meiotic recombination, DNA repair and checkpoint signaling. In Saccharomyces cerevisiae, the complex comprises Mre11p, Rad50p, and Xrs2p; complexes identified in other species generally contain proteins orthologous to the Saccharomyces cerevisiae proteins. [GOC:mah, GOC:vw, PMID:11988766, PMID:17674145]	C5 GO	Homo sapiens	Gene Ontology Consortium
GO_NON_RECOMBINATIONAL_REPAIR	104	A DNA repair process in which that does not require the exchange of genetic material between the broken DNA molecule and a homologous region of DNA. [GOC:elh]	C5 GO	Homo sapiens	Gene Ontology Consortium
GO_NONHOMOLOGOUS_END_JOINING_COMPLEX	9	A protein complex that plays a role in DNA double-strand break repair via nonhomologous end joining. Such complexes typically contain a specialized DNA ligase (e.g. Lig4 in eukaryotes) and one or more proteins that bind to DNA ends. [GOC:mah, PMID:17072889, PMID:17938628]	C5 GO	Homo sapiens	Gene Ontology Consortium
GO_NUCLEOTIDE_EXCISION_REPAIR	110	A DNA repair process in which a small region of the strand surrounding the damage is removed from the DNA helix as an oligonucleotide. The small gap left in the DNA helix is filled in by the sequential action of DNA polymerase and DNA ligase. Nucleotide excision repair recognizes a wide range of substrates, including damage caused by UV irradiation (pyrimidine dimers and 6-4 photoproducts) and ch…	C5 GO	Homo sapiens	Gene Ontology Consortium
GO_NUCLEOTIDE_EXCISION_REPAIR_DNA_DAMAGE_RECOGNITION	23	The identification of lesions in DNA, such as pyrimidine-dimers, intrastrand cross-links, and bulky adducts. The wide range of substrate specificity suggests the repair complex recognizes distortions in the DNA helix. [GOC:elh, PMID:10197977]	C5 GO	Homo sapiens	Gene Ontology Consortium
GO_NUCLEOTIDE_EXCISION_REPAIR_DNA_GAP_FILLING	23	Repair of the gap in the DNA helix by DNA polymerase and DNA ligase after the portion of the strand containing the lesion has been removed by pyrimidine-dimer repair enzymes. [ISBN:0815316194]	C5 GO	Homo sapiens	Gene Ontology Consortium
GO_RECOMBINATIONAL_REPAIR	140	A DNA repair process that involves the exchange, reciprocal or nonreciprocal, of genetic material between the broken DNA molecule and a homologous region of DNA. [GOC:elh]	C5 GO	Homo sapiens	Gene Ontology Consortium
GO_REGULATION_OF_DOUBLE_STRAND_BREAK_REPAIR_VIA_HOMOLOGOUS_RECOMBINATION	47	Any process that modulates the frequency, rate or extent of the error-free repair of a double-strand break in DNA in which the broken DNA molecule is repaired using homologous sequences. [GOC:dph, GOC:jp, GOC:tb]	C5 GO	Homo sapiens	Gene Ontology Consortium
GO_REPLICATION_BORN_DOUBLE_STRAND_BREAK_REPAIR_VIA_SISTER_CHROMATID_EXCHANGE	8	The repair of a replication-born double-strand DNA break in which the DNA molecule is repaired using the homologous sequence of the sister chromatid which serves as a template to repair the breaks. [GOC:rb, PMID:12820977, PMID:16888651]	C5 GO	Homo sapiens	Gene Ontology Consortium
GO_SITE_OF_DNA_DAMAGE	82	A region of a chromosome at which DNA damage has occurred. DNA damage signaling and repair proteins accumulate at the lesion to respond to the damage and repair the DNA to form a continuous DNA helix. [GOC:pg]	C5 GO	Homo sapiens	Gene Ontology Consortium
GO_SITE_OF_DOUBLE_STRAND_BREAK	61	A region of a chromosome at which a DNA double-strand break has occurred. DNA damage signaling and repair proteins accumulate at the lesion to respond to the damage and repair the DNA to form a continuous DNA helix. [GOC:bf, GOC:mah, GOC:vw, PMID:20096808, PMID:21035408]	C5 GO	Homo sapiens	Gene Ontology Consortium
GO_TRANSCRIPTION_COUPLED_NUCLEOTIDE_EXCISION_REPAIR	73	The nucleotide-excision repair process that carries out preferential repair of DNA lesions on the actively transcribed strand of the DNA duplex. In addition, the transcription-coupled nucleotide-excision repair pathway is required for the recognition and repair of a small subset of lesions that are not recognized by the global genome nucleotide excision repair pathway. [PMID:10197977, PMID:119002…	C5 GO	Homo sapiens	Gene Ontology Consortium
GO_UV_DAMAGE_EXCISION_REPAIR	13	A DNA repair process that is initiated by an endonuclease that introduces a single-strand incision immediately 5' of a UV-induced damage site. UV-damage excision repair acts on both cyclobutane pyrimidine dimers (CPDs) and pyrimidine-pyrimidone 6-4 photoproducts (6-4PPs). [GOC:mah, PMID:9619100]	C5 GO	Homo sapiens	Gene Ontology Consortium
HONRADO_BREAST_CANCER_BRCA1_VS_BRCA2	16	Genes distinguishing between breast cancer tumors bearing mutations in BRCA1 [GeneID=672] and those with mutated BRCA2 [GeneID=675].	C2 CGP	Homo sapiens	MSigDB Team
HP_ABNORMALITY_OF_DNA_REPAIR	17	Abnormality of DNA repair	C5 HPO	Homo sapiens	The Jackson Laboratory (JAX)
HP_DEFECTIVE_DNA_REPAIR_AFTER_ULTRAVIOLET_RADIATION_DAMAGE	13	Defective DNA repair after ultraviolet radiation damage	C5 HPO	Homo sapiens	The Jackson Laboratory (JAX)
KANNAN_TP53_TARGETS_DN	22	Primary down-regulated targets of TP53 [GeneID=7157] in the H1299 (lung cancer) cell line.	C2 CGP	Homo sapiens	MSigDB Team
KANNAN_TP53_TARGETS_UP	58	Primary up-regulated targets of TP53 [GeneID=7157] in the H1299 (lung cancer) cell line.	C2 CGP	Homo sapiens	MSigDB Team
KAUFFMANN_DNA_REPAIR_GENES	230	Genes involved in DNA repair, compiled manually by the authors.	C2 CGP	Homo sapiens	MSigDB Team
KAUFFMANN_DNA_REPLICATION_GENES	146	Genes involved in DNA replication, compiled manually by the authors.	C2 CGP	Homo sapiens	MSigDB Team
KAUFFMANN_MELANOMA_RELAPSE_DN	6	DNA repair and replication genes down-regulated in melanoma patients who will relapse vs patients who will not.	C2 CGP	Homo sapiens	MSigDB Team
KAUFFMANN_MELANOMA_RELAPSE_UP	61	DNA repair and replication genes up-regulated in melanoma patients who will relapse vs patients who will not.	C2 CGP	Homo sapiens	MSigDB Team
KEGG_BASE_EXCISION_REPAIR	35	Base excision repair	C2 CP	Homo sapiens	Kyoto Encyclopedia of Genes and Genomes
KEGG_COLORECTAL_CANCER	62	Colorectal cancer	C2 CP	Homo sapiens	Kyoto Encyclopedia of Genes and Genomes
KEGG_HOMOLOGOUS_RECOMBINATION	28	Homologous recombination	C2 CP	Homo sapiens	Kyoto Encyclopedia of Genes and Genomes
KEGG_MISMATCH_REPAIR	23	Mismatch repair	C2 CP	Homo sapiens	Kyoto Encyclopedia of Genes and Genomes
KEGG_NUCLEOTIDE_EXCISION_REPAIR	44	Nucleotide excision repair	C2 CP	Homo sapiens	Kyoto Encyclopedia of Genes and Genomes
KEGG_P53_SIGNALING_PATHWAY	68	p53 signaling pathway	C2 CP	Homo sapiens	Kyoto Encyclopedia of Genes and Genomes
LU_AGING_BRAIN_DN	153	Age down-regulated genes in the human frontal cortex.	C2 CGP	Homo sapiens	University of Washington
LU_AGING_BRAIN_UP	262	Age up-regulated genes in the human frontal cortex.	C2 CGP	Homo sapiens	University of Washington
MATHEW_FANCONI_ANEMIA_GENES	11	Genes identified with the Fanconi anemia (FA) and the FA pathway.	C2 CGP	Homo sapiens	MSigDB Team
MENSSEN_MYC_TARGETS	0	Genes up-regulated by adenoviral expression of c-MYC [GeneID=4609] in HUVEC cells (umbilical vein endothelium).	ARCHIVED C2_CGP	Homo sapiens	Broad Institute
MURAKAMI_UV_RESPONSE_1HR_DN	10	Genes down-regulated in primary keratinocytes at 1 h after UVB irradiation.	C2 CGP	Homo sapiens	MSigDB Team
MURAKAMI_UV_RESPONSE_1HR_UP	15	Genes up-regulated in primary keratinocytes at 1 h after UVB irradiation.	C2 CGP	Homo sapiens	MSigDB Team
MURAKAMI_UV_RESPONSE_24HR	20	Genes down-regulated in primary keratinocytes at 24 h after UVB irradiation.	C2 CGP	Homo sapiens	University of Washington
MURAKAMI_UV_RESPONSE_6HR_DN	21	Genes down-regulated in primary keratinocytes at 6 h after UVB irradiation.	C2 CGP	Homo sapiens	University of Washington
MURAKAMI_UV_RESPONSE_6HR_UP	34	Genes up-regulated in primary keratinocytes at 6 h after UVB irradiation.	C2 CGP	Homo sapiens	University of Washington
NATSUME_RESPONSE_TO_INTERFERON_BETA_DN	51	Genes down-regulated in T98 cells (glioma) 48 h after treatment with interferon beta.	C2 CGP	Homo sapiens	University of Washington
NATSUME_RESPONSE_TO_INTERFERON_BETA_UP	70	Genes up-regulated in T98 cells (glioma) 48 h after treatment with interferon beta.	C2 CGP	Homo sapiens	University of Washington
REACTOME_DISEASES_OF_DNA_REPAIR	10	Diseases of DNA repair	C2 CP	Homo sapiens	Reactome
REACTOME_DNA_DOUBLE_STRAND_BREAK_REPAIR	166	DNA Double-Strand Break Repair	C2 CP	Homo sapiens	Reactome
REACTOME_DNA_REPAIR	331	DNA Repair	C2 CP	Homo sapiens	Reactome
REACTOME_GAP_FILLING_DNA_REPAIR_SYNTHESIS_AND_LIGATION_IN_GG_NER	25	Gap-filling DNA repair synthesis and ligation in GG-NER	C2 CP	Homo sapiens	Reactome
REACTOME_REPAIR_SYNTHESIS_FOR_GAP_FILLING_BY_DNA_POL_IN_TC_NER	14	Genes involved in Repair synthesis for gap-filling by DNA polymerase in TC-NER	ARCHIVED C2_CP C2_CP:REACTOME	Homo sapiens	Reactome
REACTOME_SUMOYLATION_OF_DNA_DAMAGE_RESPONSE_AND_REPAIR_PROTEINS	77	SUMOylation of DNA damage response and repair proteins	C2 CP	Homo sapiens	Reactome
REACTOME_TP53_REGULATES_TRANSCRIPTION_OF_DNA_REPAIR_GENES	62	TP53 Regulates Transcription of DNA Repair Genes	C2 CP	Homo sapiens	Reactome
REN_BOUND_BY_E2F	62	Genes whose promoters were bound by E2F1 and E2F4 [GeneID=1869;1874] in the primary fibroblasts WI-38, by ChIP on chip assay.	C2 CGP	Homo sapiens	Broad Institute
SCHAVOLT_TARGETS_OF_TP53_AND_TP63	15	Genes up-regulated by TP53 [GeneID=7157] and down-regulated by an isoform of TP63 [GeneID=8626] in primary HEK cells (epidermal keratinocytes).	C2 CGP	Homo sapiens	MSigDB Team
TCGA_GLIOBLASTOMA_COPY_NUMBER_DN	31	Genes down-regulated and displaying decreased copy number in glioblastoma samples.	C2 CGP	Homo sapiens	MSigDB Team
TCGA_GLIOBLASTOMA_COPY_NUMBER_UP	75	Genes up-regulated and displaying increased copy number in glioblastoma samples.	C2 CGP	Homo sapiens	MSigDB Team
TCGA_GLIOBLASTOMA_MUTATED	8	Genes significantly mutated in 91 glioblastoma samples.	C2 CGP	Homo sapiens	MSigDB Team
TSAI_RESPONSE_TO_IONIZING_RADIATION	150	Genes up-regulated in TK6, WTK1, and NH32 cell lines (lymphoblast) in response to ionizing radiation.	C2 CGP	Homo sapiens	MSigDB Team
WAKASUGI_HAVE_ZNF143_BINDING_SITES	54	DNA repair genes whose promoters contain putative ZNF143 [GeneID=7702] binding sites.	C2 CGP	Homo sapiens	MSigDB Team
WANG_CISPLATIN_RESPONSE_AND_XPC_DN	219	Genes down-regulated in fibroblasts with defective XPC [GeneID=7508] in response to cisplatin [PubChem=2767].	C2 CGP	Homo sapiens	University of Washington
WANG_CISPLATIN_RESPONSE_AND_XPC_UP	185	Genes up-regulated in fibroblasts with defective XPC [GeneID=7508] in response to cisplatin [PubChem=2767].	C2 CGP	Homo sapiens	University of Washington
WATANABE_COLON_CANCER_MSI_VS_MSS_DN	69	Down-regulated genes discriminating between MSI (microsatellite instability) and MSS (microsatellite stability) colon cancers.	C2 CGP	Homo sapiens	MSigDB Team
WATANABE_COLON_CANCER_MSI_VS_MSS_UP	29	Up-regulated genes discriminating between MSI (microsatellite instability) and MSS (microsatellite stability) colon cancers.	C2 CGP	Homo sapiens	MSigDB Team
WP_DNA_MISMATCH_REPAIR	23	DNA Mismatch Repair	C2 CP	Homo sapiens	WikiPathways
ZHANG_RESPONSE_TO_CANTHARIDIN_DN	67	Genes down-regulated in HL-60 cells (promyeloid leukemia) by cantharidin [PubChem=6708701].	C2 CGP	Homo sapiens	University of Washington
ZHANG_RESPONSE_TO_CANTHARIDIN_UP	15	Genes up-regulated in HL-60 cells (promyeloid leukemia) by cantharidin [PubChem=6708701].	C2 CGP	Homo sapiens	University of Washington

## Sheet: DNA damage
name	# genes	description	collections	organism	contributor
AMBROSINI_FLAVOPIRIDOL_TREATMENT_TP53	108	Genes down-regulated by flavopiridol [PubChem=5287969] in the HCT116 cells (colon cancer) depending on their TP53 [GeneID=7157] status: wild-type vs loss of the gene's function (LOF).	C2 CGP	Homo sapiens	MSigDB Team
BIOCARTA_ATM_PATHWAY	20	ATM Signaling Pathway	C2 CP	Homo sapiens	BioCarta
BIOCARTA_ATRBRCA_PATHWAY	22	Role of BRCA1, BRCA2 and ATR in Cancer Susceptibility	C2 CP	Homo sapiens	BioCarta
BIOCARTA_CDC25_PATHWAY	9	cdc25 and chk1 Regulatory Pathway in response to DNA damage	C2 CP	Homo sapiens	BioCarta
BIOCARTA_CHEMICAL_PATHWAY	18	Apoptotic Signaling in Response to DNA Damage	C2 CP	Homo sapiens	BioCarta
BIOCARTA_G2_PATHWAY	24	Cell Cycle: G2/M Checkpoint	C2 CP	Homo sapiens	BioCarta
BIOCARTA_P53_PATHWAY	16	p53 Signaling Pathway	C2 CP	Homo sapiens	BioCarta
BIOCARTA_P53HYPOXIA_PATHWAY	21	Hypoxia and p53 in the Cardiovascular system	C2 CP	Homo sapiens	BioCarta
BIOCARTA_PML_PATHWAY	17	Regulation of transcriptional activity by PML	C2 CP	Homo sapiens	BioCarta
BIOCARTA_RB_PATHWAY	13	RB Tumor Suppressor/Checkpoint Signaling in response to DNA damage	C2 CP	Homo sapiens	BioCarta
COLLIS_PRKDC_REGULATORS	13	Proteins that regulate activity of PRKDC [GeneID=5591].	C2 CGP	Homo sapiens	MSigDB Team
COLLIS_PRKDC_SUBSTRATES	17	Substrates of PRKDC [GeneID=5591].	C2 CGP	Homo sapiens	MSigDB Team
CROSBY_E2F4_TARGETS	6	Putative E2F4 [GeneID=1874] target genes identified as mitotic genes down-regulated in the LNCaP C4-2 cells (prostate cancer) at both 6 and 24 h following irradiation.	C2 CGP	Homo sapiens	MSigDB Team
EGUCHI_CELL_CYCLE_RB1_TARGETS	22	RB1 [GeneID=5925] target genes involved in cell cycle regulation: genes down-regulated by doxorubicin [PubChem=31703] only in cells expressing RB1.	C2 CGP	Homo sapiens	MSigDB Team
EHLERS_ANEUPLOIDY_DN	12	Down-regulated genes in the expression signature of aneuploidy in uveal melanoma tumors: low vs high aneuploidy.	C2 CGP	Homo sapiens	MSigDB Team
EHLERS_ANEUPLOIDY_UP	40	Up-regulated genes in the expression signature of aneuploidy in uveal melanoma tumors: low vs high aneuploidy.	C2 CGP	Homo sapiens	MSigDB Team
FU_INTERACT_WITH_ALKBH8	13	Proteins identified by mass spectrometry in complexes containing ALKBH8 [GeneID=91801].	C2 CGP	Homo sapiens	MSigDB Team
GALI_TP53_TARGETS_APOPTOTIC_DN	6	Apoptosis genes down-regulated by TP53 [GeneID=7157] in HCT116 cells (colon cancer) treated with thymoquinone [PubChem=10281].	C2 CGP	Homo sapiens	MSigDB Team
GALI_TP53_TARGETS_APOPTOTIC_UP	8	Apoptosis genes up-regulated by TP53 [GeneID=7157] in HCT116 cells (colon cancer) treated with thymoquinone [PubChem=10281].	C2 CGP	Homo sapiens	MSigDB Team
GENTILE_RESPONSE_CLUSTER_D3	53	Cluster d3: genes progressively down-regulated in WS1 cells (fibroblast) through 12 h irradiation with high dose UV-C.	C2 CGP	Homo sapiens	University of Washington
GENTILE_UV_HIGH_DOSE_DN	289	Selected genes down-regulated in WS1 (fibroblast) in response to irradiation with high dose UV-C.	C2 CGP	Homo sapiens	University of Washington
GENTILE_UV_HIGH_DOSE_UP	23	Selected genes up-regulated in WS1 (fibroblast) in response to irradiation with high dose UV-C.	C2 CGP	Homo sapiens	University of Washington
GENTILE_UV_LOW_DOSE_DN	64	Selected genes down-regulated in WS1 (fibroblast) in response to irradiation with low dose UV-C.	C2 CGP	Homo sapiens	University of Washington
GENTILE_UV_LOW_DOSE_UP	25	Selected genes up-regulated in WS1 (fibroblast) in response to irradiation with low dose UV-C.	C2 CGP	Homo sapiens	University of Washington
GENTILE_UV_RESPONSE_CLUSTER_D1	17	Cluster d1: genes down-regulated in WS1 cells (fibroblast) at 6 h after irradiation with high dose UV-C.	C2 CGP	Homo sapiens	University of Washington
GENTILE_UV_RESPONSE_CLUSTER_D2	38	Cluster d2: genes down-regulated consistently in WS1 cells (fibroblast) between 6 h and 24 h after irradiation with high dose UV-C.	C2 CGP	Homo sapiens	University of Washington
GENTILE_UV_RESPONSE_CLUSTER_D4	54	Cluster d4: genes progressively down-regulated in WS1 cells (fibroblast) through 12 h after irradiation with high dose UV-C.	C2 CGP	Homo sapiens	University of Washington
GENTILE_UV_RESPONSE_CLUSTER_D5	35	Cluster d5: genes progressively down-regulated in WS1 cells (fibroblast) through 18 h after irradiation with high dose UV-C.	C2 CGP	Homo sapiens	University of Washington
GENTILE_UV_RESPONSE_CLUSTER_D6	35	Cluster d6: genes progressively down-regulated in WS1 cells (fibroblast) through 18 h after irradiation with high dose UV-C.	C2 CGP	Homo sapiens	University of Washington
GENTILE_UV_RESPONSE_CLUSTER_D7	37	Cluster d7: genes progressively down-regulated in WS1 cells (fibroblast) through 18 h after irradiation with high dose UV-C.	C2 CGP	Homo sapiens	University of Washington
GENTILE_UV_RESPONSE_CLUSTER_D8	37	Cluster d8: genes progressively down-regulated in WS1 cells (fibroblast) through 18 h after irradiation with high dose UV-C.	C2 CGP	Homo sapiens	University of Washington
GENTILE_UV_RESPONSE_CLUSTER_D9	26	Cluster d9: genes progressively down-regulated in WS1 cells (fibroblast) through 24 h after irradiation with high dose UV-C.	C2 CGP	Homo sapiens	University of Washington
GEORGES_CELL_CYCLE_MIR192_TARGETS	62	Experimentally validated direct targets of MIR192 [GeneID=406967] microRNA; MIR192 caused cell cycle arrest in HCT116 cells (colon cancer).	C2 CGP	Homo sapiens	MSigDB Team
GEORGES_TARGETS_OF_MIR192_AND_MIR215	892	Genes down-regulated in HCT116 cells (colon cancer) by expression of MIR192 or MIR215 [GeneID=406967;406997] at 24 h.	C2 CGP	Homo sapiens	MSigDB Team
GO_BCL_2_FAMILY_PROTEIN_COMPLEX	6	A protein complex that consists of members of the Bcl-2 family of anti- and proapoptotic regulators. Bcl-2 proteins respond to cues from various forms of intracellular stress, such as DNA damage or cytokine deprivation, and interact with opposing family members to determine whether or not the caspase proteolytic cascade should be unleashed. [GOC:so, PMID:14634621]	C5 GO	Homo sapiens	Gene Ontology Consortium
GO_BRCA1_A_COMPLEX	8	A protein complex that contains the BRCA1-BARD1 heterodimer, RAP80/UIMC1, BRCC3/BRCC36, BRE/BRCC45, FAM175A/CCDC98/Abraxas and MERIT40/NBA1, and specifically recognizes and binds K63-linked polyubiquitin chains present on histone H2A and H2AX at DNA damage sites. [GOC:mah, PMID:19261749]	C5 GO	Homo sapiens	Gene Ontology Consortium
GO_CELLULAR_RESPONSE_TO_DNA_DAMAGE_STIMULUS	865	Any process that results in a change in state or activity of a cell (in terms of movement, secretion, enzyme production, gene expression, etc.) as a result of a stimulus indicating damage to its DNA from environmental insults or errors during metabolism. [GOC:go_curators]	C5 GO	Homo sapiens	Gene Ontology Consortium
GO_DNA_DAMAGE_RESPONSE_DETECTION_OF_DNA_DAMAGE	38	The series of events required to receive a stimulus indicating DNA damage has occurred and convert it to a molecular signal. [GOC:go_curators]	C5 GO	Homo sapiens	Gene Ontology Consortium
GO_DNA_PROTECTION	5	Any process in which DNA is protected from damage by, for example, oxidative stress. [GOC:jl]	C5 GO	Homo sapiens	Gene Ontology Consortium
GO_DNA_REPAIR	563	The process of restoring DNA after damage. Genomes are subject to damage by chemical and physical agents in the environment (e.g. UV and ionizing radiations, chemical mutagens, fungal and bacterial toxins, etc.) and by free radicals or alkylating agents endogenously generated in metabolism. DNA is also damaged because of errors during its replication. A variety of different DNA repair pathways ha…	C5 GO	Homo sapiens	Gene Ontology Consortium
GO_ERROR_PRONE_TRANSLESION_SYNTHESIS	21	The conversion of DNA-damage induced single-stranded gaps into large molecular weight DNA after replication by using a specialized DNA polymerase or replication complex to insert a defined nucleotide across the lesion. This process does not remove the replication-blocking lesions and causes an increase in the endogenous mutation level. For example, in E. coli, a low fidelity DNA polymerase, pol V…	C5 GO	Homo sapiens	Gene Ontology Consortium
GO_INTRA_S_DNA_DAMAGE_CHECKPOINT	16	A mitotic cell cycle checkpoint that slows DNA synthesis in response to DNA damage by the prevention of new origin firing and the stabilization of slow replication fork progression. [GOC:vw]	C5 GO	Homo sapiens	Gene Ontology Consortium
GO_NEGATIVE_REGULATION_OF_DNA_DAMAGE_CHECKPOINT	5	Any process that stops, prevents, or reduces the frequency, rate or extent of a DNA damage checkpoint. [GOC:BHF, GOC:obol]	C5 GO	Homo sapiens	Gene Ontology Consortium
GO_NEGATIVE_REGULATION_OF_RESPONSE_TO_DNA_DAMAGE_STIMULUS	83	Any process that stops, prevents or reduces the frequency, rate or extent of response to DNA damage stimulus. [GOC:obol]	C5 GO	Homo sapiens	Gene Ontology Consortium
GO_NUCLEOTIDE_EXCISION_REPAIR	110	A DNA repair process in which a small region of the strand surrounding the damage is removed from the DNA helix as an oligonucleotide. The small gap left in the DNA helix is filled in by the sequential action of DNA polymerase and DNA ligase. Nucleotide excision repair recognizes a wide range of substrates, including damage caused by UV irradiation (pyrimidine dimers and 6-4 photoproducts) and ch…	C5 GO	Homo sapiens	Gene Ontology Consortium
GO_NUCLEOTIDE_EXCISION_REPAIR_PREINCISION_COMPLEX_ASSEMBLY	29	The aggregation, arrangement and bonding together of proteins on DNA to form the multiprotein complex involved in damage recognition, DNA helix unwinding, and endonucleolytic cleavage at the site of DNA damage. This assembly occurs before the phosphodiester backbone of the damaged strand is cleaved 3' and 5' of the site of DNA damage. [GOC:elh, PMID:10197977]	C5 GO	Homo sapiens	Gene Ontology Consortium
GO_NUCLEOTIDE_EXCISION_REPAIR_PREINCISION_COMPLEX_STABILIZATION	21	The stabilization of the multiprotein complex involved in damage recognition, DNA helix unwinding, and endonucleolytic cleavage at the site of DNA damage as well as the unwound DNA. The stabilization of the protein-DNA complex ensures proper positioning of the preincision complex before the phosphodiester backbone of the damaged strand is cleaved 3' and 5' of the site of DNA damage. [GOC:elh, PMI…	C5 GO	Homo sapiens	Gene Ontology Consortium
GO_POSITIVE_REGULATION_OF_RESPONSE_TO_DNA_DAMAGE_STIMULUS	105	Any process that activates or increases the frequency, rate or extent of response to DNA damage stimulus. [GOC:obol]	C5 GO	Homo sapiens	Gene Ontology Consortium
GO_REGULATION_OF_DNA_DAMAGE_CHECKPOINT	17	Any process that modulates the frequency, rate or extent of a DNA damage checkpoint. [GOC:obol]	C5 GO	Homo sapiens	Gene Ontology Consortium
GO_REGULATION_OF_INTRINSIC_APOPTOTIC_SIGNALING_PATHWAY_IN_RESPONSE_TO_DNA_DAMAGE_BY_P53_CLASS_MEDIATOR	18	Any process that modulates the frequency, rate or extent of intrinsic apoptotic signaling pathway in response to DNA damage by p53 class mediator. [GOC:TermGenie, PMID:17719541]	C5 GO	Homo sapiens	Gene Ontology Consortium
GO_REGULATION_OF_RESPONSE_TO_DNA_DAMAGE_MAGE_STIMULUS	226	Any process that modulates the frequency, rate or extent of response to DNA damage stimulus. [GOC:obol]	C5 GO	Homo sapiens	Gene Ontology Consortium
GO_SIGNAL_TRANSDUCTION_IN_RESPONSE_TO_DNA_DAMAGE	133	A cascade of processes induced by the detection of DNA damage within a cell. [GOC:go_curators]	C5 GO	Homo sapiens	Gene Ontology Consortium
GO_SIGNAL_TRANSDUCTION_INVOLVED_IN_G2_DNA_DAMAGE_CHECKPOINT	14	A signal transduction process that contributes to a G2/M transition DNA damage checkpoint. [GOC:mtg_cell_cycle]	C5 GO	Homo sapiens	Gene Ontology Consortium
GO_SITE_OF_DNA_DAMAGE	82	A region of a chromosome at which DNA damage has occurred. DNA damage signaling and repair proteins accumulate at the lesion to respond to the damage and repair the DNA to form a continuous DNA helix. [GOC:pg]	C5 GO	Homo sapiens	Gene Ontology Consortium
GO_SITE_OF_DOUBLE_STRAND_BREAK	61	A region of a chromosome at which a DNA double-strand break has occurred. DNA damage signaling and repair proteins accumulate at the lesion to respond to the damage and repair the DNA to form a continuous DNA helix. [GOC:bf, GOC:mah, GOC:vw, PMID:20096808, PMID:21035408]	C5 GO	Homo sapiens	Gene Ontology Consortium
GO_UV_DAMAGE_EXCISION_REPAIR	13	A DNA repair process that is initiated by an endonuclease that introduces a single-strand incision immediately 5' of a UV-induced damage site. UV-damage excision repair acts on both cyclobutane pyrimidine dimers (CPDs) and pyrimidine-pyrimidone 6-4 photoproducts (6-4PPs). [GOC:mah, PMID:9619100]	C5 GO	Homo sapiens	Gene Ontology Consortium
HP_DEFECTIVE_DNA_REPAIR_AFTER_ULTRAVIOLET_RADIATION_DAMAGE	13	Defective DNA repair after ultraviolet radiation damage	C5 HPO	Homo sapiens	The Jackson Laboratory (JAX)
HUPER_BREAST_BASAL_VS_LUMINAL_DN	58	Genes down-regulated in basal mammary epithelial cells compared to the luminal ones.	C2 CGP	Homo sapiens	MSigDB Team
HUPER_BREAST_BASAL_VS_LUMINAL_UP	53	Genes up-regulated in basal mammary epithelial cells compared to the luminal ones.	C2 CGP	Homo sapiens	MSigDB Team
IVANOVSKA_MIR106B_TARGETS	88	A consensus set of genes that were significantly down-regulated by MIR106B [GeneID=406900].	C2 CGP	Homo sapiens	MSigDB Team
KEGG_BASE_EXCISION_REPAIR	35	Base excision repair	C2 CP	Homo sapiens	Kyoto Encyclopedia of Genes and Genomes
KEGG_CELL_CYCLE	125	Cell cycle	C2 CP	Homo sapiens	Kyoto Encyclopedia of Genes and Genomes
KEGG_MISMATCH_REPAIR	23	Mismatch repair	C2 CP	Homo sapiens	Kyoto Encyclopedia of Genes and Genomes
KEGG_NUCLEOTIDE_EXCISION_REPAIR	44	Nucleotide excision repair	C2 CP	Homo sapiens	Kyoto Encyclopedia of Genes and Genomes
KYNG_DNA_DAMAGE_BY_4NQO	36	Genes specifically responding to 4NQO treatment of primary fibroblasts.	C2 CGP	Homo sapiens	MSigDB Team
KYNG_DNA_DAMAGE_BY_4NQO_OR_GAMMA_RADIATION	15	Genes responding to 4NQO treatment and gamma irradiation.	C2 CGP	Homo sapiens	MSigDB Team
KYNG_DNA_DAMAGE_BY_4NQO_OR_UV	60	4NQO treatment and UV irradiation responding genes.	C2 CGP	Homo sapiens	MSigDB Team
KYNG_DNA_DAMAGE_BY_GAMMA_AND_UV_RADIATION	77	Gamma and UV responding genes.	C2 CGP	Homo sapiens	MSigDB Team
KYNG_DNA_DAMAGE_BY_GAMMA_RADIATION	77	Genes specifically responding to gamma radiation.	C2 CGP	Homo sapiens	MSigDB Team
KYNG_DNA_DAMAGE_BY_UV	54	UV only responding genes in primary fibroblasts from young donors.	C2 CGP	Homo sapiens	MSigDB Team
KYNG_DNA_DAMAGE_DN	182	Genes with GO annotation and down-regulated after DNA damage in cell lines from young donors.	C2 CGP	Homo sapiens	MSigDB Team
KYNG_DNA_DAMAGE_UP	205	Genes with GO annotation and up-regulated after DNA damage in cell lines from young donors.	C2 CGP	Homo sapiens	MSigDB Team
KYNG_ENVIRONMENTAL_STRESS_RESPONSE_DN	17	All common down-regulated stress response genes (Human Environmental Stress Response, H-ESR).	C2 CGP	Homo sapiens	MSigDB Team
KYNG_ENVIRONMENTAL_STRESS_RESPONSE_NOT_BY_4NQO_IN_OLD	12	Human environmental etress response genes not changed in primary fibroblasts from old donors in response to 4NQO treatment.	C2 CGP	Homo sapiens	MSigDB Team
KYNG_ENVIRONMENTAL_STRESS_RESPONSE_NOT_BY_4NQO_IN_WS	37	Human environmental stress response genes not changed in primary fibroblasts from Wilmor syndrom (WS) patients in response to 4NQO treatment.	C2 CGP	Homo sapiens	MSigDB Team
KYNG_ENVIRONMENTAL_STRESS_RESPONSE_NOT_BY_GAMMA_IN_OLD	29	Human environmental stress response (H-ESR) genes not changed in primary fibroblasts from old donors in response to gamma radiation.	C2 CGP	Homo sapiens	MSigDB Team
KYNG_ENVIRONMENTAL_STRESS_RESPONSE_NOT_BY_GAMMA_IN_WS	31	Human environmental stress response genes not changed in primary fibroblasts from Werner syndrom (WS) patients in response to gamma radiation.	C2 CGP	Homo sapiens	MSigDB Team
KYNG_ENVIRONMENTAL_STRESS_RESPONSE_NOT_BY_UV_IN_OLD	23	Human environmental stress response genes not changed in primary fibroblasts from old donors in response to UV radiation.	C2 CGP	Homo sapiens	MSigDB Team
KYNG_ENVIRONMENTAL_STRESS_RESPONSE_NOT_BY_UV_IN_WS	12	Human environmental stress response genes not changed in primary fibroblasts from patients with Warner syndrom (WS) .	C2 CGP	Homo sapiens	MSigDB Team
KYNG_ENVIRONMENTAL_STRESS_RESPONSE_UP	53	All common up-regulated stress response genes (Human Environmental Stress Response, H-ESR).	C2 CGP	Homo sapiens	MSigDB Team
LAU_APOPTOSIS_CDKN2A_DN	5	Genes down-regulated by UV-irradiation in cervical cancer cells after knockdown of CDKN2A [GeneID=1029].	C2 CGP	Homo sapiens	MSigDB Team
LAU_APOPTOSIS_CDKN2A_UP	55	Genes up-regulated by UV-irradiation in cervical cancer cells after knockdown of CDKN2A [GeneID=1029].	C2 CGP	Homo sapiens	MSigDB Team
LU_AGING_BRAIN_DN	153	Age down-regulated genes in the human frontal cortex.	C2 CGP	Homo sapiens	University of Washington
LU_AGING_BRAIN_UP	262	Age up-regulated genes in the human frontal cortex.	C2 CGP	Homo sapiens	University of Washington
MACLACHLAN_BRCA1_TARGETS_DN	16	Genes down-regulated in SW480 cells (colon cancer with mutated p53 [GeneID=7157]) upon expression of BRCA1 [GeneID=672] off an adenovirus vector.	C2 CGP	Homo sapiens	University of Washington
MACLACHLAN_BRCA1_TARGETS_UP	21	Genes up-regulated in SW480 cells (colon cancer with mutated p53 [GeneID=7157]) upon expression of BRCA1 [GeneID=672] off an adenovirus vector.	C2 CGP	Homo sapiens	University of Washington
MANN_RESPONSE_TO_AMIFOSTINE_DN	9	Genes down-regulated in HCT116 cells (colon cancer) after treatment with amifostine [PubChem=2141] depending on the presence of TP53 [GeneID=7157]: TP53-positive vs TP53-null cells.	C2 CGP	Homo sapiens	MSigDB Team
MANN_RESPONSE_TO_AMIFOSTINE_UP	19	Genes up-regulated in HCT116 cells (colon cancer) after treatment with amifostine [PubChem=2141] depending on the presence of TP53 [GeneID=7157]: TP53-positive vs TP53-null cells.	C2 CGP	Homo sapiens	MSigDB Team
MARTINEZ_RESPONSE_TO_TRABECTEDIN	50	Genes down-regulated by trabectedin [PubChem=3199] and its synthetic analog phthalascidin Pt 650 in HCT116 cells (colon cancer).	C2 CGP	Homo sapiens	University of Washington
MODULE_403	46	DNA damage response.	C4 CM	Homo sapiens	Broad Institute
PHONG_TNF_RESPONSE_NOT_VIA_P38	341	Genes whose expression changes in Calu-6 cells (lung cancer) by TNF [GeneID=7124] were not affected by p38 inhibitor LY479754.	C2 CGP	Homo sapiens	MSigDB Team
PHONG_TNF_RESPONSE_VIA_P38_COMPLETE	225	Genes whose expression changes in Calu-6 cells (lung cancer) by TNF [GeneID=7124] were blocked completely by p38 inhibitor LY479754.	C2 CGP	Homo sapiens	MSigDB Team
PHONG_TNF_RESPONSE_VIA_P38_PARTIAL	164	Genes whose expression changes in Calu-6 cells (lung cancer) by TNF [GeneID=7124] were blocked partially by p38 inhibitor LY479754.	C2 CGP	Homo sapiens	MSigDB Team
PHONG_TNF_TARGETS_DN	8	Genes down-regulated in Calu-6 cells (lung cancer) at 1 h time point after TNF [GeneID=7124] treatment.	C2 CGP	Homo sapiens	MSigDB Team
PHONG_TNF_TARGETS_UP	63	Genes up-regulated in Calu-6 cells (lung cancer) at 1 h time point after TNF [GeneID=7124] treatment.	C2 CGP	Homo sapiens	MSigDB Team
REACTOME_DNA_DAMAGE_BYPASS	48	DNA Damage Bypass	C2 CP	Homo sapiens	Reactome
REACTOME_DNA_DAMAGE_RECOGNITION_IN_GG_NER	38	DNA Damage Recognition in GG-NER	C2 CP	Homo sapiens	Reactome
REACTOME_DNA_DAMAGE_REVERSAL	8	DNA Damage Reversal	C2 CP	Homo sapiens	Reactome
REACTOME_G1_S_DNA_DAMAGE_CHECKPOINTS	68	G1/S DNA Damage Checkpoints	C2 CP	Homo sapiens	Reactome
REACTOME_G2_M_DNA_DAMAGE_CHECKPOINT	95	G2/M DNA damage checkpoint	C2 CP	Homo sapiens	Reactome
REACTOME_P53_DEPENDENT_G1_DNA_DAMAGE_RESPONSE	55	Genes involved in p53-Dependent G1 DNA Damage Response	ARCHIVED C2_CP C2_CP:REACTOME	Homo sapiens	Reactome
REACTOME_P53_INDEPENDENT_G1_S_DNA_DAMAGE_CHECKPOINT	49	Genes involved in p53-Independent G1/S DNA damage checkpoint	ARCHIVED C2_CP C2_CP:REACTOME	Homo sapiens	Reactome
REACTOME_RECOGNITION_OF_DNA_DAMAGE_BY_PCNA_CONTAINING_REPLICATION_COMPLEX	30	Recognition of DNA damage by PCNA-containing replication complex	C2 CP	Homo sapiens	Reactome
REACTOME_SUMOYLATION_OF_DNA_DAMAGE_RESPONSE_AND_REPAIR_PROTEINS	77	SUMOylation of DNA damage response and repair proteins	C2 CP	Homo sapiens	Reactome
REN_BOUND_BY_E2F	62	Genes whose promoters were bound by E2F1 and E2F4 [GeneID=1869;1874] in the primary fibroblasts WI-38, by ChIP on chip assay.	C2 CGP	Homo sapiens	Broad Institute
SCIAN_CELL_CYCLE_TARGETS_OF_TP53_AND_TP73_DN	22	Cell cycle genes down-regulated in H1299 cells (lung cancer) after overexpression of either P53 or P73 [GeneID=7157;7161].	C2 CGP	Homo sapiens	MSigDB Team
SCIAN_CELL_CYCLE_TARGETS_OF_TP53_AND_TP73_UP	9	Cell cycle genes up-regulated in H1299 cells (lung cancer) after overexpression of either P53 or P73 [GeneID=7157;7161].	C2 CGP	Homo sapiens	MSigDB Team
SCIAN_INVERSED_TARGETS_OF_TP53_AND_TP73_DN	30	Genes that were inversely correlated in H1299 cells (lung cancer): down-regulated by P53 [GeneID=7157] and up-regulated by P73 [GeneID=7161].	C2 CGP	Homo sapiens	MSigDB Team
SCIAN_INVERSED_TARGETS_OF_TP53_AND_TP73_UP	11	Genes that were inversely correlated in H1299 cells (lung cancer): up-regulated by P53 [GeneID=7157] and down-regulated by P73 [GeneID=7161].	C2 CGP	Homo sapiens	MSigDB Team
WANG_CISPLATIN_RESPONSE_AND_XPC_DN	219	Genes down-regulated in fibroblasts with defective XPC [GeneID=7508] in response to cisplatin [PubChem=2767].	C2 CGP	Homo sapiens	University of Washington
WANG_CISPLATIN_RESPONSE_AND_XPC_UP	185	Genes up-regulated in fibroblasts with defective XPC [GeneID=7508] in response to cisplatin [PubChem=2767].	C2 CGP	Homo sapiens	University of Washington
WP_DNA_DAMAGE_RESPONSE	69	DNA Damage Response	C2 CP	Homo sapiens	WikiPathways
WP_DNA_DAMAGE_RESPONSE_ONLY_ATM_DEPENDENDENT	114	DNA Damage Response (only ATM dependent)	C2 CP	Homo sapiens	WikiPathways
WP_MIRNA_REGULATION_OF_DNA_DAMAGE_RESPONSE	93	miRNA Regulation of DNA Damage Response	C2 CP	Homo sapiens	WikiPathways
WP_MIRNAS_INVOLVED_IN_DNA_DAMAGE_RESPONSE	50	miRNAs involved in DNA damage response	C2 CP	Homo sapiens	WikiPathways
ZERBINI_RESPONSE_TO_SULINDAC_DN	6	Selected genes down-regulated in DU145 and PC-3 cells (prostate cancer) after treatment with the NSAID (non-steroid anti-inflammatory drug) sulindac [PubChem=5352].	C2 CGP	Homo sapiens	MSigDB Team
ZERBINI_RESPONSE_TO_SULINDAC_UP	9	Selected genes up-regulated in DU145 and PC-3 cells (prostate cancer) after treatment with the NSAID (non-steroid anti-inflammatory drug) sulindac [PubChem=5352].	C2 CGP	Homo sapiens	MSigDB Team
ZHOU_CELL_CYCLE_GENES_IN_IR_RESPONSE_24HR	126	Cell cycle genes significantly (p =< 0.05) changed in fibroblast cells at 24 h after exposure to ionizing radiation.	C2 CGP	Homo sapiens	Dana-Farber Cancer Institute
ZHOU_CELL_CYCLE_GENES_IN_IR_RESPONSE_2HR	8	Cell cycle genes significantly (p =< 0.05) changed in fibroblast cells at 2 h after exposure to ionizing radiation.	C2 CGP	Homo sapiens	Dana-Farber Cancer Institute
ZHOU_CELL_CYCLE_GENES_IN_IR_RESPONSE_6HR	84	Cell cycle genes significantly (p =< 0.05) changed in fibroblast cells at 6 h after exposure to ionizing radiation.	C2 CGP	Homo sapiens	Dana-Farber Cancer Institute

## Sheet: collection
name	# genes	description	collections	organism	contributor
AMBROSINI_FLAVOPIRIDOL_TREATMENT_TP53	108	Genes down-regulated by flavopiridol [PubChem=5287969] in the HCT116 cells (colon cancer) depending on their TP53 [GeneID=7157] status: wild-type vs loss of the gene's function (LOF).	C2 CGP	Homo sapiens	MSigDB Team
BIOCARTA_ATM_PATHWAY	20	ATM Signaling Pathway	C2 CP	Homo sapiens	BioCarta
BIOCARTA_ATRBRCA_PATHWAY	22	Role of BRCA1, BRCA2 and ATR in Cancer Susceptibility	C2 CP	Homo sapiens	BioCarta
BIOCARTA_CDC25_PATHWAY	9	cdc25 and chk1 Regulatory Pathway in response to DNA damage	C2 CP	Homo sapiens	BioCarta
BIOCARTA_CHEMICAL_PATHWAY	18	Apoptotic Signaling in Response to DNA Damage	C2 CP	Homo sapiens	BioCarta
BIOCARTA_G2_PATHWAY	24	Cell Cycle: G2/M Checkpoint	C2 CP	Homo sapiens	BioCarta
BIOCARTA_P53_PATHWAY	16	p53 Signaling Pathway	C2 CP	Homo sapiens	BioCarta
BIOCARTA_P53HYPOXIA_PATHWAY	21	Hypoxia and p53 in the Cardiovascular system	C2 CP	Homo sapiens	BioCarta
BIOCARTA_PML_PATHWAY	17	Regulation of transcriptional activity by PML	C2 CP	Homo sapiens	BioCarta
BIOCARTA_RB_PATHWAY	13	RB Tumor Suppressor/Checkpoint Signaling in response to DNA damage	C2 CP	Homo sapiens	BioCarta
BIOCARTA_SET_PATHWAY	10	Granzyme A mediated Apoptosis Pathway	C2 CP	Homo sapiens	BioCarta
CASORELLI_ACUTE_PROMYELOCYTIC_LEUKEMIA_DMIA_DN	669	Genes down-regulated in APL (acute promyeolocytic leukemia) blasts expressing PML-RARA fusion [GeneID=5371;5914] compared to normal promyeloblasts.	C2 CGP	Homo sapiens	MSigDB Team
CASORELLI_ACUTE_PROMYELOCYTIC_LEUKEMIA_UMIA_UP	173	Genes up-regulated in APL (acute promyeolocytic leukemia) blasts expressing PML-RARA fusion [GeneID=5371;5914] compared to normal promyeloblasts.	C2 CGP	Homo sapiens	MSigDB Team
CASORELLI_APL_SECONDARY_VS_DE_NOVO_DN	4	Genes down-regulated in secondary APL (acute promyelocytic leukemia) compared to the de novo tumors.	ARCHIVED C2_CGP	Homo sapiens	MSigDB Team
CASORELLI_APL_SECONDARY_VS_DE_NOVO_UP	39	Genes up-regulated in secondary APL (acute promyelocytic leukemia) compared to the de novo tumors.	C2 CGP	Homo sapiens	MSigDB Team
COLLIS_PRKDC_REGULATORS	13	Proteins that regulate activity of PRKDC [GeneID=5591].	C2 CGP	Homo sapiens	MSigDB Team
COLLIS_PRKDC_SUBSTRATES	17	Substrates of PRKDC [GeneID=5591].	C2 CGP	Homo sapiens	MSigDB Team
CROSBY_E2F4_TARGETS	6	Putative E2F4 [GeneID=1874] target genes identified as mitotic genes down-regulated in the LNCaP C4-2 cells (prostate cancer) at both 6 and 24 h following irradiation.	C2 CGP	Homo sapiens	MSigDB Team
DACOSTA_ERCC3_ALLELE_XPCS_VS_TTD_DN	34	Genes down-regulated in fibroblasts expressing different mutant forms of ERCC3 [GeneID=2071]: XP/CS (xeroderma pigmentosum (XP) and Cockraine's syndrome (CS)) vs TTD (trichothiodystrophy).	C2 CGP	Homo sapiens	MSigDB Team
DACOSTA_ERCC3_ALLELE_XPCS_VS_TTD_UP	28	Genes up-regulated in fibroblasts expressing different mutant forms of ERCC3 [GeneID=2071]: XP/CS (xeroderma pigmentosum (XP) and Cockraine's syndrome (CS)) vs TTD (trichothiodystrophy).	C2 CGP	Homo sapiens	MSigDB Team
DACOSTA_LOW_DOSE_UV_RESPONSE_VIA_ERCC3_XCC3_XPCS_DN	9	Genes down-regulated in fibroblasts expressing the XP/CS mutant form of ERCC3 [GeneID=2071], after low dose UVC irradiation.	C2 CGP	Homo sapiens	MSigDB Team
DACOSTA_LOW_DOSE_UV_RESPONSE_VIA_ERCC3_XCC3_XPCS_UP	14	Genes up-regulated in fibroblasts expressing the XP/CS mutant form of ERCC3 [GeneID=2071], after low dose UVC irradiation.	C2 CGP	Homo sapiens	MSigDB Team
DACOSTA_UV_RESPONSE_VIA_ERCC3_COMMON_DN	466	Common down-regulated transcripts in fibroblasts expressing either XP/CS or TDD mutant forms of ERCC3 [GeneID=2071], after UVC irradiation.	C2 CGP	Homo sapiens	MSigDB Team
DACOSTA_UV_RESPONSE_VIA_ERCC3_COMMON_UP	75	Common up-regulated transcripts in fibroblasts expressing either XP/CS or TDD mutant forms of ERCC3 [GeneID=2071], after UVC irradiation.	C2 CGP	Homo sapiens	MSigDB Team
DACOSTA_UV_RESPONSE_VIA_ERCC3_DN	856	Genes down-regulated in fibroblasts expressing mutant forms of ERCC3 [GeneID=2071] after UV irradiation.	C2 CGP	Homo sapiens	MSigDB Team
DACOSTA_UV_RESPONSE_VIA_ERCC3_TTD_DN	84	Genes exclusively down-regulated in fibroblasts expressing the TTD mutant form of ERCC3 [GeneID=2071], after UVC irradiation.	C2 CGP	Homo sapiens	MSigDB Team
DACOSTA_UV_RESPONSE_VIA_ERCC3_TTD_UP	59	Genes exclusively up-regulated in fibroblasts expressing the TTD mutant form of ERCC3 [GeneID=2071], after UVC irradiation.	C2 CGP	Homo sapiens	MSigDB Team
DACOSTA_UV_RESPONSE_VIA_ERCC3_UP	316	Genes up-regulated in fibroblasts expressing mutant forms of ERCC3 [GeneID=2071] after UV irradiation.	C2 CGP	Homo sapiens	MSigDB Team
DACOSTA_UV_RESPONSE_VIA_ERCC3_XPCS_DN	85	Genes exclusively down-regulated in fibroblasts expressing the XP/CS mutant form of ERCC3 [GeneID=2071] after high dose UVC irradiation.	C2 CGP	Homo sapiens	MSigDB Team
DACOSTA_UV_RESPONSE_VIA_ERCC3_XPCS_UP	25	Genes exclusively up-regulated in fibroblasts expressing the XP/CS mutant form of ERCC3 [GeneID=2071] after high dose UVC irradiation.	C2 CGP	Homo sapiens	MSigDB Team
DEBIASI_APOPTOSIS_BY_REOVIRUS_INFECTION_TION_DN	276	Genes down-regulated in HEK293 cells (embryonic kidney) at 6 h, 12 h or 24 h after infection with reovirus strain T3A (known as a strong inducer of apoptosis).	C2 CGP	Homo sapiens	University of Washington
DEBIASI_APOPTOSIS_BY_REOVIRUS_INFECTION_TION_UP	300	Genes up-regulated in HEK293 cells (embryonic kidney) at 6 h, 12 h or 24 h after infection with reovirus strain T3A (known as a strong inducer of apoptosis).	C2 CGP	Homo sapiens	University of Washington
DING_LUNG_CANCER_BY_MUTATION_RATE	20	The lung adenocarcinoma TSP (tumor sequencing project) genes mutations in which show positive correlation with the higher overall mutation rate.	C2 CGP	Homo sapiens	MSigDB Team
DING_LUNG_CANCER_EXPRESSION_BY_COPY_NUMBER	100	The lung adenocarcinoma TSP (tumor sequencing project) genes showing strong correlation between DNA copy number variation and gene expression.	C2 CGP	Homo sapiens	MSigDB Team
DING_LUNG_CANCER_MUTATED_FREQUENTLY	12	The lung adenocarcinoma TSP (tumor sequencing project) genes with significantly higher frequencies of nonsense, splice site, and frame-shift mutations.	C2 CGP	Homo sapiens	MSigDB Team
DING_LUNG_CANCER_MUTATED_RECURRENTLY	6	The lung adenocarcinoma TSP (tumor sequencing project) genes bearing recurrent somatic mutations.	C2 CGP	Homo sapiens	MSigDB Team
DING_LUNG_CANCER_MUTATED_SIGNIFICANTLY	26	The lung adenocarcinoma TSP (tumor sequencing project) genes that were found significantly mutated by at least one method.	C2 CGP	Homo sapiens	MSigDB Team
DODD_NASOPHARYNGEAL_CARCINOMA_DN	1402	Genes down-regulated in nasopharyngeal carcinoma (NPC) compared to the normal tissue.	C2 CGP	Homo sapiens	MSigDB Team
DODD_NASOPHARYNGEAL_CARCINOMA_UP	1806	Genes up-regulated in nasopharyngeal carcinoma (NPC) compared to the normal tissue.	C2 CGP	Homo sapiens	MSigDB Team
EGUCHI_CELL_CYCLE_RB1_TARGETS	22	RB1 [GeneID=5925] target genes involved in cell cycle regulation: genes down-regulated by doxorubicin [PubChem=31703] only in cells expressing RB1.	C2 CGP	Homo sapiens	MSigDB Team
EHLERS_ANEUPLOIDY_DN	12	Down-regulated genes in the expression signature of aneuploidy in uveal melanoma tumors: low vs high aneuploidy.	C2 CGP	Homo sapiens	MSigDB Team
EHLERS_ANEUPLOIDY_UP	40	Up-regulated genes in the expression signature of aneuploidy in uveal melanoma tumors: low vs high aneuploidy.	C2 CGP	Homo sapiens	MSigDB Team
FERREIRA_EWINGS_SARCOMA_UNSTABLE_VS_STABLE_DN	96	Genes down-regulated in genomically unstable Ewing's sarcoma tumors compared to the stable ones.	C2 CGP	Homo sapiens	MSigDB Team
FERREIRA_EWINGS_SARCOMA_UNSTABLE_VS_STABLE_UP	163	Genes up-regulated in genomically unstable Ewing's sarcoma tumors compared to the stable ones.	C2 CGP	Homo sapiens	MSigDB Team
FU_INTERACT_WITH_ALKBH8	13	Proteins identified by mass spectrometry in complexes containing ALKBH8 [GeneID=91801].	C2 CGP	Homo sapiens	MSigDB Team
GALI_TP53_TARGETS_APOPTOTIC_DN	6	Apoptosis genes down-regulated by TP53 [GeneID=7157] in HCT116 cells (colon cancer) treated with thymoquinone [PubChem=10281].	C2 CGP	Homo sapiens	MSigDB Team
GALI_TP53_TARGETS_APOPTOTIC_UP	8	Apoptosis genes up-regulated by TP53 [GeneID=7157] in HCT116 cells (colon cancer) treated with thymoquinone [PubChem=10281].	C2 CGP	Homo sapiens	MSigDB Team
GCM_APEX1	114	Neighborhood of APEX1	C4 CGN	Homo sapiens	MSigDB Team
GENTILE_RESPONSE_CLUSTER_D3	53	Cluster d3: genes progressively down-regulated in WS1 cells (fibroblast) through 12 h irradiation with high dose UV-C.	C2 CGP	Homo sapiens	University of Washington
GENTILE_UV_HIGH_DOSE_DN	289	Selected genes down-regulated in WS1 (fibroblast) in response to irradiation with high dose UV-C.	C2 CGP	Homo sapiens	University of Washington
GENTILE_UV_HIGH_DOSE_UP	23	Selected genes up-regulated in WS1 (fibroblast) in response to irradiation with high dose UV-C.	C2 CGP	Homo sapiens	University of Washington
GENTILE_UV_LOW_DOSE_DN	64	Selected genes down-regulated in WS1 (fibroblast) in response to irradiation with low dose UV-C.	C2 CGP	Homo sapiens	University of Washington
GENTILE_UV_LOW_DOSE_UP	25	Selected genes up-regulated in WS1 (fibroblast) in response to irradiation with low dose UV-C.	C2 CGP	Homo sapiens	University of Washington
GENTILE_UV_RESPONSE_CLUSTER_D1	17	Cluster d1: genes down-regulated in WS1 cells (fibroblast) at 6 h after irradiation with high dose UV-C.	C2 CGP	Homo sapiens	University of Washington
GENTILE_UV_RESPONSE_CLUSTER_D2	38	Cluster d2: genes down-regulated consistently in WS1 cells (fibroblast) between 6 h and 24 h after irradiation with high dose UV-C.	C2 CGP	Homo sapiens	University of Washington
GENTILE_UV_RESPONSE_CLUSTER_D4	54	Cluster d4: genes progressively down-regulated in WS1 cells (fibroblast) through 12 h after irradiation with high dose UV-C.	C2 CGP	Homo sapiens	University of Washington
GENTILE_UV_RESPONSE_CLUSTER_D5	35	Cluster d5: genes progressively down-regulated in WS1 cells (fibroblast) through 18 h after irradiation with high dose UV-C.	C2 CGP	Homo sapiens	University of Washington
GENTILE_UV_RESPONSE_CLUSTER_D6	35	Cluster d6: genes progressively down-regulated in WS1 cells (fibroblast) through 18 h after irradiation with high dose UV-C.	C2 CGP	Homo sapiens	University of Washington
GENTILE_UV_RESPONSE_CLUSTER_D7	37	Cluster d7: genes progressively down-regulated in WS1 cells (fibroblast) through 18 h after irradiation with high dose UV-C.	C2 CGP	Homo sapiens	University of Washington
GENTILE_UV_RESPONSE_CLUSTER_D8	37	Cluster d8: genes progressively down-regulated in WS1 cells (fibroblast) through 18 h after irradiation with high dose UV-C.	C2 CGP	Homo sapiens	University of Washington
GENTILE_UV_RESPONSE_CLUSTER_D9	26	Cluster d9: genes progressively down-regulated in WS1 cells (fibroblast) through 24 h after irradiation with high dose UV-C.	C2 CGP	Homo sapiens	University of Washington
GEORGES_CELL_CYCLE_MIR192_TARGETS	62	Experimentally validated direct targets of MIR192 [GeneID=406967] microRNA; MIR192 caused cell cycle arrest in HCT116 cells (colon cancer).	C2 CGP	Homo sapiens	MSigDB Team
GEORGES_TARGETS_OF_MIR192_AND_MIR215	892	Genes down-regulated in HCT116 cells (colon cancer) by expression of MIR192 or MIR215 [GeneID=406967;406997] at 24 h.	C2 CGP	Homo sapiens	MSigDB Team
GNF2_APEX1	92	Neighborhood of APEX1	C4 CGN	Homo sapiens	MSigDB Team
GO_BCL_2_FAMILY_PROTEIN_COMPLEX	6	A protein complex that consists of members of the Bcl-2 family of anti- and proapoptotic regulators. Bcl-2 proteins respond to cues from various forms of intracellular stress, such as DNA damage or cytokine deprivation, and interact with opposing family members to determine whether or not the caspase proteolytic cascade should be unleashed. [GOC:so, PMID:14634621]	C5 GO	Homo sapiens	Gene Ontology Consortium
GO_BRCA1_A_COMPLEX	8	A protein complex that contains the BRCA1-BARD1 heterodimer, RAP80/UIMC1, BRCC3/BRCC36, BRE/BRCC45, FAM175A/CCDC98/Abraxas and MERIT40/NBA1, and specifically recognizes and binds K63-linked polyubiquitin chains present on histone H2A and H2AX at DNA damage sites. [GOC:mah, PMID:19261749]	C5 GO	Homo sapiens	Gene Ontology Consortium
GO_CELLULAR_RESPONSE_TO_DNA_DAMAGE_STIMULUS	865	Any process that results in a change in state or activity of a cell (in terms of movement, secretion, enzyme production, gene expression, etc.) as a result of a stimulus indicating damage to its DNA from environmental insults or errors during metabolism. [GOC:go_curators]	C5 GO	Homo sapiens	Gene Ontology Consortium
GO_DNA_APURINIC_OR_APYRIMIDINIC_SITE_ENDONUCLEASE_ACTIVITY	13	Catalysis of the cleavage of the C-O-P bond in the AP site created when DNA glycosylase removes a damaged base, involved in the DNA base excision repair pathway (BER). [Wikipedia:AP_endonuclease]	C5 GO	Homo sapiens	Gene Ontology Consortium
GO_DNA_DAMAGE_RESPONSE_DETECTION_OF_DNA_DAMAGE	38	The series of events required to receive a stimulus indicating DNA damage has occurred and convert it to a molecular signal. [GOC:go_curators]	C5 GO	Homo sapiens	Gene Ontology Consortium
GO_DNA_PROTECTION	5	Any process in which DNA is protected from damage by, for example, oxidative stress. [GOC:jl]	C5 GO	Homo sapiens	Gene Ontology Consortium
GO_DNA_REPAIR	563	The process of restoring DNA after damage. Genomes are subject to damage by chemical and physical agents in the environment (e.g. UV and ionizing radiations, chemical mutagens, fungal and bacterial toxins, etc.) and by free radicals or alkylating agents endogenously generated in metabolism. DNA is also damaged because of errors during its replication. A variety of different DNA repair pathways ha…	C5 GO	Homo sapiens	Gene Ontology Consortium
GO_DNA_REPAIR	563	The process of restoring DNA after damage. Genomes are subject to damage by chemical and physical agents in the environment (e.g. UV and ionizing radiations, chemical mutagens, fungal and bacterial toxins, etc.) and by free radicals or alkylating agents endogenously generated in metabolism. DNA is also damaged because of errors during its replication. A variety of different DNA repair pathways ha…	C5 GO	Homo sapiens	Gene Ontology Consortium
GO_DNA_REPAIR_COMPLEX	40	A protein complex involved in DNA repair processes including direct reversal, base excision repair, nucleotide excision repair, photoreactivation, bypass, double-strand break repair pathway, and mismatch repair pathway. [GOC:bhm, PMID:17217467, PMID:20551348, PMID:22749910, PMID:24192350]	C5 GO	Homo sapiens	Gene Ontology Consortium
GO_DNA_REPAIR_COMPLEX_ASSEMBLY	6	The aggregation, arrangement and bonding together of a set of components to form a DNA repair complex. [GOC:pg, PMID:27113759, PMID:27233470]	C5 GO	Homo sapiens	Gene Ontology Consortium
GO_DOUBLE_STRAND_BREAK_REPAIR	262	The repair of double-strand breaks in DNA via homologous and nonhomologous mechanisms to reform a continuous DNA helix. [GOC:elh]	C5 GO	Homo sapiens	Gene Ontology Consortium
GO_DOUBLE_STRAND_BREAK_REPAIR_INVOLVED_IN_MEIOTIC_RECOMBINATION	5	The repair of double-strand breaks in DNA via homologous and nonhomologous mechanisms to reform a continuous DNA helix that contributes to reciprocal meiotic recombination. [GOC:mah, PMID:15238514]	C5 GO	Homo sapiens	Gene Ontology Consortium
GO_DOUBLE_STRAND_BREAK_REPAIR_VIA_SYNTHESIS_DEPENDENT_STRAND_ANNEALING	9	SDSA is a major mechanism of double-strand break repair in mitosis which allows for the error-free repair of a double-strand break without the exchange of adjacent sequences. The broken DNA searches for and base pairs with a homologous region in an intact chromosome. DNA synthesis initiates from the 3' end of the invading DNA strand, using the intact chromosome as the template. Newly synthesized …	C5 GO	Homo sapiens	Gene Ontology Consortium
GO_EPSILON_DNA_POLYMERASE_COMPLEX	5	A heterotetrameric DNA polymerase complex that catalyzes processive DNA synthesis in the absence of PCNA, but is further stimulated in the presence of PCNA. The complex contains a large catalytic subunit and three small subunits, and is best characterized in Saccharomyces, in which the subunits are named Pol2p, Dpb2p, Dpb3p, and Dpb4p. Some evidence suggests that DNA polymerase epsilon is the lea…	C5 GO	Homo sapiens	Gene Ontology Consortium
GO_ERROR_PRONE_TRANSLESION_SYNTHESIS	21	The conversion of DNA-damage induced single-stranded gaps into large molecular weight DNA after replication by using a specialized DNA polymerase or replication complex to insert a defined nucleotide across the lesion. This process does not remove the replication-blocking lesions and causes an increase in the endogenous mutation level. For example, in E. coli, a low fidelity DNA polymerase, pol V…	C5 GO	Homo sapiens	Gene Ontology Consortium
GO_GLOBAL_GENOME_NUCLEOTIDE_EXCISION_REPAIR	26	The nucleotide-excision repair process in which DNA lesions are removed from nontranscribed strands and from transcriptionally silent regions over the entire genome. [PMID:10197977, PMID:18794354]	C5 GO	Homo sapiens	Gene Ontology Consortium
GO_INTRA_S_DNA_DAMAGE_CHECKPOINT	16	A mitotic cell cycle checkpoint that slows DNA synthesis in response to DNA damage by the prevention of new origin firing and the stabilization of slow replication fork progression. [GOC:vw]	C5 GO	Homo sapiens	Gene Ontology Consortium
GO_MISMATCH_REPAIR	38	A system for the correction of errors in which an incorrect base, which cannot form hydrogen bonds with the corresponding base in the parent strand, is incorporated into the daughter strand. The mismatch repair system promotes genomic fidelity by repairing base-base mismatches, insertion-deletion loops and heterologies generated during DNA replication and recombination. [ISBN:0198506732, PMID:116…	C5 GO	Homo sapiens	Gene Ontology Consortium
GO_MRE11_COMPLEX	7	Trimeric protein complex that possesses endonuclease activity; involved in meiotic recombination, DNA repair and checkpoint signaling. In Saccharomyces cerevisiae, the complex comprises Mre11p, Rad50p, and Xrs2p; complexes identified in other species generally contain proteins orthologous to the Saccharomyces cerevisiae proteins. [GOC:mah, GOC:vw, PMID:11988766, PMID:17674145]	C5 GO	Homo sapiens	Gene Ontology Consortium
GO_NEGATIVE_REGULATION_OF_DNA_DAMAGE_CHECKPOINT	5	Any process that stops, prevents, or reduces the frequency, rate or extent of a DNA damage checkpoint. [GOC:BHF, GOC:obol]	C5 GO	Homo sapiens	Gene Ontology Consortium
GO_NEGATIVE_REGULATION_OF_RESPONSE_TO_DNA_DAMAGE_STIMULUS	83	Any process that stops, prevents or reduces the frequency, rate or extent of response to DNA damage stimulus. [GOC:obol]	C5 GO	Homo sapiens	Gene Ontology Consortium
GO_NON_RECOMBINATIONAL_REPAIR	104	A DNA repair process in which that does not require the exchange of genetic material between the broken DNA molecule and a homologous region of DNA. [GOC:elh]	C5 GO	Homo sapiens	Gene Ontology Consortium
GO_NONHOMOLOGOUS_END_JOINING_COMPLEX	9	A protein complex that plays a role in DNA double-strand break repair via nonhomologous end joining. Such complexes typically contain a specialized DNA ligase (e.g. Lig4 in eukaryotes) and one or more proteins that bind to DNA ends. [GOC:mah, PMID:17072889, PMID:17938628]	C5 GO	Homo sapiens	Gene Ontology Consortium
GO_NUCLEOTIDE_EXCISION_REPAIR	110	A DNA repair process in which a small region of the strand surrounding the damage is removed from the DNA helix as an oligonucleotide. The small gap left in the DNA helix is filled in by the sequential action of DNA polymerase and DNA ligase. Nucleotide excision repair recognizes a wide range of substrates, including damage caused by UV irradiation (pyrimidine dimers and 6-4 photoproducts) and ch…	C5 GO	Homo sapiens	Gene Ontology Consortium
GO_NUCLEOTIDE_EXCISION_REPAIR	110	A DNA repair process in which a small region of the strand surrounding the damage is removed from the DNA helix as an oligonucleotide. The small gap left in the DNA helix is filled in by the sequential action of DNA polymerase and DNA ligase. Nucleotide excision repair recognizes a wide range of substrates, including damage caused by UV irradiation (pyrimidine dimers and 6-4 photoproducts) and ch…	C5 GO	Homo sapiens	Gene Ontology Consortium
GO_NUCLEOTIDE_EXCISION_REPAIR_DNA_DAMAGE_RECOGNITION	23	The identification of lesions in DNA, such as pyrimidine-dimers, intrastrand cross-links, and bulky adducts. The wide range of substrate specificity suggests the repair complex recognizes distortions in the DNA helix. [GOC:elh, PMID:10197977]	C5 GO	Homo sapiens	Gene Ontology Consortium
GO_NUCLEOTIDE_EXCISION_REPAIR_DNA_GAP_FILLING	23	Repair of the gap in the DNA helix by DNA polymerase and DNA ligase after the portion of the strand containing the lesion has been removed by pyrimidine-dimer repair enzymes. [ISBN:0815316194]	C5 GO	Homo sapiens	Gene Ontology Consortium
GO_NUCLEOTIDE_EXCISION_REPAIR_PREINCISION_COMPLEX_ASSEMBLY	29	The aggregation, arrangement and bonding together of proteins on DNA to form the multiprotein complex involved in damage recognition, DNA helix unwinding, and endonucleolytic cleavage at the site of DNA damage. This assembly occurs before the phosphodiester backbone of the damaged strand is cleaved 3' and 5' of the site of DNA damage. [GOC:elh, PMID:10197977]	C5 GO	Homo sapiens	Gene Ontology Consortium
GO_NUCLEOTIDE_EXCISION_REPAIR_PREINCISION_COMPLEX_STABILIZATION	21	The stabilization of the multiprotein complex involved in damage recognition, DNA helix unwinding, and endonucleolytic cleavage at the site of DNA damage as well as the unwound DNA. The stabilization of the protein-DNA complex ensures proper positioning of the preincision complex before the phosphodiester backbone of the damaged strand is cleaved 3' and 5' of the site of DNA damage. [GOC:elh, PMI…	C5 GO	Homo sapiens	Gene Ontology Consortium
GO_POSITIVE_REGULATION_OF_RESPONSE_TO_DNA_DAMAGE_STIMULUS	105	Any process that activates or increases the frequency, rate or extent of response to DNA damage stimulus. [GOC:obol]	C5 GO	Homo sapiens	Gene Ontology Consortium
GO_RECOMBINATIONAL_REPAIR	140	A DNA repair process that involves the exchange, reciprocal or nonreciprocal, of genetic material between the broken DNA molecule and a homologous region of DNA. [GOC:elh]	C5 GO	Homo sapiens	Gene Ontology Consortium
GO_REGULATION_OF_DNA_DAMAGE_CHECKPOINT	17	Any process that modulates the frequency, rate or extent of a DNA damage checkpoint. [GOC:obol]	C5 GO	Homo sapiens	Gene Ontology Consortium
GO_REGULATION_OF_DOUBLE_STRAND_BREAK_REPAIR_VIA_HOMOLOGOUS_RECOMBINATION	47	Any process that modulates the frequency, rate or extent of the error-free repair of a double-strand break in DNA in which the broken DNA molecule is repaired using homologous sequences. [GOC:dph, GOC:jp, GOC:tb]	C5 GO	Homo sapiens	Gene Ontology Consortium
GO_REGULATION_OF_INTRINSIC_APOPTOTIC_SIGNALING_PATHWAY_IN_RESPONSE_TO_DNA_DAMAGE_BY_P53_CLASS_MEDIATOR	18	Any process that modulates the frequency, rate or extent of intrinsic apoptotic signaling pathway in response to DNA damage by p53 class mediator. [GOC:TermGenie, PMID:17719541]	C5 GO	Homo sapiens	Gene Ontology Consortium
GO_REGULATION_OF_RESPONSE_TO_DNA_DAMAGE_MAGE_STIMULUS	226	Any process that modulates the frequency, rate or extent of response to DNA damage stimulus. [GOC:obol]	C5 GO	Homo sapiens	Gene Ontology Consortium
GO_REPLICATION_BORN_DOUBLE_STRAND_BREAK_REPAIR_VIA_SISTER_CHROMATID_EXCHANGE	8	The repair of a replication-born double-strand DNA break in which the DNA molecule is repaired using the homologous sequence of the sister chromatid which serves as a template to repair the breaks. [GOC:rb, PMID:12820977, PMID:16888651]	C5 GO	Homo sapiens	Gene Ontology Consortium
GO_SIGNAL_TRANSDUCTION_IN_RESPONSE_TO_DNA_DAMAGE	133	A cascade of processes induced by the detection of DNA damage within a cell. [GOC:go_curators]	C5 GO	Homo sapiens	Gene Ontology Consortium
GO_SIGNAL_TRANSDUCTION_INVOLVED_IN_G2_DNA_DAMAGE_CHECKPOINT	14	A signal transduction process that contributes to a G2/M transition DNA damage checkpoint. [GOC:mtg_cell_cycle]	C5 GO	Homo sapiens	Gene Ontology Consortium
GO_SITE_OF_DNA_DAMAGE	82	A region of a chromosome at which DNA damage has occurred. DNA damage signaling and repair proteins accumulate at the lesion to respond to the damage and repair the DNA to form a continuous DNA helix. [GOC:pg]	C5 GO	Homo sapiens	Gene Ontology Consortium
GO_SITE_OF_DOUBLE_STRAND_BREAK	61	A region of a chromosome at which a DNA double-strand break has occurred. DNA damage signaling and repair proteins accumulate at the lesion to respond to the damage and repair the DNA to form a continuous DNA helix. [GOC:bf, GOC:mah, GOC:vw, PMID:20096808, PMID:21035408]	C5 GO	Homo sapiens	Gene Ontology Consortium
GO_TRANSCRIPTION_COUPLED_NUCLEOTIDE_EXCISION_REPAIR	73	The nucleotide-excision repair process that carries out preferential repair of DNA lesions on the actively transcribed strand of the DNA duplex. In addition, the transcription-coupled nucleotide-excision repair pathway is required for the recognition and repair of a small subset of lesions that are not recognized by the global genome nucleotide excision repair pathway. [PMID:10197977, PMID:119002…	C5 GO	Homo sapiens	Gene Ontology Consortium
GO_UV_DAMAGE_EXCISION_REPAIR	13	A DNA repair process that is initiated by an endonuclease that introduces a single-strand incision immediately 5' of a UV-induced damage site. UV-damage excision repair acts on both cyclobutane pyrimidine dimers (CPDs) and pyrimidine-pyrimidone 6-4 photoproducts (6-4PPs). [GOC:mah, PMID:9619100]	C5 GO	Homo sapiens	Gene Ontology Consortium
HONRADO_BREAST_CANCER_BRCA1_VS_BRCA2	16	Genes distinguishing between breast cancer tumors bearing mutations in BRCA1 [GeneID=672] and those with mutated BRCA2 [GeneID=675].	C2 CGP	Homo sapiens	MSigDB Team
HP_ABNORMALITY_OF_DNA_REPAIR	17	Abnormality of DNA repair	C5 HPO	Homo sapiens	The Jackson Laboratory (JAX)
HP_DEFECTIVE_DNA_REPAIR_AFTER_ULTRAVIOLET_RADIATION_DAMAGE	13	Defective DNA repair after ultraviolet radiation damage	C5 HPO	Homo sapiens	The Jackson Laboratory (JAX)
HP_DEFECTIVE_DNA_REPAIR_AFTER_ULTRAVIOLET_RADIATION_DAMAGE	13	Defective DNA repair after ultraviolet radiation damage	C5 HPO	Homo sapiens	The Jackson Laboratory (JAX)
HUPER_BREAST_BASAL_VS_LUMINAL_DN	58	Genes down-regulated in basal mammary epithelial cells compared to the luminal ones.	C2 CGP	Homo sapiens	MSigDB Team
HUPER_BREAST_BASAL_VS_LUMINAL_UP	53	Genes up-regulated in basal mammary epithelial cells compared to the luminal ones.	C2 CGP	Homo sapiens	MSigDB Team
IVANOVSKA_MIR106B_TARGETS	88	A consensus set of genes that were significantly down-regulated by MIR106B [GeneID=406900].	C2 CGP	Homo sapiens	MSigDB Team
KANNAN_TP53_TARGETS_DN	22	Primary down-regulated targets of TP53 [GeneID=7157] in the H1299 (lung cancer) cell line.	C2 CGP	Homo sapiens	MSigDB Team
KANNAN_TP53_TARGETS_UP	58	Primary up-regulated targets of TP53 [GeneID=7157] in the H1299 (lung cancer) cell line.	C2 CGP	Homo sapiens	MSigDB Team
KAUFFMANN_DNA_REPAIR_GENES	230	Genes involved in DNA repair, compiled manually by the authors.	C2 CGP	Homo sapiens	MSigDB Team
KAUFFMANN_DNA_REPLICATION_GENES	146	Genes involved in DNA replication, compiled manually by the authors.	C2 CGP	Homo sapiens	MSigDB Team
KAUFFMANN_MELANOMA_RELAPSE_DN	6	DNA repair and replication genes down-regulated in melanoma patients who will relapse vs patients who will not.	C2 CGP	Homo sapiens	MSigDB Team
KAUFFMANN_MELANOMA_RELAPSE_UP	61	DNA repair and replication genes up-regulated in melanoma patients who will relapse vs patients who will not.	C2 CGP	Homo sapiens	MSigDB Team
KEGG_BASE_EXCISION_REPAIR	35	Base excision repair	C2 CP	Homo sapiens	Kyoto Encyclopedia of Genes and Genomes
KEGG_CELL_CYCLE	125	Cell cycle	C2 CP	Homo sapiens	Kyoto Encyclopedia of Genes and Genomes
KEGG_COLORECTAL_CANCER	62	Colorectal cancer	C2 CP	Homo sapiens	Kyoto Encyclopedia of Genes and Genomes
KEGG_HOMOLOGOUS_RECOMBINATION	28	Homologous recombination	C2 CP	Homo sapiens	Kyoto Encyclopedia of Genes and Genomes
KEGG_MISMATCH_REPAIR	23	Mismatch repair	C2 CP	Homo sapiens	Kyoto Encyclopedia of Genes and Genomes
KEGG_NUCLEOTIDE_EXCISION_REPAIR	44	Nucleotide excision repair	C2 CP	Homo sapiens	Kyoto Encyclopedia of Genes and Genomes
KEGG_P53_SIGNALING_PATHWAY	68	p53 signaling pathway	C2 CP	Homo sapiens	Kyoto Encyclopedia of Genes and Genomes
KYNG_DNA_DAMAGE_BY_4NQO	36	Genes specifically responding to 4NQO treatment of primary fibroblasts.	C2 CGP	Homo sapiens	MSigDB Team
KYNG_DNA_DAMAGE_BY_4NQO_OR_GAMMA_RADIATION	15	Genes responding to 4NQO treatment and gamma irradiation.	C2 CGP	Homo sapiens	MSigDB Team
KYNG_DNA_DAMAGE_BY_4NQO_OR_UV	60	4NQO treatment and UV irradiation responding genes.	C2 CGP	Homo sapiens	MSigDB Team
KYNG_DNA_DAMAGE_BY_GAMMA_AND_UV_RADIATION	77	Gamma and UV responding genes.	C2 CGP	Homo sapiens	MSigDB Team
KYNG_DNA_DAMAGE_BY_GAMMA_RADIATION	77	Genes specifically responding to gamma radiation.	C2 CGP	Homo sapiens	MSigDB Team
KYNG_DNA_DAMAGE_BY_UV	54	UV only responding genes in primary fibroblasts from young donors.	C2 CGP	Homo sapiens	MSigDB Team
KYNG_DNA_DAMAGE_DN	182	Genes with GO annotation and down-regulated after DNA damage in cell lines from young donors.	C2 CGP	Homo sapiens	MSigDB Team
KYNG_DNA_DAMAGE_UP	205	Genes with GO annotation and up-regulated after DNA damage in cell lines from young donors.	C2 CGP	Homo sapiens	MSigDB Team
KYNG_ENVIRONMENTAL_STRESS_RESPONSE_DN	17	All common down-regulated stress response genes (Human Environmental Stress Response, H-ESR).	C2 CGP	Homo sapiens	MSigDB Team
KYNG_ENVIRONMENTAL_STRESS_RESPONSE_NOT_BY_4NQO_IN_OLD	12	Human environmental etress response genes not changed in primary fibroblasts from old donors in response to 4NQO treatment.	C2 CGP	Homo sapiens	MSigDB Team
KYNG_ENVIRONMENTAL_STRESS_RESPONSE_NOT_BY_4NQO_IN_WS	37	Human environmental stress response genes not changed in primary fibroblasts from Wilmor syndrom (WS) patients in response to 4NQO treatment.	C2 CGP	Homo sapiens	MSigDB Team
KYNG_ENVIRONMENTAL_STRESS_RESPONSE_NOT_BY_GAMMA_IN_OLD	29	Human environmental stress response (H-ESR) genes not changed in primary fibroblasts from old donors in response to gamma radiation.	C2 CGP	Homo sapiens	MSigDB Team
KYNG_ENVIRONMENTAL_STRESS_RESPONSE_NOT_BY_GAMMA_IN_WS	31	Human environmental stress response genes not changed in primary fibroblasts from Werner syndrom (WS) patients in response to gamma radiation.	C2 CGP	Homo sapiens	MSigDB Team
KYNG_ENVIRONMENTAL_STRESS_RESPONSE_NOT_BY_UV_IN_OLD	23	Human environmental stress response genes not changed in primary fibroblasts from old donors in response to UV radiation.	C2 CGP	Homo sapiens	MSigDB Team
KYNG_ENVIRONMENTAL_STRESS_RESPONSE_NOT_BY_UV_IN_WS	12	Human environmental stress response genes not changed in primary fibroblasts from patients with Warner syndrom (WS) .	C2 CGP	Homo sapiens	MSigDB Team
KYNG_ENVIRONMENTAL_STRESS_RESPONSE_UP	53	All common up-regulated stress response genes (Human Environmental Stress Response, H-ESR).	C2 CGP	Homo sapiens	MSigDB Team
LAU_APOPTOSIS_CDKN2A_DN	5	Genes down-regulated by UV-irradiation in cervical cancer cells after knockdown of CDKN2A [GeneID=1029].	C2 CGP	Homo sapiens	MSigDB Team
LAU_APOPTOSIS_CDKN2A_UP	55	Genes up-regulated by UV-irradiation in cervical cancer cells after knockdown of CDKN2A [GeneID=1029].	C2 CGP	Homo sapiens	MSigDB Team
LU_AGING_BRAIN_DN	153	Age down-regulated genes in the human frontal cortex.	C2 CGP	Homo sapiens	University of Washington
LU_AGING_BRAIN_DN	153	Age down-regulated genes in the human frontal cortex.	C2 CGP	Homo sapiens	University of Washington
LU_AGING_BRAIN_UP	262	Age up-regulated genes in the human frontal cortex.	C2 CGP	Homo sapiens	University of Washington
LU_AGING_BRAIN_UP	262	Age up-regulated genes in the human frontal cortex.	C2 CGP	Homo sapiens	University of Washington
MACLACHLAN_BRCA1_TARGETS_DN	16	Genes down-regulated in SW480 cells (colon cancer with mutated p53 [GeneID=7157]) upon expression of BRCA1 [GeneID=672] off an adenovirus vector.	C2 CGP	Homo sapiens	University of Washington
MACLACHLAN_BRCA1_TARGETS_UP	21	Genes up-regulated in SW480 cells (colon cancer with mutated p53 [GeneID=7157]) upon expression of BRCA1 [GeneID=672] off an adenovirus vector.	C2 CGP	Homo sapiens	University of Washington
MANN_RESPONSE_TO_AMIFOSTINE_DN	9	Genes down-regulated in HCT116 cells (colon cancer) after treatment with amifostine [PubChem=2141] depending on the presence of TP53 [GeneID=7157]: TP53-positive vs TP53-null cells.	C2 CGP	Homo sapiens	MSigDB Team
MANN_RESPONSE_TO_AMIFOSTINE_UP	19	Genes up-regulated in HCT116 cells (colon cancer) after treatment with amifostine [PubChem=2141] depending on the presence of TP53 [GeneID=7157]: TP53-positive vs TP53-null cells.	C2 CGP	Homo sapiens	MSigDB Team
MARTINEZ_RESPONSE_TO_TRABECTEDIN	50	Genes down-regulated by trabectedin [PubChem=3199] and its synthetic analog phthalascidin Pt 650 in HCT116 cells (colon cancer).	C2 CGP	Homo sapiens	University of Washington
MATHEW_FANCONI_ANEMIA_GENES	11	Genes identified with the Fanconi anemia (FA) and the FA pathway.	C2 CGP	Homo sapiens	MSigDB Team
MENSSEN_MYC_TARGETS	0	Genes up-regulated by adenoviral expression of c-MYC [GeneID=4609] in HUVEC cells (umbilical vein endothelium).	ARCHIVED C2_CGP	Homo sapiens	Broad Institute
MODULE_403	46	DNA damage response.	C4 CM	Homo sapiens	Broad Institute
MURAKAMI_UV_RESPONSE_1HR_DN	10	Genes down-regulated in primary keratinocytes at 1 h after UVB irradiation.	C2 CGP	Homo sapiens	MSigDB Team
MURAKAMI_UV_RESPONSE_1HR_UP	15	Genes up-regulated in primary keratinocytes at 1 h after UVB irradiation.	C2 CGP	Homo sapiens	MSigDB Team
MURAKAMI_UV_RESPONSE_24HR	20	Genes down-regulated in primary keratinocytes at 24 h after UVB irradiation.	C2 CGP	Homo sapiens	University of Washington
MURAKAMI_UV_RESPONSE_6HR_DN	21	Genes down-regulated in primary keratinocytes at 6 h after UVB irradiation.	C2 CGP	Homo sapiens	University of Washington
MURAKAMI_UV_RESPONSE_6HR_UP	34	Genes up-regulated in primary keratinocytes at 6 h after UVB irradiation.	C2 CGP	Homo sapiens	University of Washington
NATSUME_RESPONSE_TO_INTERFERON_BETA_DN	51	Genes down-regulated in T98 cells (glioma) 48 h after treatment with interferon beta.	C2 CGP	Homo sapiens	University of Washington
NATSUME_RESPONSE_TO_INTERFERON_BETA_UP	70	Genes up-regulated in T98 cells (glioma) 48 h after treatment with interferon beta.	C2 CGP	Homo sapiens	University of Washington
PHONG_TNF_RESPONSE_NOT_VIA_P38	341	Genes whose expression changes in Calu-6 cells (lung cancer) by TNF [GeneID=7124] were not affected by p38 inhibitor LY479754.	C2 CGP	Homo sapiens	MSigDB Team
PHONG_TNF_RESPONSE_VIA_P38_COMPLETE	225	Genes whose expression changes in Calu-6 cells (lung cancer) by TNF [GeneID=7124] were blocked completely by p38 inhibitor LY479754.	C2 CGP	Homo sapiens	MSigDB Team
PHONG_TNF_RESPONSE_VIA_P38_PARTIAL	164	Genes whose expression changes in Calu-6 cells (lung cancer) by TNF [GeneID=7124] were blocked partially by p38 inhibitor LY479754.	C2 CGP	Homo sapiens	MSigDB Team
PHONG_TNF_TARGETS_DN	8	Genes down-regulated in Calu-6 cells (lung cancer) at 1 h time point after TNF [GeneID=7124] treatment.	C2 CGP	Homo sapiens	MSigDB Team
PHONG_TNF_TARGETS_UP	63	Genes up-regulated in Calu-6 cells (lung cancer) at 1 h time point after TNF [GeneID=7124] treatment.	C2 CGP	Homo sapiens	MSigDB Team
REACTOME_DISEASES_OF_DNA_REPAIR	10	Diseases of DNA repair	C2 CP	Homo sapiens	Reactome
REACTOME_DNA_DAMAGE_BYPASS	48	DNA Damage Bypass	C2 CP	Homo sapiens	Reactome
REACTOME_DNA_DAMAGE_RECOGNITION_IN_GG_NER	38	DNA Damage Recognition in GG-NER	C2 CP	Homo sapiens	Reactome
REACTOME_DNA_DAMAGE_REVERSAL	8	DNA Damage Reversal	C2 CP	Homo sapiens	Reactome
REACTOME_DNA_DOUBLE_STRAND_BREAK_REPAIR	166	DNA Double-Strand Break Repair	C2 CP	Homo sapiens	Reactome
REACTOME_DNA_REPAIR	331	DNA Repair	C2 CP	Homo sapiens	Reactome
REACTOME_G1_S_DNA_DAMAGE_CHECKPOINTS	68	G1/S DNA Damage Checkpoints	C2 CP	Homo sapiens	Reactome
REACTOME_G2_M_DNA_DAMAGE_CHECKPOINT	95	G2/M DNA damage checkpoint	C2 CP	Homo sapiens	Reactome
REACTOME_GAP_FILLING_DNA_REPAIR_SYNTHESIS_AND_LIGATION_IN_GG_NER	25	Gap-filling DNA repair synthesis and ligation in GG-NER	C2 CP	Homo sapiens	Reactome
REACTOME_P53_DEPENDENT_G1_DNA_DAMAGE_RESPONSE	55	Genes involved in p53-Dependent G1 DNA Damage Response	ARCHIVED C2_CP C2_CP:REACTOME	Homo sapiens	Reactome
REACTOME_P53_INDEPENDENT_G1_S_DNA_DAMAGE_CHECKPOINT	49	Genes involved in p53-Independent G1/S DNA damage checkpoint	ARCHIVED C2_CP C2_CP:REACTOME	Homo sapiens	Reactome
REACTOME_RECOGNITION_OF_DNA_DAMAGE_BY_PCNA_CONTAINING_REPLICATION_COMPLEX	30	Recognition of DNA damage by PCNA-containing replication complex	C2 CP	Homo sapiens	Reactome
REACTOME_REPAIR_SYNTHESIS_FOR_GAP_FILLING_BY_DNA_POL_IN_TC_NER	14	Genes involved in Repair synthesis for gap-filling by DNA polymerase in TC-NER	ARCHIVED C2_CP C2_CP:REACTOME	Homo sapiens	Reactome
REACTOME_SUMOYLATION_OF_DNA_DAMAGE_RESPONSE_AND_REPAIR_PROTEINS	77	SUMOylation of DNA damage response and repair proteins	C2 CP	Homo sapiens	Reactome
REACTOME_TP53_REGULATES_TRANSCRIPTION_OF_DNA_REPAIR_GENES	62	TP53 Regulates Transcription of DNA Repair Genes	C2 CP	Homo sapiens	Reactome
REN_BOUND_BY_E2F	62	Genes whose promoters were bound by E2F1 and E2F4 [GeneID=1869;1874] in the primary fibroblasts WI-38, by ChIP on chip assay.	C2 CGP	Homo sapiens	Broad Institute
SCHAVOLT_TARGETS_OF_TP53_AND_TP63	15	Genes up-regulated by TP53 [GeneID=7157] and down-regulated by an isoform of TP63 [GeneID=8626] in primary HEK cells (epidermal keratinocytes).	C2 CGP	Homo sapiens	MSigDB Team
SCIAN_CELL_CYCLE_TARGETS_OF_TP53_AND_TP73_DN	22	Cell cycle genes down-regulated in H1299 cells (lung cancer) after overexpression of either P53 or P73 [GeneID=7157;7161].	C2 CGP	Homo sapiens	MSigDB Team
SCIAN_CELL_CYCLE_TARGETS_OF_TP53_AND_TP73_UP	9	Cell cycle genes up-regulated in H1299 cells (lung cancer) after overexpression of either P53 or P73 [GeneID=7157;7161].	C2 CGP	Homo sapiens	MSigDB Team
SCIAN_INVERSED_TARGETS_OF_TP53_AND_TP73_DN	30	Genes that were inversely correlated in H1299 cells (lung cancer): down-regulated by P53 [GeneID=7157] and up-regulated by P73 [GeneID=7161].	C2 CGP	Homo sapiens	MSigDB Team
SCIAN_INVERSED_TARGETS_OF_TP53_AND_TP73_UP	11	Genes that were inversely correlated in H1299 cells (lung cancer): up-regulated by P53 [GeneID=7157] and down-regulated by P73 [GeneID=7161].	C2 CGP	Homo sapiens	MSigDB Team
TCGA_GLIOBLASTOMA_COPY_NUMBER_DN	31	Genes down-regulated and displaying decreased copy number in glioblastoma samples.	C2 CGP	Homo sapiens	MSigDB Team
TCGA_GLIOBLASTOMA_COPY_NUMBER_UP	75	Genes up-regulated and displaying increased copy number in glioblastoma samples.	C2 CGP	Homo sapiens	MSigDB Team
TCGA_GLIOBLASTOMA_MUTATED	8	Genes significantly mutated in 91 glioblastoma samples.	C2 CGP	Homo sapiens	MSigDB Team
TSAI_RESPONSE_TO_IONIZING_RADIATION	150	Genes up-regulated in TK6, WTK1, and NH32 cell lines (lymphoblast) in response to ionizing radiation.	C2 CGP	Homo sapiens	MSigDB Team
WAKASUGI_HAVE_ZNF143_BINDING_SITES	54	DNA repair genes whose promoters contain putative ZNF143 [GeneID=7702] binding sites.	C2 CGP	Homo sapiens	MSigDB Team
WANG_CISPLATIN_RESPONSE_AND_XPC_DN	219	Genes down-regulated in fibroblasts with defective XPC [GeneID=7508] in response to cisplatin [PubChem=2767].	C2 CGP	Homo sapiens	University of Washington
WANG_CISPLATIN_RESPONSE_AND_XPC_UP	185	Genes up-regulated in fibroblasts with defective XPC [GeneID=7508] in response to cisplatin [PubChem=2767].	C2 CGP	Homo sapiens	University of Washington
WATANABE_COLON_CANCER_MSI_VS_MSS_DN	69	Down-regulated genes discriminating between MSI (microsatellite instability) and MSS (microsatellite stability) colon cancers.	C2 CGP	Homo sapiens	MSigDB Team
WATANABE_COLON_CANCER_MSI_VS_MSS_UP	29	Up-regulated genes discriminating between MSI (microsatellite instability) and MSS (microsatellite stability) colon cancers.	C2 CGP	Homo sapiens	MSigDB Team
WP_DNA_DAMAGE_RESPONSE	69	DNA Damage Response	C2 CP	Homo sapiens	WikiPathways
WP_DNA_DAMAGE_RESPONSE_ONLY_ATM_DEPENDENDENT	114	DNA Damage Response (only ATM dependent)	C2 CP	Homo sapiens	WikiPathways
WP_DNA_MISMATCH_REPAIR	23	DNA Mismatch Repair	C2 CP	Homo sapiens	WikiPathways
WP_MIRNA_REGULATION_OF_DNA_DAMAGE_RESPONSE	93	miRNA Regulation of DNA Damage Response	C2 CP	Homo sapiens	WikiPathways
WP_MIRNAS_INVOLVED_IN_DNA_DAMAGE_RESPONSE	50	miRNAs involved in DNA damage response	C2 CP	Homo sapiens	WikiPathways
ZERBINI_RESPONSE_TO_SULINDAC_DN	6	Selected genes down-regulated in DU145 and PC-3 cells (prostate cancer) after treatment with the NSAID (non-steroid anti-inflammatory drug) sulindac [PubChem=5352].	C2 CGP	Homo sapiens	MSigDB Team
ZERBINI_RESPONSE_TO_SULINDAC_UP	9	Selected genes up-regulated in DU145 and PC-3 cells (prostate cancer) after treatment with the NSAID (non-steroid anti-inflammatory drug) sulindac [PubChem=5352].	C2 CGP	Homo sapiens	MSigDB Team
ZHANG_RESPONSE_TO_CANTHARIDIN_DN	67	Genes down-regulated in HL-60 cells (promyeloid leukemia) by cantharidin [PubChem=6708701].	C2 CGP	Homo sapiens	University of Washington
ZHANG_RESPONSE_TO_CANTHARIDIN_UP	15	Genes up-regulated in HL-60 cells (promyeloid leukemia) by cantharidin [PubChem=6708701].	C2 CGP	Homo sapiens	University of Washington
ZHOU_CELL_CYCLE_GENES_IN_IR_RESPONSE_24HR	126	Cell cycle genes significantly (p =< 0.05) changed in fibroblast cells at 24 h after exposure to ionizing radiation.	C2 CGP	Homo sapiens	Dana-Farber Cancer Institute
ZHOU_CELL_CYCLE_GENES_IN_IR_RESPONSE_2HR	8	Cell cycle genes significantly (p =< 0.05) changed in fibroblast cells at 2 h after exposure to ionizing radiation.	C2 CGP	Homo sapiens	Dana-Farber Cancer Institute
ZHOU_CELL_CYCLE_GENES_IN_IR_RESPONSE_6HR	84	Cell cycle genes significantly (p =< 0.05) changed in fibroblast cells at 6 h after exposure to ionizing radiation.	C2 CGP	Homo sapiens	Dana-Farber Cancer Institute

## Sheet: total genes
	beta	HR	(95% CI for HR)	wald.test	p.value	HR.confint.lower	HR.confint.upper	HR.CI
ANKLE1	0.53	1.7	(1.36-2.11)	22.7	1.93e-06	1.36	2.11	1.7 (1.36-2.11)
MORC2	0.16	1.17	(1.09-1.26)	18	2.25e-05	1.09	1.26	1.17 (1.09-1.26)
C1orf61	3.1	23.1	(5.34-99.9)	17.7	2.63e-05	5.34	99.9	23.1 (5.34-99.9)
TSPYL2	0.21	1.23	(1.12-1.36)	17.4	3.02e-05	1.12	1.36	1.23 (1.12-1.36)
TAF1C	0.12	1.13	(1.06-1.2)	15.5	8.11e-05	1.06	1.2	1.13 (1.06-1.2)
MC1R	0.27	1.31	(1.14-1.51)	14.8	0.000122	1.14	1.51	1.31 (1.14-1.51)
EYA2	0.079	1.08	(1.04-1.13)	14.5	0.000138	1.04	1.13	1.08 (1.04-1.13)
HPCA	0.28	1.33	(1.15-1.54)	14.2	0.000161	1.15	1.54	1.33 (1.15-1.54)
TAOK2	0.17	1.19	(1.08-1.3)	13.8	0.000198	1.08	1.3	1.19 (1.08-1.3)
MAPK12	0.27	1.31	(1.14-1.52)	13.5	0.000239	1.14	1.52	1.31 (1.14-1.52)
REXO4	0.062	1.06	(1.03-1.1)	13.2	0.000277	1.03	1.1	1.06 (1.03-1.1)
RBM17	0.091	1.1	(1.04-1.15)	13.2	0.000281	1.04	1.15	1.1 (1.04-1.15)
DDX11	0.16	1.18	(1.08-1.29)	13	0.000309	1.08	1.29	1.18 (1.08-1.29)
CRY2	0.18	1.19	(1.08-1.32)	12.3	0.000447	1.08	1.32	1.19 (1.08-1.32)
CCNB3	1.9	6.94	(2.31-20.8)	12	0.000543	2.31	20.8	6.94 (2.31-20.8)
DVL3	0.065	1.07	(1.03-1.11)	11.9	0.000554	1.03	1.11	1.07 (1.03-1.11)
TRIM32	0.22	1.25	(1.1-1.41)	11.9	0.000557	1.1	1.41	1.25 (1.1-1.41)
TCF7L1	0.31	1.37	(1.14-1.64)	11.6	0.000669	1.14	1.64	1.37 (1.14-1.64)
SUPT5H	0.055	1.06	(1.02-1.09)	11.5	0.000692	1.02	1.09	1.06 (1.02-1.09)
NGF	0.6	1.83	(1.29-2.61)	11.2	0.000808	1.29	2.61	1.83 (1.29-2.61)
SNAI1	0.11	1.12	(1.05-1.19)	10.9	0.000955	1.05	1.19	1.12 (1.05-1.19)
CD36	0.14	1.15	(1.06-1.25)	10.4	0.00123	1.06	1.25	1.15 (1.06-1.25)
PAXX	0.016	1.02	(1.01-1.03)	10.2	0.00136	1.01	1.03	1.02 (1.01-1.03)
IRF7	0.033	1.03	(1.01-1.06)	10.1	0.00147	1.01	1.06	1.03 (1.01-1.06)
MAGEF1	0.036	1.04	(1.01-1.06)	10	0.00155	1.01	1.06	1.04 (1.01-1.06)
AGPAT1	0.064	1.07	(1.02-1.11)	9.99	0.00157	1.02	1.11	1.07 (1.02-1.11)
ATF7	1.1	3.08	(1.53-6.22)	9.87	0.00168	1.53	6.22	3.08 (1.53-6.22)
COPS7A	0.05	1.05	(1.02-1.09)	9.76	0.00178	1.02	1.09	1.05 (1.02-1.09)
CNOT3	0.11	1.11	(1.04-1.19)	9.71	0.00183	1.04	1.19	1.11 (1.04-1.19)
ISY1	0.18	1.19	(1.07-1.34)	9.52	0.00203	1.07	1.34	1.19 (1.07-1.34)
PARP10	0.036	1.04	(1.01-1.06)	9.43	0.00213	1.01	1.06	1.04 (1.01-1.06)
WNT7A	0.56	1.75	(1.22-2.51)	9.32	0.00226	1.22	2.51	1.75 (1.22-2.51)
IGFBP3	0.0058	1.01	(1-1.01)	9.01	0.00269	1	1.01	1.01 (1-1.01)
WNT16	0.99	2.69	(1.41-5.13)	8.97	0.00275	1.41	5.13	2.69 (1.41-5.13)
BOK	0.033	1.03	(1.01-1.06)	8.97	0.00275	1.01	1.06	1.03 (1.01-1.06)
SWI5	0.089	1.09	(1.03-1.16)	8.89	0.00286	1.03	1.16	1.09 (1.03-1.16)
CDC42	-0.015	0.985	(0.976-0.995)	8.86	0.00292	0.976	0.995	0.985 (0.976-0.995)
RHNO1	0.021	1.02	(1.01-1.04)	8.77	0.00307	1.01	1.04	1.02 (1.01-1.04)
HDAC7	0.12	1.12	(1.04-1.21)	8.73	0.00314	1.04	1.21	1.12 (1.04-1.21)
CNOT7	-0.12	0.886	(0.818-0.96)	8.72	0.00314	0.818	0.96	0.886 (0.818-0.96)
PIDD1	0.14	1.15	(1.05-1.26)	8.69	0.0032	1.05	1.26	1.15 (1.05-1.26)
EEPD1	0.054	1.06	(1.02-1.09)	8.65	0.00328	1.02	1.09	1.06 (1.02-1.09)
TERT	0.34	1.4	(1.12-1.75)	8.45	0.00365	1.12	1.75	1.4 (1.12-1.75)
KMT5C	0.17	1.18	(1.06-1.32)	8.41	0.00374	1.06	1.32	1.18 (1.06-1.32)
POLG	0.063	1.07	(1.02-1.11)	8.29	0.00399	1.02	1.11	1.07 (1.02-1.11)
FOXM1	0.011	1.01	(1-1.02)	8.29	0.00399	1	1.02	1.01 (1-1.02)
MTA1	0.074	1.08	(1.02-1.13)	8.02	0.00462	1.02	1.13	1.08 (1.02-1.13)
WNT3A	0.57	1.78	(1.19-2.65)	7.99	0.00469	1.19	2.65	1.78 (1.19-2.65)
PHF1	0.052	1.05	(1.02-1.09)	7.95	0.00481	1.02	1.09	1.05 (1.02-1.09)
TREX2	1.2	3.16	(1.42-7.04)	7.95	0.00482	1.42	7.04	3.16 (1.42-7.04)
NEK4	-0.24	0.786	(0.664-0.929)	7.95	0.00482	0.664	0.929	0.786 (0.664-0.929)
DAXX	0.04	1.04	(1.01-1.07)	7.91	0.00493	1.01	1.07	1.04 (1.01-1.07)
IL11RA	0.26	1.3	(1.08-1.56)	7.88	0.00501	1.08	1.56	1.3 (1.08-1.56)
POLM	0.087	1.09	(1.03-1.16)	7.86	0.00504	1.03	1.16	1.09 (1.03-1.16)
FBH1	0.12	1.13	(1.04-1.22)	7.83	0.00515	1.04	1.22	1.13 (1.04-1.22)
NFATC4	0.26	1.29	(1.08-1.55)	7.72	0.00545	1.08	1.55	1.29 (1.08-1.55)
MBD2	-0.078	0.925	(0.875-0.978)	7.45	0.00634	0.875	0.978	0.925 (0.875-0.978)
DLX4	0.74	2.09	(1.23-3.56)	7.4	0.00651	1.23	3.56	2.09 (1.23-3.56)
BLK	0.43	1.53	(1.13-2.09)	7.4	0.00653	1.13	2.09	1.53 (1.13-2.09)
FAAP20	0.17	1.19	(1.05-1.35)	7.13	0.00757	1.05	1.35	1.19 (1.05-1.35)
EFNB3	0.34	1.4	(1.09-1.8)	7.1	0.00773	1.09	1.8	1.4 (1.09-1.8)
RBM3	-0.0085	0.992	(0.985-0.998)	7.07	0.00786	0.985	0.998	0.992 (0.985-0.998)
FLOT1	0.013	1.01	(1-1.02)	6.89	0.00869	1	1.02	1.01 (1-1.02)
GLRX	-0.072	0.931	(0.882-0.983)	6.75	0.00936	0.882	0.983	0.931 (0.882-0.983)
TERF2IP	0.063	1.07	(1.02-1.12)	6.74	0.00941	1.02	1.12	1.07 (1.02-1.12)
ZNF385A	0.042	1.04	(1.01-1.08)	6.69	0.00968	1.01	1.08	1.04 (1.01-1.08)
ELL	0.17	1.19	(1.04-1.35)	6.66	0.00989	1.04	1.35	1.19 (1.04-1.35)
MUTYH	0.11	1.11	(1.03-1.21)	6.65	0.00989	1.03	1.21	1.11 (1.03-1.21)
TPM1	-0.021	0.979	(0.963-0.995)	6.61	0.0101	0.963	0.995	0.979 (0.963-0.995)
PMS2P4	0.58	1.78	(1.15-2.76)	6.61	0.0102	1.15	2.76	1.78 (1.15-2.76)
PRKD2	0.056	1.06	(1.01-1.1)	6.6	0.0102	1.01	1.1	1.06 (1.01-1.1)
PIAS4	0.11	1.12	(1.03-1.22)	6.57	0.0104	1.03	1.22	1.12 (1.03-1.22)
CDK9	0.046	1.05	(1.01-1.09)	6.55	0.0105	1.01	1.09	1.05 (1.01-1.09)
NSMCE1	0.03	1.03	(1.01-1.05)	6.46	0.011	1.01	1.05	1.03 (1.01-1.05)
DVL2	0.11	1.12	(1.03-1.22)	6.45	0.0111	1.03	1.22	1.12 (1.03-1.22)
RECQL5	0.2	1.23	(1.05-1.44)	6.4	0.0114	1.05	1.44	1.23 (1.05-1.44)
CDKN2A	0.033	1.03	(1.01-1.06)	6.39	0.0114	1.01	1.06	1.03 (1.01-1.06)
NFKB2	0.031	1.03	(1.01-1.06)	6.38	0.0115	1.01	1.06	1.03 (1.01-1.06)
POLR2H	0.031	1.03	(1.01-1.06)	6.34	0.0118	1.01	1.06	1.03 (1.01-1.06)
SMUG1	0.16	1.17	(1.04-1.32)	6.32	0.0119	1.04	1.32	1.17 (1.04-1.32)
PPP1R15A	0.01	1.01	(1-1.02)	6.24	0.0125	1	1.02	1.01 (1-1.02)
CSNK1E	0.047	1.05	(1.01-1.09)	6.2	0.0128	1.01	1.09	1.05 (1.01-1.09)
PCGF2	0.039	1.04	(1.01-1.07)	6.17	0.013	1.01	1.07	1.04 (1.01-1.07)
WRNIP1	0.046	1.05	(1.01-1.09)	6.12	0.0133	1.01	1.09	1.05 (1.01-1.09)
RUVBL1	0.068	1.07	(1.01-1.13)	6.11	0.0135	1.01	1.13	1.07 (1.01-1.13)
HDAC10	0.15	1.16	(1.03-1.31)	6.03	0.014	1.03	1.31	1.16 (1.03-1.31)
MAPT	0.87	2.38	(1.19-4.75)	6.01	0.0143	1.19	4.75	2.38 (1.19-4.75)
ERCC3	0.17	1.18	(1.03-1.35)	5.92	0.015	1.03	1.35	1.18 (1.03-1.35)
CSNK1A1	-0.07	0.932	(0.88-0.987)	5.85	0.0156	0.88	0.987	0.932 (0.88-0.987)
NUP214	0.12	1.13	(1.02-1.24)	5.8	0.016	1.02	1.24	1.13 (1.02-1.24)
IGF1	0.78	2.18	(1.16-4.12)	5.79	0.0161	1.16	4.12	2.18 (1.16-4.12)
TIGAR	0.013	1.01	(1-1.02)	5.77	0.0163	1	1.02	1.01 (1-1.02)
SCD	0.0032	1	(1-1.01)	5.74	0.0166	1	1.01	1 (1-1.01)
MYO6	-0.048	0.953	(0.916-0.991)	5.73	0.0167	0.916	0.991	0.953 (0.916-0.991)
CCNG1	-0.015	0.985	(0.974-0.997)	5.71	0.0169	0.974	0.997	0.985 (0.974-0.997)
LSP1P4	0.3	1.34	(1.05-1.71)	5.69	0.0171	1.05	1.71	1.34 (1.05-1.71)
BATF	0.029	1.03	(1.01-1.05)	5.65	0.0174	1.01	1.05	1.03 (1.01-1.05)
FOSL1	0.016	1.02	(1-1.03)	5.63	0.0177	1	1.03	1.02 (1-1.03)
CIDEB	3.4	30.2	(1.81-505)	5.62	0.0177	1.81	505	30.2 (1.81-505)
APAF1	-0.15	0.863	(0.764-0.975)	5.58	0.0182	0.764	0.975	0.863 (0.764-0.975)
ENDOV	0.34	1.41	(1.06-1.87)	5.56	0.0184	1.06	1.87	1.41 (1.06-1.87)
RIN2	0.039	1.04	(1.01-1.07)	5.48	0.0192	1.01	1.07	1.04 (1.01-1.07)
NFRKB	0.12	1.13	(1.02-1.26)	5.48	0.0192	1.02	1.26	1.13 (1.02-1.26)
EME1	0.27	1.32	(1.04-1.66)	5.43	0.0197	1.04	1.66	1.32 (1.04-1.66)
NELFB	0.01	1.01	(1-1.02)	5.41	0.02	1	1.02	1.01 (1-1.02)
INO80E	0.064	1.07	(1.01-1.13)	5.31	0.0213	1.01	1.13	1.07 (1.01-1.13)
ADAM11	1.1	3.06	(1.18-7.92)	5.29	0.0215	1.18	7.92	3.06 (1.18-7.92)
NT5M	0.27	1.31	(1.04-1.65)	5.25	0.022	1.04	1.65	1.31 (1.04-1.65)
RAD9A	0.11	1.11	(1.02-1.22)	5.2	0.0226	1.02	1.22	1.11 (1.02-1.22)
SUMO3	0.016	1.02	(1-1.03)	5.2	0.0226	1	1.03	1.02 (1-1.03)
MYBBP1A	0.035	1.04	(1-1.07)	5.15	0.0232	1	1.07	1.04 (1-1.07)
BCL2L10	0.19	1.21	(1.02-1.43)	5	0.0253	1.02	1.43	1.21 (1.02-1.43)
XAB2	0.025	1.03	(1-1.05)	4.93	0.0264	1	1.05	1.03 (1-1.05)
FAS	-0.083	0.92	(0.855-0.991)	4.9	0.0268	0.855	0.991	0.92 (0.855-0.991)
POLRMT	0.03	1.03	(1-1.06)	4.85	0.0276	1	1.06	1.03 (1-1.06)
CEP164	0.24	1.27	(1.02-1.57)	4.77	0.0289	1.02	1.57	1.27 (1.02-1.57)
SMC1B	0.32	1.38	(1.03-1.84)	4.75	0.0293	1.03	1.84	1.38 (1.03-1.84)
FUS	0.021	1.02	(1-1.04)	4.68	0.0306	1	1.04	1.02 (1-1.04)
HINFP	0.3	1.35	(1.03-1.78)	4.67	0.0307	1.03	1.78	1.35 (1.03-1.78)
CCNA1	0.52	1.67	(1.05-2.68)	4.66	0.0309	1.05	2.68	1.67 (1.05-2.68)
CDC25C	-0.15	0.862	(0.752-0.987)	4.59	0.0321	0.752	0.987	0.862 (0.752-0.987)
MYO5B	-0.04	0.961	(0.926-0.997)	4.58	0.0323	0.926	0.997	0.961 (0.926-0.997)
MMS19	0.065	1.07	(1.01-1.13)	4.57	0.0325	1.01	1.13	1.07 (1.01-1.13)
FIGNL2	2.5	11.7	(1.22-112)	4.54	0.0332	1.22	112	11.7 (1.22-112)
WNT5A	-0.091	0.913	(0.839-0.993)	4.49	0.0341	0.839	0.993	0.913 (0.839-0.993)
TMEM109	0.018	1.02	(1-1.03)	4.45	0.0348	1	1.03	1.02 (1-1.03)
TERF2	0.12	1.12	(1.01-1.25)	4.43	0.0353	1.01	1.25	1.12 (1.01-1.25)
ACE	0.06	1.06	(1-1.12)	4.42	0.0354	1	1.12	1.06 (1-1.12)
SEMA4D	0.14	1.15	(1.01-1.31)	4.4	0.0359	1.01	1.31	1.15 (1.01-1.31)
ACTR3	-0.032	0.968	(0.94-0.998)	4.4	0.036	0.94	0.998	0.968 (0.94-0.998)
CCNB1	-0.012	0.988	(0.976-0.999)	4.4	0.036	0.976	0.999	0.988 (0.976-0.999)
WNT7B	0.14	1.15	(1.01-1.31)	4.39	0.0362	1.01	1.31	1.15 (1.01-1.31)
MDM2	-0.074	0.929	(0.867-0.995)	4.38	0.0363	0.867	0.995	0.929 (0.867-0.995)
RAD23A	0.015	1.01	(1-1.03)	4.35	0.0369	1	1.03	1.01 (1-1.03)
PPP2CB	-0.039	0.962	(0.927-0.998)	4.33	0.0375	0.927	0.998	0.962 (0.927-0.998)
RAB7A	0.0086	1.01	(1-1.02)	4.32	0.0377	1	1.02	1.01 (1-1.02)
SEMA7A	0.062	1.06	(1-1.13)	4.31	0.0379	1	1.13	1.06 (1-1.13)
REC8	0.03	1.03	(1-1.06)	4.31	0.038	1	1.06	1.03 (1-1.06)
POLD3	-0.11	0.893	(0.802-0.994)	4.31	0.038	0.802	0.994	0.893 (0.802-0.994)
TYMP	0.005	1	(1-1.01)	4.28	0.0385	1	1.01	1 (1-1.01)
MAPK8	-0.17	0.841	(0.714-0.992)	4.24	0.0396	0.714	0.992	0.841 (0.714-0.992)
ELL3	0.4	1.49	(1.02-2.17)	4.24	0.0396	1.02	2.17	1.49 (1.02-2.17)
ITPKB	0.11	1.12	(1.01-1.25)	4.23	0.0397	1.01	1.25	1.12 (1.01-1.25)
RAC3	0.05	1.05	(1-1.1)	4.22	0.04	1	1.1	1.05 (1-1.1)
EGFR	0.035	1.04	(1-1.07)	4.21	0.0401	1	1.07	1.04 (1-1.07)
TNKS1BP1	0.029	1.03	(1-1.06)	4.21	0.0402	1	1.06	1.03 (1-1.06)
AATF	0.014	1.01	(1-1.03)	4.19	0.0407	1	1.03	1.01 (1-1.03)
SPIRE2	0.043	1.04	(1-1.09)	4.14	0.0418	1	1.09	1.04 (1-1.09)
BAG6	0.014	1.01	(1-1.03)	4.12	0.0424	1	1.03	1.01 (1-1.03)
MEN1	0.05	1.05	(1-1.1)	4.11	0.0427	1	1.1	1.05 (1-1.1)
COPS7B	0.1	1.11	(1-1.22)	4.09	0.0431	1	1.22	1.11 (1-1.22)
CCL28	-0.044	0.957	(0.917-0.999)	4.07	0.0435	0.917	0.999	0.957 (0.917-0.999)
PTTG1IP	0.0082	1.01	(1-1.02)	4.06	0.0438	1	1.02	1.01 (1-1.02)
CRIP1	0.077	1.08	(1-1.16)	4.02	0.0449	1	1.16	1.08 (1-1.16)
FNIP2	-0.099	0.906	(0.821-0.999)	3.95	0.0469	0.821	0.999	0.906 (0.821-0.999)
PTTG3P	-0.57	0.565	(0.322-0.993)	3.94	0.0471	0.322	0.993	0.565 (0.322-0.993)
CTNNB1	-0.0067	0.993	(0.987-1)	3.93	0.0474	0.987	1	0.993 (0.987-1)
NUP54	-0.056	0.946	(0.895-0.999)	3.92	0.0477	0.895	0.999	0.946 (0.895-0.999)
POLL	0.11	1.12	(1-1.26)	3.86	0.0494	1	1.26	1.12 (1-1.26)
UBE2D2	-0.028	0.972	(0.945-1)	3.85	0.0497	0.945	1	0.972 (0.945-1)
PSMF1	0.015	1.02	(1-1.03)	3.84	0.05	1	1.03	1.02 (1-1.03)
PSMD6	-0.11	0.892	(0.795-1)	3.82	0.0506	0.795	1	0.892 (0.795-1)
ALKBH2	0.062	1.06	(1-1.13)	3.8	0.0511	1	1.13	1.06 (1-1.13)
MUS81	0.091	1.1	(0.999-1.2)	3.77	0.0523	0.999	1.2	1.1 (0.999-1.2)
AP5Z1	0.04	1.04	(1-1.08)	3.76	0.0526	1	1.08	1.04 (1-1.08)
SSR3	-0.014	0.987	(0.973-1)	3.76	0.0526	0.973	1	0.987 (0.973-1)
IGHMBP2	0.19	1.21	(0.998-1.47)	3.76	0.0526	0.998	1.47	1.21 (0.998-1.47)
PIK3CD	0.12	1.12	(0.998-1.26)	3.7	0.0543	0.998	1.26	1.12 (0.998-1.26)
IL16	0.27	1.32	(0.995-1.74)	3.7	0.0543	0.995	1.74	1.32 (0.995-1.74)
PSMD4	0.012	1.01	(1-1.02)	3.69	0.0548	1	1.02	1.01 (1-1.02)
PAGR1	0.1	1.11	(0.998-1.23)	3.69	0.0549	0.998	1.23	1.11 (0.998-1.23)
MYT1	0.43	1.54	(0.99-2.39)	3.67	0.0553	0.99	2.39	1.54 (0.99-2.39)
UPF1	0.034	1.03	(0.999-1.07)	3.66	0.0556	0.999	1.07	1.03 (0.999-1.07)
RING1	0.027	1.03	(0.999-1.06)	3.65	0.0559	0.999	1.06	1.03 (0.999-1.06)
NUP62	0.042	1.04	(0.999-1.09)	3.63	0.0567	0.999	1.09	1.04 (0.999-1.09)
CRABP2	0.0094	1.01	(1-1.02)	3.62	0.057	1	1.02	1.01 (1-1.02)
TDG	-0.12	0.89	(0.79-1)	3.61	0.0574	0.79	1	0.89 (0.79-1)
PARPBP	-0.1	0.904	(0.815-1)	3.6	0.0578	0.815	1	0.904 (0.815-1)
CXADR	-0.023	0.978	(0.955-1)	3.59	0.058	0.955	1	0.978 (0.955-1)
ANKRD1	0.69	1.99	(0.976-4.06)	3.59	0.0583	0.976	4.06	1.99 (0.976-4.06)
KDM4D	1.3	3.85	(0.943-15.8)	3.53	0.0604	0.943	15.8	3.85 (0.943-15.8)
TANK	-0.087	0.917	(0.837-1)	3.52	0.0608	0.837	1	0.917 (0.837-1)
POLR2J	0.012	1.01	(0.999-1.03)	3.5	0.0613	0.999	1.03	1.01 (0.999-1.03)
HTRA2	0.076	1.08	(0.996-1.17)	3.48	0.0621	0.996	1.17	1.08 (0.996-1.17)
PMS2P1	0.063	1.06	(0.997-1.14)	3.47	0.0624	0.997	1.14	1.06 (0.997-1.14)
RAD51D	0.25	1.29	(0.987-1.68)	3.46	0.0629	0.987	1.68	1.29 (0.987-1.68)
GADD45B	0.025	1.03	(0.999-1.05)	3.46	0.0629	0.999	1.05	1.03 (0.999-1.05)
UIMC1	-0.14	0.872	(0.755-1.01)	3.42	0.0642	0.755	1.01	0.872 (0.755-1.01)
CCNH	-0.079	0.924	(0.85-1)	3.42	0.0643	0.85	1	0.924 (0.85-1)
ACTR8	-0.12	0.885	(0.778-1.01)	3.41	0.0647	0.778	1.01	0.885 (0.778-1.01)
DSC2	-0.04	0.961	(0.921-1)	3.41	0.0647	0.921	1	0.961 (0.921-1)
GNPNAT1	-0.028	0.973	(0.945-1)	3.41	0.0648	0.945	1	0.973 (0.945-1)
CENPE	-0.14	0.871	(0.751-1.01)	3.39	0.0656	0.751	1.01	0.871 (0.751-1.01)
POLR2D	0.079	1.08	(0.995-1.18)	3.39	0.0656	0.995	1.18	1.08 (0.995-1.18)
SEC23A	-0.051	0.95	(0.899-1)	3.39	0.0657	0.899	1	0.95 (0.899-1)
SLC6A1	0.59	1.81	(0.962-3.39)	3.39	0.0657	0.962	3.39	1.81 (0.962-3.39)
E2F4	0.019	1.02	(0.999-1.04)	3.37	0.0662	0.999	1.04	1.02 (0.999-1.04)
WAS	0.064	1.07	(0.995-1.14)	3.35	0.0672	0.995	1.14	1.07 (0.995-1.14)
TWF1	-0.02	0.98	(0.96-1)	3.35	0.0672	0.96	1	0.98 (0.96-1)
HMGB1P40	-1.9	0.149	(0.0193-1.15)	3.34	0.0677	0.0193	1.15	0.149 (0.0193-1.15)
UBE2D3	-0.026	0.975	(0.948-1)	3.33	0.0681	0.948	1	0.975 (0.948-1)
IRF3	0.026	1.03	(0.998-1.06)	3.31	0.0688	0.998	1.06	1.03 (0.998-1.06)
ISG15	0.0021	1	(1-1)	3.31	0.0688	1	1	1 (1-1)
TENT4A	0.082	1.09	(0.994-1.19)	3.31	0.0689	0.994	1.19	1.09 (0.994-1.19)
CLOCK	-0.081	0.923	(0.846-1.01)	3.3	0.0691	0.846	1.01	0.923 (0.846-1.01)
KDM4B	0.16	1.17	(0.987-1.4)	3.3	0.0692	0.987	1.4	1.17 (0.987-1.4)
CDK5RAP3	0.023	1.02	(0.998-1.05)	3.3	0.0695	0.998	1.05	1.02 (0.998-1.05)
CDK5	0.061	1.06	(0.995-1.14)	3.29	0.0696	0.995	1.14	1.06 (0.995-1.14)
CYBB	-0.02	0.98	(0.959-1)	3.27	0.0704	0.959	1	0.98 (0.959-1)
FOXO1	-0.054	0.947	(0.893-1)	3.27	0.0705	0.893	1	0.947 (0.893-1)
SOD2	-0.016	0.984	(0.967-1)	3.26	0.0708	0.967	1	0.984 (0.967-1)
ASCC3	-0.08	0.923	(0.846-1.01)	3.26	0.0712	0.846	1.01	0.923 (0.846-1.01)
MAD1L1	0.1	1.11	(0.991-1.23)	3.24	0.0718	0.991	1.23	1.11 (0.991-1.23)
HRAS	0.014	1.01	(0.999-1.03)	3.23	0.0721	0.999	1.03	1.01 (0.999-1.03)
OTUB2	-0.15	0.857	(0.724-1.01)	3.23	0.0724	0.724	1.01	0.857 (0.724-1.01)
SLC30A9	-0.044	0.957	(0.913-1)	3.21	0.0731	0.913	1	0.957 (0.913-1)
NOP53	0.0055	1.01	(0.999-1.01)	3.2	0.0738	0.999	1.01	1.01 (0.999-1.01)
RNF113A	0.025	1.02	(0.998-1.05)	3.18	0.0745	0.998	1.05	1.02 (0.998-1.05)
PSMC3	0.0081	1.01	(0.999-1.02)	3.18	0.0746	0.999	1.02	1.01 (0.999-1.02)
RCHY1	-0.12	0.884	(0.771-1.01)	3.18	0.0747	0.771	1.01	0.884 (0.771-1.01)
SFPQ	-0.017	0.983	(0.965-1)	3.16	0.0756	0.965	1	0.983 (0.965-1)
MAP3K20	-0.043	0.958	(0.914-1)	3.15	0.0758	0.914	1	0.958 (0.914-1)
MSX1	0.024	1.02	(0.997-1.05)	3.15	0.0759	0.997	1.05	1.02 (0.997-1.05)
PIAS2	-0.21	0.807	(0.637-1.02)	3.15	0.076	0.637	1.02	0.807 (0.637-1.02)
PLD6	0.16	1.17	(0.984-1.39)	3.14	0.0764	0.984	1.39	1.17 (0.984-1.39)
KCNK1	0.026	1.03	(0.997-1.06)	3.14	0.0766	0.997	1.06	1.03 (0.997-1.06)
ORC1	-0.071	0.931	(0.861-1.01)	3.13	0.0768	0.861	1.01	0.931 (0.861-1.01)
NDRG1	0.0063	1.01	(0.999-1.01)	3.11	0.0778	0.999	1.01	1.01 (0.999-1.01)
BARD1	-0.13	0.882	(0.767-1.01)	3.11	0.078	0.767	1.01	0.882 (0.767-1.01)
RAB11B	0.0064	1.01	(0.999-1.01)	3.08	0.0792	0.999	1.01	1.01 (0.999-1.01)
CCNA2	-0.02	0.98	(0.958-1)	3.07	0.0796	0.958	1	0.98 (0.958-1)
CHRNA4	0.62	1.86	(0.928-3.72)	3.06	0.0805	0.928	3.72	1.86 (0.928-3.72)
HSF1	0.014	1.01	(0.998-1.03)	3.05	0.0808	0.998	1.03	1.01 (0.998-1.03)
XRCC3	0.13	1.14	(0.984-1.31)	3.04	0.0814	0.984	1.31	1.14 (0.984-1.31)
APBB1	0.13	1.14	(0.983-1.33)	3.03	0.0815	0.983	1.33	1.14 (0.983-1.33)
CDK3	0.72	2.06	(0.914-4.64)	3.03	0.0816	0.914	4.64	2.06 (0.914-4.64)
RAP2A	-0.03	0.97	(0.937-1)	3.03	0.0818	0.937	1	0.97 (0.937-1)
BCLAF1	-0.031	0.97	(0.937-1)	3.03	0.0819	0.937	1	0.97 (0.937-1)
SEM1	0.044	1.05	(0.994-1.1)	3.01	0.0825	0.994	1.1	1.05 (0.994-1.1)
RNF4	-0.078	0.925	(0.846-1.01)	3.01	0.0826	0.846	1.01	0.925 (0.846-1.01)
PTPN18	0.027	1.03	(0.996-1.06)	3.01	0.083	0.996	1.06	1.03 (0.996-1.06)
LYN	-0.032	0.968	(0.934-1)	2.97	0.0848	0.934	1	0.968 (0.934-1)
BEX3	0.0053	1.01	(0.999-1.01)	2.97	0.0848	0.999	1.01	1.01 (0.999-1.01)
WNT10A	0.049	1.05	(0.993-1.11)	2.97	0.085	0.993	1.11	1.05 (0.993-1.11)
CCNC	-0.031	0.969	(0.935-1)	2.96	0.0854	0.935	1	0.969 (0.935-1)
BRAT1	0.032	1.03	(0.995-1.07)	2.91	0.0881	0.995	1.07	1.03 (0.995-1.07)
TP53I11	0.018	1.02	(0.997-1.04)	2.91	0.0882	0.997	1.04	1.02 (0.997-1.04)
CRHBP	2	7.54	(0.736-77.3)	2.9	0.0888	0.736	77.3	7.54 (0.736-77.3)
NCOR1	-0.047	0.954	(0.904-1.01)	2.89	0.089	0.904	1.01	0.954 (0.904-1.01)
CASP3	-0.029	0.972	(0.94-1)	2.89	0.0891	0.94	1	0.972 (0.94-1)
UBA6	-0.062	0.94	(0.875-1.01)	2.89	0.0893	0.875	1.01	0.94 (0.875-1.01)
ZNF830	0.063	1.06	(0.99-1.14)	2.88	0.0897	0.99	1.14	1.06 (0.99-1.14)
NRCAM	0.087	1.09	(0.986-1.21)	2.87	0.09	0.986	1.21	1.09 (0.986-1.21)
MAPK9	-0.11	0.894	(0.785-1.02)	2.87	0.09	0.785	1.02	0.894 (0.785-1.02)
IFI16	0.019	1.02	(0.997-1.04)	2.86	0.0908	0.997	1.04	1.02 (0.997-1.04)
TMEM161A	0.019	1.02	(0.997-1.04)	2.86	0.0908	0.997	1.04	1.02 (0.997-1.04)
NUDT1	0.026	1.03	(0.996-1.06)	2.86	0.0909	0.996	1.06	1.03 (0.996-1.06)
CXCR6	-0.17	0.845	(0.696-1.03)	2.86	0.0909	0.696	1.03	0.845 (0.696-1.03)
PSMA5	-0.021	0.979	(0.955-1)	2.85	0.0913	0.955	1	0.979 (0.955-1)
LEF1	0.051	1.05	(0.992-1.12)	2.85	0.0913	0.992	1.12	1.05 (0.992-1.12)
PPP2CA	-0.026	0.975	(0.946-1)	2.85	0.0914	0.946	1	0.975 (0.946-1)
UBA7	0.026	1.03	(0.996-1.06)	2.84	0.0919	0.996	1.06	1.03 (0.996-1.06)
PLK5	0.26	1.29	(0.958-1.75)	2.83	0.0926	0.958	1.75	1.29 (0.958-1.75)
INTS3	0.073	1.08	(0.988-1.17)	2.79	0.0946	0.988	1.17	1.08 (0.988-1.17)
CXCL2	-0.01	0.99	(0.978-1)	2.78	0.0957	0.978	1	0.99 (0.978-1)
UBP1	-0.054	0.948	(0.89-1.01)	2.78	0.0957	0.89	1.01	0.948 (0.89-1.01)
CXCL8	-0.0023	0.998	(0.995-1)	2.76	0.0965	0.995	1	0.998 (0.995-1)
ACD	0.046	1.05	(0.992-1.1)	2.76	0.0967	0.992	1.1	1.05 (0.992-1.1)
BCCIP	0.037	1.04	(0.993-1.08)	2.75	0.097	0.993	1.08	1.04 (0.993-1.08)
PPP1R10	0.028	1.03	(0.995-1.06)	2.75	0.097	0.995	1.06	1.03 (0.995-1.06)
PDK1	-0.12	0.887	(0.769-1.02)	2.75	0.0971	0.769	1.02	0.887 (0.769-1.02)
NUP58	-0.04	0.961	(0.917-1.01)	2.74	0.0982	0.917	1.01	0.961 (0.917-1.01)
SCP2	-0.031	0.97	(0.935-1.01)	2.73	0.0982	0.935	1.01	0.97 (0.935-1.01)
SETD7	-0.061	0.941	(0.875-1.01)	2.72	0.0993	0.875	1.01	0.941 (0.875-1.01)
RPS27A	0.002	1	(1-1)	2.72	0.0993	1	1	1 (1-1)
LCK	0.016	1.02	(0.997-1.04)	2.71	0.0996	0.997	1.04	1.02 (0.997-1.04)
PTMS	0.0016	1	(1-1)	2.71	0.0998	1	1	1 (1-1)
ABL1	0.029	1.03	(0.995-1.06)	2.7	0.1	0.995	1.06	1.03 (0.995-1.06)
CNOT8	-0.031	0.969	(0.933-1.01)	2.69	0.101	0.933	1.01	0.969 (0.933-1.01)
DUSP5	0.012	1.01	(0.998-1.03)	2.69	0.101	0.998	1.03	1.01 (0.998-1.03)
GOLGA4	-0.032	0.969	(0.932-1.01)	2.68	0.102	0.932	1.01	0.969 (0.932-1.01)
FANCB	-0.24	0.784	(0.586-1.05)	2.67	0.102	0.586	1.05	0.784 (0.586-1.05)
CCNE2	-0.2	0.815	(0.637-1.04)	2.67	0.102	0.637	1.04	0.815 (0.637-1.04)
TCEA2	0.096	1.1	(0.981-1.24)	2.66	0.103	0.981	1.24	1.1 (0.981-1.24)
TFPT	0.028	1.03	(0.994-1.06)	2.64	0.104	0.994	1.06	1.03 (0.994-1.06)
ZMAT3	-0.07	0.933	(0.858-1.01)	2.63	0.105	0.858	1.01	0.933 (0.858-1.01)
TLE1	0.038	1.04	(0.992-1.09)	2.63	0.105	0.992	1.09	1.04 (0.992-1.09)
RAD52	0.12	1.12	(0.976-1.29)	2.62	0.106	0.976	1.29	1.12 (0.976-1.29)
SHLD2	-0.063	0.939	(0.87-1.01)	2.61	0.106	0.87	1.01	0.939 (0.87-1.01)
IKBKG	0.21	1.24	(0.955-1.61)	2.61	0.107	0.955	1.61	1.24 (0.955-1.61)
DMC1	-0.96	0.384	(0.12-1.23)	2.59	0.107	0.12	1.23	0.384 (0.12-1.23)
NSD2	-0.07	0.932	(0.856-1.02)	2.59	0.108	0.856	1.02	0.932 (0.856-1.02)
ATXN3	-0.38	0.683	(0.429-1.09)	2.59	0.108	0.429	1.09	0.683 (0.429-1.09)
ACER2	0.11	1.11	(0.977-1.27)	2.58	0.108	0.977	1.27	1.11 (0.977-1.27)
PML	0.038	1.04	(0.992-1.09)	2.57	0.109	0.992	1.09	1.04 (0.992-1.09)
TRIM39	0.2	1.22	(0.956-1.57)	2.57	0.109	0.956	1.57	1.22 (0.956-1.57)
TNFRSF10B	-0.021	0.979	(0.954-1)	2.56	0.109	0.954	1	0.979 (0.954-1)
RBM6	0.031	1.03	(0.993-1.07)	2.57	0.109	0.993	1.07	1.03 (0.993-1.07)
RNF138	-0.048	0.953	(0.899-1.01)	2.56	0.11	0.899	1.01	0.953 (0.899-1.01)
NUPR1	0.0077	1.01	(0.998-1.02)	2.55	0.11	0.998	1.02	1.01 (0.998-1.02)
SYK	0.015	1.02	(0.996-1.03)	2.54	0.111	0.996	1.03	1.02 (0.996-1.03)
PIK3C2G	1	2.72	(0.793-9.36)	2.53	0.111	0.793	9.36	2.72 (0.793-9.36)
PRPF19	0.0077	1.01	(0.998-1.02)	2.52	0.112	0.998	1.02	1.01 (0.998-1.02)
CDIP1	0.047	1.05	(0.989-1.11)	2.53	0.112	0.989	1.11	1.05 (0.989-1.11)
TP53	-0.01	0.99	(0.977-1)	2.53	0.112	0.977	1	0.99 (0.977-1)
MAPK15	0.039	1.04	(0.991-1.09)	2.52	0.113	0.991	1.09	1.04 (0.991-1.09)
APC	-0.12	0.888	(0.766-1.03)	2.52	0.113	0.766	1.03	0.888 (0.766-1.03)
CD69	-0.12	0.886	(0.761-1.03)	2.49	0.114	0.761	1.03	0.886 (0.761-1.03)
STAG1	-0.079	0.924	(0.838-1.02)	2.5	0.114	0.838	1.02	0.924 (0.838-1.02)
IFNGR1	-0.0094	0.991	(0.979-1)	2.49	0.114	0.979	1	0.991 (0.979-1)
CHTF18	0.035	1.04	(0.992-1.08)	2.49	0.114	0.992	1.08	1.04 (0.992-1.08)
BRD4	0.05	1.05	(0.988-1.12)	2.49	0.114	0.988	1.12	1.05 (0.988-1.12)
DDIT3	0.012	1.01	(0.997-1.03)	2.5	0.114	0.997	1.03	1.01 (0.997-1.03)
CBS	1.9	6.37	(0.637-63.8)	2.48	0.115	0.637	63.8	6.37 (0.637-63.8)
MCM3	0.0084	1.01	(0.998-1.02)	2.48	0.115	0.998	1.02	1.01 (0.998-1.02)
GGA3	0.063	1.06	(0.985-1.15)	2.47	0.116	0.985	1.15	1.06 (0.985-1.15)
RBBP4	-0.032	0.969	(0.931-1.01)	2.47	0.116	0.931	1.01	0.969 (0.931-1.01)
CLU	0.0091	1.01	(0.998-1.02)	2.47	0.116	0.998	1.02	1.01 (0.998-1.02)
CTLA4	-0.16	0.851	(0.696-1.04)	2.46	0.117	0.696	1.04	0.851 (0.696-1.04)
DCTD	0.021	1.02	(0.995-1.05)	2.46	0.117	0.995	1.05	1.02 (0.995-1.05)
STAT3	-0.023	0.978	(0.95-1.01)	2.46	0.117	0.95	1.01	0.978 (0.95-1.01)
CSF2RB	-0.061	0.941	(0.871-1.02)	2.44	0.118	0.871	1.02	0.941 (0.871-1.02)
PPOX	0.13	1.13	(0.968-1.33)	2.43	0.119	0.968	1.33	1.13 (0.968-1.33)
KPNA2	-0.0094	0.991	(0.979-1)	2.42	0.12	0.979	1	0.991 (0.979-1)
HIPK1	-0.04	0.961	(0.914-1.01)	2.4	0.121	0.914	1.01	0.961 (0.914-1.01)
CRYAB	0.032	1.03	(0.992-1.08)	2.41	0.121	0.992	1.08	1.03 (0.992-1.08)
PSMB7	0.0064	1.01	(0.998-1.01)	2.4	0.121	0.998	1.01	1.01 (0.998-1.01)
MLKL	0.084	1.09	(0.978-1.21)	2.41	0.121	0.978	1.21	1.09 (0.978-1.21)
TAF9	-0.023	0.977	(0.949-1.01)	2.4	0.121	0.949	1.01	0.977 (0.949-1.01)
NBN	-0.029	0.971	(0.936-1.01)	2.4	0.122	0.936	1.01	0.971 (0.936-1.01)
TMX1	-0.026	0.974	(0.942-1.01)	2.38	0.123	0.942	1.01	0.974 (0.942-1.01)
SNX8	0.033	1.03	(0.991-1.08)	2.37	0.124	0.991	1.08	1.03 (0.991-1.08)
GNL1	0.073	1.08	(0.98-1.18)	2.36	0.124	0.98	1.18	1.08 (0.98-1.18)
SIRT5	0.1	1.11	(0.971-1.27)	2.36	0.125	0.971	1.27	1.11 (0.971-1.27)
RDM1	0.25	1.29	(0.932-1.77)	2.35	0.126	0.932	1.77	1.29 (0.932-1.77)
LCP2	-0.057	0.945	(0.879-1.02)	2.34	0.126	0.879	1.02	0.945 (0.879-1.02)
ARID2	-0.084	0.92	(0.827-1.02)	2.35	0.126	0.827	1.02	0.92 (0.827-1.02)
PARP9	-0.035	0.966	(0.923-1.01)	2.33	0.127	0.923	1.01	0.966 (0.923-1.01)
TDP1	-0.13	0.877	(0.742-1.04)	2.33	0.127	0.742	1.04	0.877 (0.742-1.04)
AAAS	0.041	1.04	(0.988-1.1)	2.33	0.127	0.988	1.1	1.04 (0.988-1.1)
MAD2L1	-0.035	0.966	(0.924-1.01)	2.31	0.128	0.924	1.01	0.966 (0.924-1.01)
SPIDR	-0.073	0.93	(0.847-1.02)	2.32	0.128	0.847	1.02	0.93 (0.847-1.02)
MAP2K6	-0.078	0.925	(0.836-1.02)	2.3	0.129	0.836	1.02	0.925 (0.836-1.02)
SMC4	-0.045	0.956	(0.901-1.01)	2.31	0.129	0.901	1.01	0.956 (0.901-1.01)
GTF2F1	0.013	1.01	(0.996-1.03)	2.3	0.129	0.996	1.03	1.01 (0.996-1.03)
PCSK5	0.15	1.16	(0.958-1.4)	2.3	0.129	0.958	1.4	1.16 (0.958-1.4)
SMARCA5	-0.035	0.965	(0.922-1.01)	2.29	0.13	0.922	1.01	0.965 (0.922-1.01)
NDC1	-0.029	0.972	(0.936-1.01)	2.29	0.13	0.936	1.01	0.972 (0.936-1.01)
PTTG1	-0.014	0.986	(0.968-1)	2.3	0.13	0.968	1	0.986 (0.968-1)
DDX5	-0.01	0.99	(0.977-1)	2.28	0.131	0.977	1	0.99 (0.977-1)
MAPK1	-0.043	0.958	(0.906-1.01)	2.26	0.132	0.906	1.01	0.958 (0.906-1.01)
ERCC2	0.072	1.07	(0.978-1.18)	2.26	0.133	0.978	1.18	1.07 (0.978-1.18)
ARPC1B	0.0056	1.01	(0.998-1.01)	2.25	0.134	0.998	1.01	1.01 (0.998-1.01)
RGCC	0.0086	1.01	(0.997-1.02)	2.22	0.137	0.997	1.02	1.01 (0.997-1.02)
BAD	0.023	1.02	(0.993-1.05)	2.21	0.137	0.993	1.05	1.02 (0.993-1.05)
COPS4	-0.047	0.954	(0.896-1.02)	2.21	0.137	0.896	1.02	0.954 (0.896-1.02)
PPP2R1A	0.0086	1.01	(0.997-1.02)	2.2	0.138	0.997	1.02	1.01 (0.997-1.02)
EIF4E	-0.1	0.902	(0.787-1.03)	2.19	0.139	0.787	1.03	0.902 (0.787-1.03)
SKIL	-0.017	0.983	(0.961-1.01)	2.19	0.139	0.961	1.01	0.983 (0.961-1.01)
PDS5B	-0.069	0.933	(0.852-1.02)	2.19	0.139	0.852	1.02	0.933 (0.852-1.02)
KIFC1	0.018	1.02	(0.994-1.04)	2.19	0.139	0.994	1.04	1.02 (0.994-1.04)
PIK3C3	-0.18	0.839	(0.664-1.06)	2.18	0.14	0.664	1.06	0.839 (0.664-1.06)
CNOT2	-0.093	0.911	(0.804-1.03)	2.16	0.141	0.804	1.03	0.911 (0.804-1.03)
HEXB	-0.014	0.987	(0.969-1)	2.17	0.141	0.969	1	0.987 (0.969-1)
USP9X	-0.021	0.979	(0.952-1.01)	2.16	0.142	0.952	1.01	0.979 (0.952-1.01)
ARMT1	-0.039	0.962	(0.913-1.01)	2.15	0.142	0.913	1.01	0.962 (0.913-1.01)
VASP	-0.0084	0.992	(0.981-1)	2.13	0.144	0.981	1	0.992 (0.981-1)
CNOT6	-0.049	0.952	(0.891-1.02)	2.13	0.144	0.891	1.02	0.952 (0.891-1.02)
RHOA	-0.0028	0.997	(0.994-1)	2.13	0.144	0.994	1	0.997 (0.994-1)
PSME4	-0.048	0.953	(0.893-1.02)	2.13	0.145	0.893	1.02	0.953 (0.893-1.02)
PRELP	0.021	1.02	(0.993-1.05)	2.13	0.145	0.993	1.05	1.02 (0.993-1.05)
CBX5	-0.029	0.971	(0.934-1.01)	2.13	0.145	0.934	1.01	0.971 (0.934-1.01)
PSMD12	-0.033	0.968	(0.925-1.01)	2.13	0.145	0.925	1.01	0.968 (0.925-1.01)
RHOBTB3	-0.025	0.975	(0.943-1.01)	2.11	0.146	0.943	1.01	0.975 (0.943-1.01)
CDC5L	-0.046	0.955	(0.899-1.02)	2.11	0.146	0.899	1.02	0.955 (0.899-1.02)
PPP1R12C	0.046	1.05	(0.984-1.11)	2.11	0.146	0.984	1.11	1.05 (0.984-1.11)
BIK	0.005	1	(0.998-1.01)	2.11	0.146	0.998	1.01	1 (0.998-1.01)
BNIP3L	-0.016	0.984	(0.963-1.01)	2.11	0.146	0.963	1.01	0.984 (0.963-1.01)
CINP	0.077	1.08	(0.973-1.2)	2.1	0.147	0.973	1.2	1.08 (0.973-1.2)
SHLD3	-0.2	0.818	(0.624-1.07)	2.1	0.147	0.624	1.07	0.818 (0.624-1.07)
PSMA6	-0.097	0.908	(0.795-1.04)	2.08	0.149	0.795	1.04	0.908 (0.795-1.04)
FOXP1	-0.051	0.95	(0.886-1.02)	2.07	0.151	0.886	1.02	0.95 (0.886-1.02)
VDAC3	-0.009	0.991	(0.979-1)	2.04	0.153	0.979	1	0.991 (0.979-1)
CYB5A	-0.064	0.938	(0.86-1.02)	2.05	0.153	0.86	1.02	0.938 (0.86-1.02)
TWIST1	0.062	1.06	(0.977-1.16)	2.03	0.154	0.977	1.16	1.06 (0.977-1.16)
CHRNA7	0.35	1.41	(0.878-2.27)	2.03	0.154	0.878	2.27	1.41 (0.878-2.27)
BCL2A1	-0.023	0.977	(0.946-1.01)	2.03	0.155	0.946	1.01	0.977 (0.946-1.01)
PHC1	0.33	1.39	(0.881-2.2)	2.01	0.156	0.881	2.2	1.39 (0.881-2.2)
FUT4	-0.028	0.973	(0.936-1.01)	2.01	0.157	0.936	1.01	0.973 (0.936-1.01)
CDCA5	0.027	1.03	(0.989-1.07)	2	0.157	0.989	1.07	1.03 (0.989-1.07)
EIF2S1	-0.026	0.974	(0.94-1.01)	2.01	0.157	0.94	1.01	0.974 (0.94-1.01)
SLF1	-0.22	0.8	(0.588-1.09)	2	0.157	0.588	1.09	0.8 (0.588-1.09)
AEN	0.046	1.05	(0.982-1.11)	1.99	0.158	0.982	1.11	1.05 (0.982-1.11)
CHRNE	-1	0.361	(0.0881-1.48)	2	0.158	0.0881	1.48	0.361 (0.0881-1.48)
HMCES	0.023	1.02	(0.991-1.06)	1.98	0.159	0.991	1.06	1.02 (0.991-1.06)
RTEL1	-0.75	0.474	(0.168-1.34)	1.98	0.159	0.168	1.34	0.474 (0.168-1.34)
MYB	-0.021	0.979	(0.951-1.01)	1.98	0.159	0.951	1.01	0.979 (0.951-1.01)
SFRP2	0.0017	1	(0.999-1)	1.97	0.16	0.999	1	1 (0.999-1)
CETN2	0.013	1.01	(0.995-1.03)	1.98	0.16	0.995	1.03	1.01 (0.995-1.03)
CIB2	0.04	1.04	(0.984-1.1)	1.96	0.161	0.984	1.1	1.04 (0.984-1.1)
FMR1	-0.03	0.97	(0.93-1.01)	1.94	0.163	0.93	1.01	0.97 (0.93-1.01)
SP140	0.14	1.15	(0.946-1.39)	1.95	0.163	0.946	1.39	1.15 (0.946-1.39)
PPP2R3B	0.1	1.11	(0.958-1.29)	1.94	0.164	0.958	1.29	1.11 (0.958-1.29)
PSMB2	-0.017	0.983	(0.96-1.01)	1.93	0.164	0.96	1.01	0.983 (0.96-1.01)
SHPRH	-0.13	0.875	(0.725-1.06)	1.94	0.164	0.725	1.06	0.875 (0.725-1.06)
TGFB3	0.041	1.04	(0.984-1.1)	1.94	0.164	0.984	1.1	1.04 (0.984-1.1)
TAF9B	-0.028	0.972	(0.935-1.01)	1.92	0.165	0.935	1.01	0.972 (0.935-1.01)
BRCA2	-0.096	0.909	(0.793-1.04)	1.92	0.166	0.793	1.04	0.909 (0.793-1.04)
ITGB8	-0.085	0.918	(0.814-1.04)	1.92	0.166	0.814	1.04	0.918 (0.814-1.04)
MTOR	-0.07	0.932	(0.844-1.03)	1.92	0.166	0.844	1.03	0.932 (0.844-1.03)
DMAP1	0.073	1.08	(0.97-1.19)	1.91	0.167	0.97	1.19	1.08 (0.97-1.19)
RPS6KA3	-0.018	0.982	(0.957-1.01)	1.9	0.168	0.957	1.01	0.982 (0.957-1.01)
RABGGTB	-0.028	0.972	(0.935-1.01)	1.9	0.168	0.935	1.01	0.972 (0.935-1.01)
RAB9A	-0.035	0.965	(0.918-1.02)	1.89	0.169	0.918	1.02	0.965 (0.918-1.02)
MSH3	-0.077	0.926	(0.831-1.03)	1.9	0.169	0.831	1.03	0.926 (0.831-1.03)
EID3	-0.22	0.805	(0.591-1.1)	1.89	0.17	0.591	1.1	0.805 (0.591-1.1)
EMSY	-0.17	0.84	(0.656-1.08)	1.88	0.17	0.656	1.08	0.84 (0.656-1.08)
ITIH2	-0.85	0.426	(0.125-1.45)	1.88	0.171	0.125	1.45	0.426 (0.125-1.45)
SMC5	-0.037	0.964	(0.915-1.02)	1.88	0.171	0.915	1.02	0.964 (0.915-1.02)
TCF7L2	-0.026	0.974	(0.938-1.01)	1.87	0.171	0.938	1.01	0.974 (0.938-1.01)
HIPK2	-0.054	0.947	(0.877-1.02)	1.88	0.171	0.877	1.02	0.947 (0.877-1.02)
PPP2R5E	-0.058	0.944	(0.868-1.03)	1.86	0.172	0.868	1.03	0.944 (0.868-1.03)
FANCG	0.041	1.04	(0.982-1.11)	1.86	0.173	0.982	1.11	1.04 (0.982-1.11)
SPDYA	-0.21	0.81	(0.598-1.1)	1.86	0.173	0.598	1.1	0.81 (0.598-1.1)
MAPKAPK2	0.014	1.01	(0.994-1.03)	1.85	0.173	0.994	1.03	1.01 (0.994-1.03)
RECQL4	0.016	1.02	(0.993-1.04)	1.83	0.176	0.993	1.04	1.02 (0.993-1.04)
CGAS	0.068	1.07	(0.97-1.18)	1.83	0.176	0.97	1.18	1.07 (0.97-1.18)
EPHA2	0.0063	1.01	(0.997-1.02)	1.8	0.179	0.997	1.02	1.01 (0.997-1.02)
CFAP410	0.085	1.09	(0.961-1.23)	1.79	0.18	0.961	1.23	1.09 (0.961-1.23)
POLD4	0.036	1.04	(0.984-1.09)	1.79	0.181	0.984	1.09	1.04 (0.984-1.09)
HOXD9	0.019	1.02	(0.991-1.05)	1.78	0.182	0.991	1.05	1.02 (0.991-1.05)
TRIP12	-0.027	0.974	(0.936-1.01)	1.78	0.182	0.936	1.01	0.974 (0.936-1.01)
TFPI2	-0.11	0.897	(0.765-1.05)	1.77	0.183	0.765	1.05	0.897 (0.765-1.05)
NSMCE3	0.03	1.03	(0.986-1.08)	1.77	0.184	0.986	1.08	1.03 (0.986-1.08)
KIF22	0.021	1.02	(0.99-1.05)	1.76	0.184	0.99	1.05	1.02 (0.99-1.05)
RRM2	-0.012	0.988	(0.971-1.01)	1.76	0.185	0.971	1.01	0.988 (0.971-1.01)
LRBA	-0.032	0.969	(0.924-1.02)	1.76	0.185	0.924	1.02	0.969 (0.924-1.02)
HTATSF1	0.011	1.01	(0.995-1.03)	1.75	0.185	0.995	1.03	1.01 (0.995-1.03)
LIMS1	-0.031	0.969	(0.925-1.02)	1.75	0.186	0.925	1.02	0.969 (0.925-1.02)
NELFE	0.011	1.01	(0.995-1.03)	1.74	0.187	0.995	1.03	1.01 (0.995-1.03)
BABAM1	0.025	1.03	(0.988-1.06)	1.73	0.188	0.988	1.06	1.03 (0.988-1.06)
NEIL1	0.099	1.1	(0.953-1.28)	1.73	0.188	0.953	1.28	1.1 (0.953-1.28)
UBR2	-0.046	0.955	(0.892-1.02)	1.74	0.188	0.892	1.02	0.955 (0.892-1.02)
UBQLN4	0.023	1.02	(0.989-1.06)	1.73	0.188	0.989	1.06	1.02 (0.989-1.06)
TP53AIP1	-1.9	0.15	(0.00887-2.55)	1.72	0.189	0.00887	2.55	0.15 (0.00887-2.55)
POLD2	0.0061	1.01	(0.997-1.02)	1.72	0.19	0.997	1.02	1.01 (0.997-1.02)
MRNIP	0.13	1.14	(0.939-1.38)	1.72	0.19	0.939	1.38	1.14 (0.939-1.38)
ADH6	-0.068	0.934	(0.844-1.03)	1.72	0.19	0.844	1.03	0.934 (0.844-1.03)
HMGA1	0.0011	1	(0.999-1)	1.72	0.19	0.999	1	1 (0.999-1)
FRAT1	0.14	1.15	(0.934-1.41)	1.71	0.191	0.934	1.41	1.15 (0.934-1.41)
FEM1B	-0.038	0.963	(0.909-1.02)	1.71	0.191	0.909	1.02	0.963 (0.909-1.02)
FXR2	0.054	1.06	(0.973-1.14)	1.7	0.192	0.973	1.14	1.06 (0.973-1.14)
PIK3C2A	-0.03	0.97	(0.927-1.02)	1.7	0.192	0.927	1.02	0.97 (0.927-1.02)
GMNN	-0.022	0.978	(0.946-1.01)	1.71	0.192	0.946	1.01	0.978 (0.946-1.01)
COL17A1	0.0048	1	(0.998-1.01)	1.69	0.193	0.998	1.01	1 (0.998-1.01)
RPL7A	0.00036	1	(1-1)	1.7	0.193	1	1	1 (1-1)
JUN	0.0024	1	(0.999-1.01)	1.69	0.194	0.999	1.01	1 (0.999-1.01)
CCL4	-0.032	0.968	(0.923-1.02)	1.68	0.194	0.923	1.02	0.968 (0.923-1.02)
MNDA	-0.046	0.955	(0.892-1.02)	1.68	0.195	0.892	1.02	0.955 (0.892-1.02)
RIT2	-16	9.9e-08	(2.53e-18-3880)	1.68	0.195	2.53e-18	3880	9.9e-08 (2.53e-18-3880)
SMARCAL1	0.11	1.11	(0.947-1.3)	1.67	0.196	0.947	1.3	1.11 (0.947-1.3)
ARF1	0.0016	1	(0.999-1)	1.66	0.198	0.999	1	1 (0.999-1)
PPP4R2	-0.026	0.975	(0.937-1.01)	1.65	0.199	0.937	1.01	0.975 (0.937-1.01)
BACH1	-0.036	0.965	(0.913-1.02)	1.64	0.2	0.913	1.02	0.965 (0.913-1.02)
DDX39B	0.017	1.02	(0.991-1.04)	1.64	0.201	0.991	1.04	1.02 (0.991-1.04)
KRAS	-0.03	0.971	(0.927-1.02)	1.63	0.202	0.927	1.02	0.971 (0.927-1.02)
USP45	-0.097	0.908	(0.782-1.05)	1.62	0.203	0.782	1.05	0.908 (0.782-1.05)
RPS27L	-0.036	0.965	(0.913-1.02)	1.62	0.203	0.913	1.02	0.965 (0.913-1.02)
ATRX	-0.043	0.958	(0.896-1.02)	1.62	0.203	0.896	1.02	0.958 (0.896-1.02)
RBL1	-0.057	0.945	(0.866-1.03)	1.62	0.203	0.866	1.03	0.945 (0.866-1.03)
N4BP2	-0.11	0.894	(0.751-1.06)	1.62	0.204	0.751	1.06	0.894 (0.751-1.06)
XRCC4	0.063	1.07	(0.966-1.18)	1.61	0.204	0.966	1.18	1.07 (0.966-1.18)
PDS5A	-0.032	0.969	(0.923-1.02)	1.61	0.204	0.923	1.02	0.969 (0.923-1.02)
SPATA18	-0.11	0.9	(0.764-1.06)	1.61	0.205	0.764	1.06	0.9 (0.764-1.06)
DUT	0.016	1.02	(0.991-1.04)	1.6	0.205	0.991	1.04	1.02 (0.991-1.04)
PAK1	-0.026	0.974	(0.935-1.01)	1.6	0.206	0.935	1.01	0.974 (0.935-1.01)
SPATA22	-4.3	0.013	(1.54e-05-10.9)	1.6	0.206	1.54e-05	10.9	0.013 (1.54e-05-10.9)
ERBB2	0.0011	1	(0.999-1)	1.6	0.206	0.999	1	1 (0.999-1)
TFAP4	0.085	1.09	(0.954-1.24)	1.59	0.207	0.954	1.24	1.09 (0.954-1.24)
PRKACA	0.045	1.05	(0.975-1.12)	1.59	0.207	0.975	1.12	1.05 (0.975-1.12)
CHEK1	-0.063	0.939	(0.851-1.04)	1.59	0.208	0.851	1.04	0.939 (0.851-1.04)
RAB1B	0.0054	1.01	(0.997-1.01)	1.58	0.208	0.997	1.01	1.01 (0.997-1.01)
TIE1	0.045	1.05	(0.975-1.12)	1.58	0.208	0.975	1.12	1.05 (0.975-1.12)
ELOA2	-4	0.018	(3.35e-05-9.67)	1.57	0.21	3.35e-05	9.67	0.018 (3.35e-05-9.67)
GTF2H2C	-0.81	0.445	(0.126-1.58)	1.57	0.21	0.126	1.58	0.445 (0.126-1.58)
FAAP100	0.033	1.03	(0.982-1.09)	1.57	0.21	0.982	1.09	1.03 (0.982-1.09)
SUV39H1	0.036	1.04	(0.98-1.1)	1.56	0.211	0.98	1.1	1.04 (0.98-1.1)
CRADD	-0.22	0.802	(0.566-1.13)	1.56	0.212	0.566	1.13	0.802 (0.566-1.13)
AXIN2	-0.0056	0.994	(0.986-1)	1.56	0.212	0.986	1	0.994 (0.986-1)
IL10RB	0.017	1.02	(0.991-1.04)	1.56	0.212	0.991	1.04	1.02 (0.991-1.04)
SUMO1	0.0086	1.01	(0.995-1.02)	1.56	0.212	0.995	1.02	1.01 (0.995-1.02)
C1QTNF6	0.054	1.06	(0.97-1.15)	1.55	0.213	0.97	1.15	1.06 (0.97-1.15)
PSMA3	-0.012	0.988	(0.97-1.01)	1.55	0.213	0.97	1.01	0.988 (0.97-1.01)
RPS6KB1	-0.061	0.941	(0.855-1.04)	1.54	0.214	0.855	1.04	0.941 (0.855-1.04)
TRIM25	-0.028	0.972	(0.931-1.02)	1.55	0.214	0.931	1.02	0.972 (0.931-1.02)
VAV3	-0.013	0.987	(0.968-1.01)	1.55	0.214	0.968	1.01	0.987 (0.968-1.01)
CDKN2D	0.04	1.04	(0.977-1.11)	1.54	0.215	0.977	1.11	1.04 (0.977-1.11)
CDK12	0.036	1.04	(0.979-1.1)	1.53	0.216	0.979	1.1	1.04 (0.979-1.1)
CASP7	-0.017	0.983	(0.956-1.01)	1.53	0.216	0.956	1.01	0.983 (0.956-1.01)
POLA1	-0.047	0.954	(0.886-1.03)	1.53	0.216	0.886	1.03	0.954 (0.886-1.03)
SETD2	-0.039	0.961	(0.903-1.02)	1.53	0.216	0.903	1.02	0.961 (0.903-1.02)
INO80B	0.14	1.15	(0.919-1.45)	1.52	0.218	0.919	1.45	1.15 (0.919-1.45)
GML	-12	7.76e-06	(5.83e-14-1030)	1.52	0.218	5.83e-14	1030	7.76e-06 (5.83e-14-1030)
UBE2N	-0.019	0.981	(0.952-1.01)	1.51	0.219	0.952	1.01	0.981 (0.952-1.01)
SMARCAD1	-0.046	0.955	(0.888-1.03)	1.51	0.219	0.888	1.03	0.955 (0.888-1.03)
CCAR2	-0.025	0.976	(0.938-1.01)	1.51	0.219	0.938	1.01	0.976 (0.938-1.01)
REV3L	-0.063	0.939	(0.848-1.04)	1.51	0.219	0.848	1.04	0.939 (0.848-1.04)
E2F7	-0.14	0.867	(0.691-1.09)	1.51	0.22	0.691	1.09	0.867 (0.691-1.09)
CENPF	-0.031	0.97	(0.924-1.02)	1.5	0.221	0.924	1.02	0.97 (0.924-1.02)
MBD3	0.03	1.03	(0.982-1.08)	1.5	0.221	0.982	1.08	1.03 (0.982-1.08)
MRPS35	-0.0043	0.996	(0.989-1)	1.49	0.222	0.989	1	0.996 (0.989-1)
RAB6A	-0.013	0.987	(0.967-1.01)	1.49	0.222	0.967	1.01	0.987 (0.967-1.01)
SMCHD1	-0.037	0.964	(0.908-1.02)	1.49	0.222	0.908	1.02	0.964 (0.908-1.02)
CNTD1	0.12	1.12	(0.931-1.36)	1.48	0.223	0.931	1.36	1.12 (0.931-1.36)
CREB1	-0.051	0.95	(0.876-1.03)	1.48	0.224	0.876	1.03	0.95 (0.876-1.03)
DNTT	-4.4	0.0123	(1.03e-05-14.7)	1.48	0.224	1.03e-05	14.7	0.0123 (1.03e-05-14.7)
ING4	0.035	1.04	(0.979-1.1)	1.47	0.226	0.979	1.1	1.04 (0.979-1.1)
RB1	-0.019	0.982	(0.952-1.01)	1.46	0.226	0.952	1.01	0.982 (0.952-1.01)
NFIA	-0.035	0.965	(0.911-1.02)	1.46	0.227	0.911	1.02	0.965 (0.911-1.02)
CASP9	-0.15	0.86	(0.673-1.1)	1.45	0.228	0.673	1.1	0.86 (0.673-1.1)
NFKB1	-0.037	0.964	(0.907-1.02)	1.45	0.228	0.907	1.02	0.964 (0.907-1.02)
ZC3H12A	-0.011	0.989	(0.972-1.01)	1.45	0.228	0.972	1.01	0.989 (0.972-1.01)
NEIL3	-0.13	0.875	(0.703-1.09)	1.44	0.229	0.703	1.09	0.875 (0.703-1.09)
STK33	0.26	1.3	(0.849-1.98)	1.45	0.229	0.849	1.98	1.3 (0.849-1.98)
CD74	0.00028	1	(1-1)	1.44	0.231	1	1	1 (1-1)
CCND3	0.017	1.02	(0.989-1.05)	1.43	0.232	0.989	1.05	1.02 (0.989-1.05)
COG6	-0.049	0.952	(0.878-1.03)	1.43	0.232	0.878	1.03	0.952 (0.878-1.03)
AKT2	0.042	1.04	(0.973-1.12)	1.42	0.233	0.973	1.12	1.04 (0.973-1.12)
HELB	-0.16	0.855	(0.661-1.11)	1.42	0.233	0.661	1.11	0.855 (0.661-1.11)
RAE1	0.021	1.02	(0.987-1.06)	1.42	0.233	0.987	1.06	1.02 (0.987-1.06)
PHC3	-0.037	0.963	(0.906-1.02)	1.42	0.234	0.906	1.02	0.963 (0.906-1.02)
YY1	0.035	1.04	(0.978-1.1)	1.41	0.235	0.978	1.1	1.04 (0.978-1.1)
DDIT4	0.0033	1	(0.998-1.01)	1.41	0.235	0.998	1.01	1 (0.998-1.01)
HLA-DQB1	0.0043	1	(0.997-1.01)	1.4	0.236	0.997	1.01	1 (0.997-1.01)
CBL	-0.059	0.942	(0.854-1.04)	1.39	0.238	0.854	1.04	0.942 (0.854-1.04)
MRPS26	0.0035	1	(0.998-1.01)	1.38	0.239	0.998	1.01	1 (0.998-1.01)
CCDC13	-1.6	0.193	(0.0123-3.02)	1.37	0.241	0.0123	3.02	0.193 (0.0123-3.02)
PHF21A	0.099	1.1	(0.935-1.3)	1.37	0.242	0.935	1.3	1.1 (0.935-1.3)
PURA	-0.042	0.959	(0.893-1.03)	1.36	0.244	0.893	1.03	0.959 (0.893-1.03)
RPA4	-0.37	0.692	(0.373-1.29)	1.35	0.244	0.373	1.29	0.692 (0.373-1.29)
MCM10	0.083	1.09	(0.945-1.25)	1.36	0.244	0.945	1.25	1.09 (0.945-1.25)
GEN1	-0.096	0.908	(0.772-1.07)	1.35	0.245	0.772	1.07	0.908 (0.772-1.07)
RAB2A	-0.01	0.99	(0.972-1.01)	1.35	0.246	0.972	1.01	0.99 (0.972-1.01)
SIAH1	-0.1	0.903	(0.759-1.07)	1.34	0.246	0.759	1.07	0.903 (0.759-1.07)
PTPN11	-0.015	0.986	(0.962-1.01)	1.34	0.247	0.962	1.01	0.986 (0.962-1.01)
ARPC1A	0.0058	1.01	(0.996-1.02)	1.34	0.247	0.996	1.02	1.01 (0.996-1.02)
CBX2	0.042	1.04	(0.971-1.12)	1.33	0.248	0.971	1.12	1.04 (0.971-1.12)
UBB	0.00098	1	(0.999-1)	1.33	0.249	0.999	1	1 (0.999-1)
GGN	0.6	1.82	(0.656-5.07)	1.33	0.249	0.656	5.07	1.82 (0.656-5.07)
NUP88	-0.032	0.969	(0.918-1.02)	1.32	0.25	0.918	1.02	0.969 (0.918-1.02)
FGF10	-0.41	0.666	(0.333-1.33)	1.32	0.251	0.333	1.33	0.666 (0.333-1.33)
HUS1	-0.06	0.942	(0.851-1.04)	1.32	0.251	0.851	1.04	0.942 (0.851-1.04)
FZR1	0.026	1.03	(0.982-1.07)	1.32	0.251	0.982	1.07	1.03 (0.982-1.07)
SMYD2	0.033	1.03	(0.977-1.09)	1.31	0.252	0.977	1.09	1.03 (0.977-1.09)
PTEN	-0.027	0.974	(0.93-1.02)	1.31	0.252	0.93	1.02	0.974 (0.93-1.02)
SWSAP1	0.11	1.11	(0.927-1.33)	1.31	0.253	0.927	1.33	1.11 (0.927-1.33)
COPS6	0.0061	1.01	(0.996-1.02)	1.3	0.254	0.996	1.02	1.01 (0.996-1.02)
CTC1	0.096	1.1	(0.933-1.3)	1.29	0.255	0.933	1.3	1.1 (0.933-1.3)
SNW1	0.015	1.02	(0.989-1.04)	1.3	0.255	0.989	1.04	1.02 (0.989-1.04)
TOP1	-0.007	0.993	(0.981-1.01)	1.3	0.255	0.981	1.01	0.993 (0.981-1.01)
INSL4	-1.6	0.21	(0.0142-3.12)	1.28	0.257	0.0142	3.12	0.21 (0.0142-3.12)
XIAP	-0.02	0.98	(0.946-1.01)	1.28	0.258	0.946	1.01	0.98 (0.946-1.01)
RANBP2	-0.021	0.979	(0.944-1.02)	1.28	0.258	0.944	1.02	0.979 (0.944-1.02)
CNOT6L	-0.039	0.962	(0.9-1.03)	1.28	0.258	0.9	1.03	0.962 (0.9-1.03)
CCN2	0.0017	1	(0.999-1)	1.28	0.258	0.999	1	1 (0.999-1)
MCRS1	0.015	1.01	(0.989-1.04)	1.27	0.259	0.989	1.04	1.01 (0.989-1.04)
KIF14	-0.095	0.91	(0.772-1.07)	1.27	0.26	0.772	1.07	0.91 (0.772-1.07)
PPA1	-0.0047	0.995	(0.987-1)	1.27	0.26	0.987	1	0.995 (0.987-1)
MEIOB	-4	0.0184	(1.77e-05-19.2)	1.27	0.26	1.77e-05	19.2	0.0184 (1.77e-05-19.2)
MCM9	-0.21	0.815	(0.57-1.16)	1.27	0.26	0.57	1.16	0.815 (0.57-1.16)
RRM2B	-0.036	0.964	(0.905-1.03)	1.26	0.261	0.905	1.03	0.964 (0.905-1.03)
EVI2A	-0.035	0.965	(0.908-1.03)	1.27	0.261	0.908	1.03	0.965 (0.908-1.03)
ZMPSTE24	-0.014	0.986	(0.962-1.01)	1.26	0.262	0.962	1.01	0.986 (0.962-1.01)
PMS2	0.11	1.11	(0.923-1.34)	1.26	0.262	0.923	1.34	1.11 (0.923-1.34)
SETX	-0.029	0.972	(0.924-1.02)	1.26	0.262	0.924	1.02	0.972 (0.924-1.02)
AVPR1A	-0.22	0.803	(0.547-1.18)	1.25	0.263	0.547	1.18	0.803 (0.547-1.18)
CDKN1B	-0.009	0.991	(0.975-1.01)	1.25	0.264	0.975	1.01	0.991 (0.975-1.01)
PLK2	0.013	1.01	(0.99-1.04)	1.24	0.266	0.99	1.04	1.01 (0.99-1.04)
SET	0.004	1	(0.997-1.01)	1.24	0.266	0.997	1.01	1 (0.997-1.01)
ESCO2	-0.085	0.918	(0.789-1.07)	1.23	0.268	0.789	1.07	0.918 (0.789-1.07)
POLH	-0.078	0.925	(0.806-1.06)	1.23	0.268	0.806	1.06	0.925 (0.806-1.06)
ITGAL	0.047	1.05	(0.964-1.14)	1.22	0.269	0.964	1.14	1.05 (0.964-1.14)
USP7	-0.016	0.984	(0.956-1.01)	1.22	0.27	0.956	1.01	0.984 (0.956-1.01)
ANKRD39	0.11	1.11	(0.921-1.34)	1.21	0.27	0.921	1.34	1.11 (0.921-1.34)
TONSL	0.031	1.03	(0.976-1.09)	1.2	0.272	0.976	1.09	1.03 (0.976-1.09)
IL1R1	-0.025	0.976	(0.934-1.02)	1.21	0.272	0.934	1.02	0.976 (0.934-1.02)
PIK3CB	-0.04	0.961	(0.894-1.03)	1.21	0.272	0.894	1.03	0.961 (0.894-1.03)
PEA15	0.0061	1.01	(0.995-1.02)	1.21	0.272	0.995	1.02	1.01 (0.995-1.02)
BRIP1	-0.11	0.891	(0.726-1.1)	1.2	0.273	0.726	1.1	0.891 (0.726-1.1)
MGME1	0.017	1.02	(0.987-1.05)	1.2	0.273	0.987	1.05	1.02 (0.987-1.05)
POM121	0.055	1.06	(0.958-1.17)	1.2	0.274	0.958	1.17	1.06 (0.958-1.17)
EYA3	-0.054	0.947	(0.86-1.04)	1.2	0.274	0.86	1.04	0.947 (0.86-1.04)
POLQ	-0.097	0.908	(0.763-1.08)	1.19	0.275	0.763	1.08	0.908 (0.763-1.08)
INSR	0.025	1.03	(0.98-1.07)	1.19	0.275	0.98	1.07	1.03 (0.98-1.07)
ALKBH1	0.088	1.09	(0.933-1.28)	1.19	0.275	0.933	1.28	1.09 (0.933-1.28)
CASP8	-0.057	0.945	(0.853-1.05)	1.19	0.276	0.853	1.05	0.945 (0.853-1.05)
NDEL1	-0.064	0.938	(0.837-1.05)	1.19	0.276	0.837	1.05	0.938 (0.837-1.05)
EFNB1	0.0046	1	(0.996-1.01)	1.18	0.277	0.996	1.01	1 (0.996-1.01)
APLF	-0.18	0.837	(0.608-1.15)	1.18	0.277	0.608	1.15	0.837 (0.608-1.15)
NUP93	0.067	1.07	(0.948-1.21)	1.18	0.277	0.948	1.21	1.07 (0.948-1.21)
GADD45A	0.017	1.02	(0.986-1.05)	1.18	0.278	0.986	1.05	1.02 (0.986-1.05)
SLC30A5	-0.034	0.966	(0.908-1.03)	1.16	0.281	0.908	1.03	0.966 (0.908-1.03)
CCND2	-0.0036	0.996	(0.99-1)	1.15	0.283	0.99	1	0.996 (0.99-1)
PHF20	-0.037	0.963	(0.9-1.03)	1.15	0.284	0.9	1.03	0.963 (0.9-1.03)
FBXO4	-0.073	0.93	(0.814-1.06)	1.14	0.285	0.814	1.06	0.93 (0.814-1.06)
POLR2L	0.0014	1	(0.999-1)	1.14	0.286	0.999	1	1 (0.999-1)
ALKBH5	0.014	1.01	(0.988-1.04)	1.14	0.286	0.988	1.04	1.01 (0.988-1.04)
DCT	-0.67	0.512	(0.149-1.76)	1.13	0.287	0.149	1.76	0.512 (0.149-1.76)
ASCC2	0.024	1.02	(0.98-1.07)	1.13	0.287	0.98	1.07	1.02 (0.98-1.07)
POLN	-0.83	0.437	(0.095-2.01)	1.13	0.288	0.095	2.01	0.437 (0.095-2.01)
TAOK1	-0.025	0.975	(0.93-1.02)	1.13	0.288	0.93	1.02	0.975 (0.93-1.02)
SESN1	-0.011	0.989	(0.97-1.01)	1.13	0.288	0.97	1.01	0.989 (0.97-1.01)
LRRFIP2	-0.06	0.941	(0.842-1.05)	1.12	0.289	0.842	1.05	0.941 (0.842-1.05)
BCL2L1	0.0037	1	(0.997-1.01)	1.12	0.29	0.997	1.01	1 (0.997-1.01)
APPBP2	-0.065	0.937	(0.831-1.06)	1.11	0.291	0.831	1.06	0.937 (0.831-1.06)
ABRAXAS1	-0.16	0.852	(0.633-1.15)	1.12	0.291	0.633	1.15	0.852 (0.633-1.15)
SP3	-0.027	0.974	(0.926-1.02)	1.11	0.291	0.926	1.02	0.974 (0.926-1.02)
REPIN1	0.0049	1	(0.996-1.01)	1.12	0.291	0.996	1.01	1 (0.996-1.01)
SIRT4	0.32	1.37	(0.761-2.47)	1.11	0.292	0.761	2.47	1.37 (0.761-2.47)
EXD2	0.082	1.09	(0.932-1.26)	1.11	0.293	0.932	1.26	1.09 (0.932-1.26)
CYP39A1	-0.039	0.962	(0.895-1.03)	1.1	0.293	0.895	1.03	0.962 (0.895-1.03)
POM121C	0.057	1.06	(0.952-1.18)	1.1	0.293	0.952	1.18	1.06 (0.952-1.18)
FANCC	0.097	1.1	(0.919-1.32)	1.1	0.293	0.919	1.32	1.1 (0.919-1.32)
KIN	0.14	1.15	(0.888-1.48)	1.1	0.294	0.888	1.48	1.15 (0.888-1.48)
KLHL15	-0.084	0.919	(0.785-1.08)	1.1	0.294	0.785	1.08	0.919 (0.785-1.08)
ATR	-0.058	0.943	(0.846-1.05)	1.1	0.294	0.846	1.05	0.943 (0.846-1.05)
POT1	0.058	1.06	(0.95-1.18)	1.1	0.295	0.95	1.18	1.06 (0.95-1.18)
CENPS	-0.11	0.893	(0.723-1.1)	1.09	0.296	0.723	1.1	0.893 (0.723-1.1)
FH	-0.0065	0.994	(0.982-1.01)	1.09	0.297	0.982	1.01	0.994 (0.982-1.01)
SOS1	-0.032	0.969	(0.912-1.03)	1.09	0.297	0.912	1.03	0.969 (0.912-1.03)
SMG1	-0.028	0.973	(0.923-1.02)	1.09	0.297	0.923	1.02	0.973 (0.923-1.02)
PIAS1	-0.066	0.937	(0.828-1.06)	1.09	0.297	0.828	1.06	0.937 (0.828-1.06)
TP73	0.1	1.11	(0.912-1.35)	1.08	0.298	0.912	1.35	1.11 (0.912-1.35)
RPS27AP11	-0.086	0.917	(0.779-1.08)	1.08	0.299	0.779	1.08	0.917 (0.779-1.08)
CIR1	0.021	1.02	(0.982-1.06)	1.08	0.299	0.982	1.06	1.02 (0.982-1.06)
RAC2	0.009	1.01	(0.992-1.03)	1.07	0.3	0.992	1.03	1.01 (0.992-1.03)
PSMD14	-0.028	0.972	(0.922-1.03)	1.07	0.3	0.922	1.03	0.972 (0.922-1.03)
NPM1	-0.0013	0.999	(0.996-1)	1.07	0.301	0.996	1	0.999 (0.996-1)
SUPT4H1	0.0047	1	(0.996-1.01)	1.07	0.301	0.996	1.01	1 (0.996-1.01)
MCL1	-0.003	0.997	(0.991-1)	1.07	0.302	0.991	1	0.997 (0.991-1)
INO80D	-0.034	0.967	(0.907-1.03)	1.06	0.303	0.907	1.03	0.967 (0.907-1.03)
CENPX	-0.0044	0.996	(0.987-1)	1.06	0.303	0.987	1	0.996 (0.987-1)
NUP50	-0.033	0.967	(0.908-1.03)	1.06	0.303	0.908	1.03	0.967 (0.908-1.03)
POLE3	0.0072	1.01	(0.993-1.02)	1.06	0.304	0.993	1.02	1.01 (0.993-1.02)
STXBP4	-0.24	0.79	(0.503-1.24)	1.05	0.305	0.503	1.24	0.79 (0.503-1.24)
STK11	0.024	1.02	(0.978-1.07)	1.05	0.305	0.978	1.07	1.02 (0.978-1.07)
NDUFB6	-0.0087	0.991	(0.975-1.01)	1.04	0.307	0.975	1.01	0.991 (0.975-1.01)
POLD1	0.019	1.02	(0.983-1.06)	1.04	0.308	0.983	1.06	1.02 (0.983-1.06)
PIK3CG	-0.16	0.852	(0.625-1.16)	1.03	0.309	0.625	1.16	0.852 (0.625-1.16)
SGK1	-0.033	0.968	(0.908-1.03)	1.03	0.31	0.908	1.03	0.968 (0.908-1.03)
DNALI1	-0.085	0.919	(0.78-1.08)	1.03	0.311	0.78	1.08	0.919 (0.78-1.08)
MRPS9	0.016	1.02	(0.985-1.05)	1.03	0.311	0.985	1.05	1.02 (0.985-1.05)
PRKAB1	0.016	1.02	(0.985-1.05)	1.03	0.311	0.985	1.05	1.02 (0.985-1.05)
EPS8L1	0.023	1.02	(0.979-1.07)	1.03	0.311	0.979	1.07	1.02 (0.979-1.07)
YWHAG	0.0059	1.01	(0.994-1.02)	1.03	0.311	0.994	1.02	1.01 (0.994-1.02)
DTX3L	-0.014	0.986	(0.961-1.01)	1.02	0.313	0.961	1.01	0.986 (0.961-1.01)
PSMC5	0.012	1.01	(0.989-1.03)	1.02	0.313	0.989	1.03	1.01 (0.989-1.03)
DYRK3	-0.19	0.828	(0.574-1.2)	1.01	0.314	0.574	1.2	0.828 (0.574-1.2)
ATP7A	-0.075	0.927	(0.801-1.07)	1.01	0.315	0.801	1.07	0.927 (0.801-1.07)
FGF2	0.081	1.08	(0.926-1.27)	1.01	0.315	0.926	1.27	1.08 (0.926-1.27)
TRIP13	0.028	1.03	(0.973-1.09)	1.01	0.315	0.973	1.09	1.03 (0.973-1.09)
UFD1	-0.052	0.949	(0.857-1.05)	1.01	0.315	0.857	1.05	0.949 (0.857-1.05)
EREG	-0.0072	0.993	(0.979-1.01)	1.01	0.315	0.979	1.01	0.993 (0.979-1.01)
RFWD3	0.031	1.03	(0.971-1.1)	1.01	0.315	0.971	1.1	1.03 (0.971-1.1)
RNF169	-0.054	0.947	(0.852-1.05)	1.01	0.315	0.852	1.05	0.947 (0.852-1.05)
CCNE1	0.023	1.02	(0.978-1.07)	1	0.317	0.978	1.07	1.02 (0.978-1.07)
PSMD1	-0.014	0.986	(0.96-1.01)	1	0.318	0.96	1.01	0.986 (0.96-1.01)
FAN1	0.076	1.08	(0.929-1.25)	0.99	0.319	0.929	1.25	1.08 (0.929-1.25)
MET	0.0059	1.01	(0.994-1.02)	0.99	0.319	0.994	1.02	1.01 (0.994-1.02)
PIK3R2	0.61	1.85	(0.551-6.19)	0.99	0.32	0.551	6.19	1.85 (0.551-6.19)
PARP4	-0.0056	0.994	(0.983-1.01)	0.99	0.321	0.983	1.01	0.994 (0.983-1.01)
TLK2	-0.082	0.921	(0.783-1.08)	0.98	0.322	0.783	1.08	0.921 (0.783-1.08)
RUFY3	-0.046	0.955	(0.872-1.05)	0.98	0.323	0.872	1.05	0.955 (0.872-1.05)
MPLKIP	0.042	1.04	(0.959-1.13)	0.97	0.324	0.959	1.13	1.04 (0.959-1.13)
RPA2	0.011	1.01	(0.989-1.03)	0.97	0.324	0.989	1.03	1.01 (0.989-1.03)
CCL3	-0.023	0.977	(0.932-1.02)	0.97	0.324	0.932	1.02	0.977 (0.932-1.02)
PTPRK	-0.019	0.981	(0.944-1.02)	0.97	0.325	0.944	1.02	0.981 (0.944-1.02)
CUL5	-0.033	0.968	(0.907-1.03)	0.96	0.326	0.907	1.03	0.968 (0.907-1.03)
HLA-DQA1	0.0058	1.01	(0.994-1.02)	0.96	0.326	0.994	1.02	1.01 (0.994-1.02)
AUNIP	-0.087	0.917	(0.771-1.09)	0.97	0.326	0.771	1.09	0.917 (0.771-1.09)
NELFA	0.031	1.03	(0.969-1.1)	0.96	0.327	0.969	1.1	1.03 (0.969-1.1)
XRCC2	0.073	1.08	(0.93-1.24)	0.96	0.328	0.93	1.24	1.08 (0.93-1.24)
ORC6	0.047	1.05	(0.954-1.15)	0.96	0.328	0.954	1.15	1.05 (0.954-1.15)
TNFRSF1A	0.0099	1.01	(0.99-1.03)	0.95	0.329	0.99	1.03	1.01 (0.99-1.03)
CSNK1D	0.024	1.02	(0.976-1.08)	0.95	0.33	0.976	1.08	1.02 (0.976-1.08)
ITGB5	0.011	1.01	(0.989-1.03)	0.94	0.331	0.989	1.03	1.01 (0.989-1.03)
PDE3A	-0.033	0.967	(0.905-1.03)	0.94	0.333	0.905	1.03	0.967 (0.905-1.03)
CNOT10	-0.053	0.948	(0.852-1.06)	0.94	0.333	0.852	1.06	0.948 (0.852-1.06)
SMAD3	0.034	1.03	(0.966-1.11)	0.93	0.334	0.966	1.11	1.03 (0.966-1.11)
DVL1	0.007	1.01	(0.993-1.02)	0.93	0.334	0.993	1.02	1.01 (0.993-1.02)
SOX7	0.095	1.1	(0.907-1.33)	0.93	0.335	0.907	1.33	1.1 (0.907-1.33)
ERCC5	0.044	1.05	(0.954-1.15)	0.91	0.339	0.954	1.15	1.05 (0.954-1.15)
SIRT7	0.039	1.04	(0.96-1.13)	0.91	0.339	0.96	1.13	1.04 (0.96-1.13)
FBLN1	0.0065	1.01	(0.993-1.02)	0.91	0.339	0.993	1.02	1.01 (0.993-1.02)
NUP107	0.039	1.04	(0.96-1.13)	0.91	0.339	0.96	1.13	1.04 (0.96-1.13)
TINF2	0.022	1.02	(0.977-1.07)	0.91	0.341	0.977	1.07	1.02 (0.977-1.07)
ZBTB38	-0.017	0.983	(0.95-1.02)	0.9	0.342	0.95	1.02	0.983 (0.95-1.02)
PPP2R5C	-0.026	0.974	(0.922-1.03)	0.9	0.342	0.922	1.03	0.974 (0.922-1.03)
SLFN11	0.038	1.04	(0.96-1.12)	0.9	0.343	0.96	1.12	1.04 (0.96-1.12)
CD44	-0.0059	0.994	(0.982-1.01)	0.89	0.345	0.982	1.01	0.994 (0.982-1.01)
ZBTB4	0.022	1.02	(0.977-1.07)	0.89	0.346	0.977	1.07	1.02 (0.977-1.07)
ACTR2	-0.0036	0.996	(0.989-1)	0.88	0.347	0.989	1	0.996 (0.989-1)
SLC1A3	-0.072	0.93	(0.8-1.08)	0.88	0.348	0.8	1.08	0.93 (0.8-1.08)
CBX1	0.014	1.01	(0.985-1.04)	0.88	0.349	0.985	1.04	1.01 (0.985-1.04)
NEDD4	-0.06	0.942	(0.83-1.07)	0.88	0.349	0.83	1.07	0.942 (0.83-1.07)
SPRED1	-0.022	0.978	(0.933-1.02)	0.88	0.349	0.933	1.02	0.978 (0.933-1.02)
PCYT2	0.023	1.02	(0.975-1.07)	0.87	0.35	0.975	1.07	1.02 (0.975-1.07)
DIS3	-0.031	0.969	(0.907-1.04)	0.85	0.355	0.907	1.04	0.969 (0.907-1.04)
DNAJA1	0.0036	1	(0.996-1.01)	0.86	0.355	0.996	1.01	1 (0.996-1.01)
MOAP1	0.03	1.03	(0.967-1.1)	0.85	0.356	0.967	1.1	1.03 (0.967-1.1)
PSMC1	-0.1	0.903	(0.728-1.12)	0.85	0.357	0.728	1.12	0.903 (0.728-1.12)
MPP3	0.12	1.12	(0.877-1.44)	0.84	0.359	0.877	1.44	1.12 (0.877-1.44)
RAD21L1	-1.9	0.154	(0.00281-8.4)	0.84	0.359	0.00281	8.4	0.154 (0.00281-8.4)
SHC1	0.012	1.01	(0.987-1.04)	0.84	0.36	0.987	1.04	1.01 (0.987-1.04)
BDH2	0.033	1.03	(0.963-1.11)	0.84	0.36	0.963	1.11	1.03 (0.963-1.11)
NIPBL	-0.025	0.975	(0.924-1.03)	0.84	0.36	0.924	1.03	0.975 (0.924-1.03)
SPRED2	-0.028	0.972	(0.915-1.03)	0.83	0.361	0.915	1.03	0.972 (0.915-1.03)
VIM	0.0018	1	(0.998-1.01)	0.84	0.361	0.998	1.01	1 (0.998-1.01)
PSG1	-4.2	0.0149	(1.78e-06-125)	0.83	0.361	1.78e-06	125	0.0149 (1.78e-06-125)
CYBRD1	0.0094	1.01	(0.989-1.03)	0.83	0.363	0.989	1.03	1.01 (0.989-1.03)
SGCB	-0.022	0.978	(0.932-1.03)	0.83	0.364	0.932	1.03	0.978 (0.932-1.03)
MECOM	-0.023	0.977	(0.931-1.03)	0.82	0.364	0.931	1.03	0.977 (0.931-1.03)
DOCK2	-0.086	0.918	(0.762-1.1)	0.82	0.365	0.762	1.1	0.918 (0.762-1.1)
CDC14C	-6.5	0.00148	(1.12e-09-1940)	0.82	0.365	1.12e-09	1940	0.00148 (1.12e-09-1940)
MEIOC	-0.97	0.378	(0.0459-3.11)	0.82	0.366	0.0459	3.11	0.378 (0.0459-3.11)
PARP2	0.055	1.06	(0.937-1.19)	0.81	0.367	0.937	1.19	1.06 (0.937-1.19)
WNT2	-0.036	0.964	(0.891-1.04)	0.81	0.368	0.891	1.04	0.964 (0.891-1.04)
PSMD2	0.0071	1.01	(0.992-1.02)	0.81	0.368	0.992	1.02	1.01 (0.992-1.02)
PRLR	-0.048	0.953	(0.857-1.06)	0.81	0.369	0.857	1.06	0.953 (0.857-1.06)
SETMAR	-0.065	0.937	(0.814-1.08)	0.81	0.369	0.814	1.08	0.937 (0.814-1.08)
ERCC1	0.041	1.04	(0.953-1.14)	0.81	0.369	0.953	1.14	1.04 (0.953-1.14)
ATF2	-0.03	0.971	(0.91-1.04)	0.8	0.37	0.91	1.04	0.971 (0.91-1.04)
APBA3	0.045	1.05	(0.948-1.15)	0.8	0.37	0.948	1.15	1.05 (0.948-1.15)
RFC5	-0.03	0.971	(0.91-1.04)	0.8	0.371	0.91	1.04	0.971 (0.91-1.04)
PIK3R4	0.045	1.05	(0.948-1.15)	0.8	0.371	0.948	1.15	1.05 (0.948-1.15)
CCNT1	-0.029	0.972	(0.912-1.03)	0.8	0.372	0.912	1.03	0.972 (0.912-1.03)
HELZ	-0.029	0.971	(0.912-1.04)	0.8	0.372	0.912	1.04	0.971 (0.912-1.04)
FEN1	0.0093	1.01	(0.989-1.03)	0.79	0.373	0.989	1.03	1.01 (0.989-1.03)
PTTG2	-0.89	0.41	(0.0576-2.92)	0.79	0.373	0.0576	2.92	0.41 (0.0576-2.92)
FOXO3	-0.018	0.982	(0.944-1.02)	0.79	0.375	0.944	1.02	0.982 (0.944-1.02)
ROPN1L	-0.69	0.503	(0.11-2.31)	0.78	0.376	0.11	2.31	0.503 (0.11-2.31)
CDC34	0.0052	1.01	(0.994-1.02)	0.78	0.377	0.994	1.02	1.01 (0.994-1.02)
CYREN	0.085	1.09	(0.9-1.32)	0.77	0.379	0.9	1.32	1.09 (0.9-1.32)
IGFBP1	0.06	1.06	(0.929-1.22)	0.77	0.379	0.929	1.22	1.06 (0.929-1.22)
HIBADH	-0.0079	0.992	(0.975-1.01)	0.77	0.38	0.975	1.01	0.992 (0.975-1.01)
CARM1	0.011	1.01	(0.987-1.03)	0.77	0.38	0.987	1.03	1.01 (0.987-1.03)
UBA1	0.003	1	(0.996-1.01)	0.77	0.381	0.996	1.01	1 (0.996-1.01)
RIF1	-0.026	0.974	(0.918-1.03)	0.77	0.381	0.918	1.03	0.974 (0.918-1.03)
CRY1	-0.061	0.941	(0.822-1.08)	0.77	0.381	0.822	1.08	0.941 (0.822-1.08)
CETN1	-9.1	0.000114	(1.62e-13-79500)	0.76	0.382	1.62e-13	79500	0.000114 (1.62e-13-79500)
POLK	-0.07	0.933	(0.798-1.09)	0.76	0.382	0.798	1.09	0.933 (0.798-1.09)
PSMA7	-0.00088	0.999	(0.997-1)	0.75	0.385	0.997	1	0.999 (0.997-1)
EML4	-0.015	0.985	(0.952-1.02)	0.75	0.387	0.952	1.02	0.985 (0.952-1.02)
TOP2B	-0.01	0.99	(0.968-1.01)	0.75	0.387	0.968	1.01	0.99 (0.968-1.01)
POLR2E	0.0079	1.01	(0.99-1.03)	0.75	0.388	0.99	1.03	1.01 (0.99-1.03)
MACROD1	0.0052	1.01	(0.993-1.02)	0.74	0.388	0.993	1.02	1.01 (0.993-1.02)
RAD51	0.03	1.03	(0.963-1.1)	0.74	0.389	0.963	1.1	1.03 (0.963-1.1)
OPRK1	-2.2	0.107	(0.000664-17.3)	0.74	0.389	0.000664	17.3	0.107 (0.000664-17.3)
RPL26	0.0011	1	(0.999-1)	0.74	0.389	0.999	1	1 (0.999-1)
FMO4	0.092	1.1	(0.888-1.35)	0.74	0.391	0.888	1.35	1.1 (0.888-1.35)
PPP2R1B	-0.032	0.968	(0.9-1.04)	0.73	0.392	0.9	1.04	0.968 (0.9-1.04)
TICRR	0.073	1.08	(0.91-1.27)	0.73	0.392	0.91	1.27	1.08 (0.91-1.27)
ADSL	-0.017	0.983	(0.944-1.02)	0.73	0.393	0.944	1.02	0.983 (0.944-1.02)
PPM1D	-0.077	0.926	(0.776-1.1)	0.73	0.393	0.776	1.1	0.926 (0.776-1.1)
USP10	0.018	1.02	(0.977-1.06)	0.73	0.393	0.977	1.06	1.02 (0.977-1.06)
FBXO31	0.031	1.03	(0.96-1.11)	0.72	0.396	0.96	1.11	1.03 (0.96-1.11)
EME2	0.06	1.06	(0.924-1.22)	0.72	0.397	0.924	1.22	1.06 (0.924-1.22)
GINS4	-0.079	0.924	(0.768-1.11)	0.71	0.398	0.768	1.11	0.924 (0.768-1.11)
FADS1	0.032	1.03	(0.959-1.11)	0.72	0.398	0.959	1.11	1.03 (0.959-1.11)
ERCC8	-0.1	0.904	(0.716-1.14)	0.71	0.399	0.716	1.14	0.904 (0.716-1.14)
POLG2	0.054	1.06	(0.931-1.2)	0.71	0.399	0.931	1.2	1.06 (0.931-1.2)
REV1	-0.053	0.949	(0.839-1.07)	0.71	0.399	0.839	1.07	0.949 (0.839-1.07)
DYRK2	-0.021	0.98	(0.934-1.03)	0.71	0.399	0.934	1.03	0.98 (0.934-1.03)
CLSPN	-0.076	0.927	(0.777-1.11)	0.71	0.4	0.777	1.11	0.927 (0.777-1.11)
CETN3	0.04	1.04	(0.948-1.14)	0.7	0.402	0.948	1.14	1.04 (0.948-1.14)
AXIN1	0.016	1.02	(0.979-1.05)	0.7	0.403	0.979	1.05	1.02 (0.979-1.05)
POLE4	0.012	1.01	(0.984-1.04)	0.7	0.403	0.984	1.04	1.01 (0.984-1.04)
MGMT	-0.015	0.985	(0.951-1.02)	0.7	0.403	0.951	1.02	0.985 (0.951-1.02)
TRIM28	0.0017	1	(0.998-1.01)	0.7	0.403	0.998	1.01	1 (0.998-1.01)
PRRX1	-0.02	0.98	(0.935-1.03)	0.7	0.404	0.935	1.03	0.98 (0.935-1.03)
UCHL5	-0.028	0.972	(0.91-1.04)	0.7	0.404	0.91	1.04	0.972 (0.91-1.04)
FIGNL1	-0.036	0.964	(0.885-1.05)	0.69	0.406	0.885	1.05	0.964 (0.885-1.05)
YAP1	-0.0086	0.991	(0.972-1.01)	0.69	0.406	0.972	1.01	0.991 (0.972-1.01)
SNAI2	-0.027	0.974	(0.914-1.04)	0.69	0.407	0.914	1.04	0.974 (0.914-1.04)
NUDT15	-0.0089	0.991	(0.97-1.01)	0.68	0.408	0.97	1.01	0.991 (0.97-1.01)
NET1	0.0051	1.01	(0.993-1.02)	0.68	0.41	0.993	1.02	1.01 (0.993-1.02)
FANCF	0.029	1.03	(0.961-1.1)	0.68	0.411	0.961	1.1	1.03 (0.961-1.1)
CHL1	-0.19	0.828	(0.528-1.3)	0.67	0.412	0.528	1.3	0.828 (0.528-1.3)
MCM2	0.0082	1.01	(0.989-1.03)	0.67	0.412	0.989	1.03	1.01 (0.989-1.03)
SEC13	-0.0095	0.991	(0.968-1.01)	0.67	0.412	0.968	1.01	0.991 (0.968-1.01)
GDF11	0.083	1.09	(0.891-1.33)	0.67	0.413	0.891	1.33	1.09 (0.891-1.33)
GSK3B	-0.023	0.978	(0.926-1.03)	0.67	0.413	0.926	1.03	0.978 (0.926-1.03)
ENDOU	-0.95	0.388	(0.0399-3.76)	0.67	0.414	0.0399	3.76	0.388 (0.0399-3.76)
MSH4	-0.26	0.772	(0.414-1.44)	0.66	0.415	0.414	1.44	0.772 (0.414-1.44)
TFAM	-0.017	0.983	(0.943-1.02)	0.67	0.415	0.943	1.02	0.983 (0.943-1.02)
DNA2	-0.051	0.95	(0.84-1.08)	0.66	0.418	0.84	1.08	0.95 (0.84-1.08)
DEK	-0.0038	0.996	(0.987-1.01)	0.65	0.418	0.987	1.01	0.996 (0.987-1.01)
LINS1	-0.11	0.892	(0.676-1.18)	0.65	0.419	0.676	1.18	0.892 (0.676-1.18)
PIF1	0.082	1.09	(0.889-1.33)	0.65	0.42	0.889	1.33	1.09 (0.889-1.33)
SEH1L	-0.042	0.959	(0.865-1.06)	0.65	0.42	0.865	1.06	0.959 (0.865-1.06)
CTDP1	-0.046	0.955	(0.854-1.07)	0.65	0.42	0.854	1.07	0.955 (0.854-1.07)
XRCC1	0.02	1.02	(0.972-1.07)	0.65	0.421	0.972	1.07	1.02 (0.972-1.07)
SSRP1	0.0068	1.01	(0.99-1.02)	0.64	0.422	0.99	1.02	1.01 (0.99-1.02)
AP5S1	0.062	1.06	(0.914-1.24)	0.64	0.423	0.914	1.24	1.06 (0.914-1.24)
PRDM9	-5.5	0.00402	(5.58e-09-2900)	0.64	0.423	5.58e-09	2900	0.00402 (5.58e-09-2900)
PHLDA3	0.01	1.01	(0.985-1.04)	0.64	0.423	0.985	1.04	1.01 (0.985-1.04)
TOP3B	-1.3	0.285	(0.0132-6.15)	0.64	0.423	0.0132	6.15	0.285 (0.0132-6.15)
UVSSA	-0.086	0.917	(0.742-1.13)	0.64	0.424	0.742	1.13	0.917 (0.742-1.13)
POLI	-0.097	0.907	(0.714-1.15)	0.64	0.424	0.714	1.15	0.907 (0.714-1.15)
MAEL	-0.088	0.916	(0.738-1.14)	0.64	0.425	0.738	1.14	0.916 (0.738-1.14)
PMS2P2	0.75	2.11	(0.335-13.2)	0.63	0.427	0.335	13.2	2.11 (0.335-13.2)
GPD2	-0.023	0.977	(0.923-1.03)	0.63	0.427	0.923	1.03	0.977 (0.923-1.03)
GTF2H4	0.17	1.18	(0.784-1.78)	0.63	0.427	0.784	1.78	1.18 (0.784-1.78)
MACROD2	0.12	1.13	(0.839-1.51)	0.63	0.428	0.839	1.51	1.13 (0.839-1.51)
EIF2AK4	0.057	1.06	(0.92-1.22)	0.63	0.428	0.92	1.22	1.06 (0.92-1.22)
PSMB3	0.0011	1	(0.998-1)	0.63	0.428	0.998	1	1 (0.998-1)
MYD88	-0.013	0.987	(0.956-1.02)	0.63	0.428	0.956	1.02	0.987 (0.956-1.02)
BCL2L12	0.014	1.01	(0.979-1.05)	0.63	0.428	0.979	1.05	1.01 (0.979-1.05)
EXO5	-0.11	0.899	(0.692-1.17)	0.63	0.428	0.692	1.17	0.899 (0.692-1.17)
TXNRD2	0.057	1.06	(0.918-1.22)	0.61	0.434	0.918	1.22	1.06 (0.918-1.22)
NELFCD	0.0059	1.01	(0.991-1.02)	0.61	0.435	0.991	1.02	1.01 (0.991-1.02)
CREBBP	0.029	1.03	(0.958-1.11)	0.61	0.435	0.958	1.11	1.03 (0.958-1.11)
ELOA	-0.031	0.97	(0.898-1.05)	0.61	0.436	0.898	1.05	0.97 (0.898-1.05)
WNT4	-0.048	0.953	(0.844-1.08)	0.61	0.436	0.844	1.08	0.953 (0.844-1.08)
SOS2	-0.029	0.972	(0.904-1.04)	0.61	0.436	0.904	1.04	0.972 (0.904-1.04)
PWWP3A	0.055	1.06	(0.92-1.21)	0.61	0.436	0.92	1.21	1.06 (0.92-1.21)
NABP1	-0.029	0.972	(0.904-1.04)	0.6	0.438	0.904	1.04	0.972 (0.904-1.04)
LOX	-0.013	0.987	(0.955-1.02)	0.6	0.438	0.955	1.02	0.987 (0.955-1.02)
UBE2B	-0.011	0.99	(0.964-1.02)	0.6	0.439	0.964	1.02	0.99 (0.964-1.02)
NUCKS1	-0.0043	0.996	(0.985-1.01)	0.6	0.439	0.985	1.01	0.996 (0.985-1.01)
WEE1	-0.028	0.973	(0.907-1.04)	0.6	0.439	0.907	1.04	0.973 (0.907-1.04)
PSMD13	0.0069	1.01	(0.989-1.02)	0.59	0.441	0.989	1.02	1.01 (0.989-1.02)
MINK1	0.0098	1.01	(0.985-1.04)	0.59	0.441	0.985	1.04	1.01 (0.985-1.04)
PPP3CA	-0.015	0.985	(0.947-1.02)	0.59	0.441	0.947	1.02	0.985 (0.947-1.02)
APEX2	0.012	1.01	(0.982-1.04)	0.59	0.442	0.982	1.04	1.01 (0.982-1.04)
CDC45	-0.019	0.981	(0.935-1.03)	0.59	0.443	0.935	1.03	0.981 (0.935-1.03)
NUP37	-0.02	0.98	(0.931-1.03)	0.59	0.443	0.931	1.03	0.98 (0.931-1.03)
WRN	-0.045	0.956	(0.853-1.07)	0.59	0.444	0.853	1.07	0.956 (0.853-1.07)
PDCD10	-0.013	0.987	(0.954-1.02)	0.58	0.447	0.954	1.02	0.987 (0.954-1.02)
ARPC2	-0.0079	0.992	(0.972-1.01)	0.58	0.447	0.972	1.01	0.992 (0.972-1.01)
RNASEH2B	-0.033	0.968	(0.889-1.05)	0.57	0.448	0.889	1.05	0.968 (0.889-1.05)
PSMD8	-0.0037	0.996	(0.987-1.01)	0.57	0.448	0.987	1.01	0.996 (0.987-1.01)
NUP188	0.019	1.02	(0.971-1.07)	0.57	0.449	0.971	1.07	1.02 (0.971-1.07)
SMAD4	-0.039	0.962	(0.871-1.06)	0.57	0.449	0.871	1.06	0.962 (0.871-1.06)
YWHAE	-0.0016	0.998	(0.994-1)	0.57	0.451	0.994	1	0.998 (0.994-1)
MITF	-0.061	0.941	(0.802-1.1)	0.57	0.451	0.802	1.1	0.941 (0.802-1.1)
POLR2B	-0.015	0.985	(0.948-1.02)	0.57	0.451	0.948	1.02	0.985 (0.948-1.02)
NUDT16	0.032	1.03	(0.95-1.12)	0.57	0.451	0.95	1.12	1.03 (0.95-1.12)
EIF4A1	-0.063	0.938	(0.795-1.11)	0.57	0.452	0.795	1.11	0.938 (0.795-1.11)
GTF2E2	-0.012	0.988	(0.957-1.02)	0.57	0.452	0.957	1.02	0.988 (0.957-1.02)
RBP4	0.0029	1	(0.995-1.01)	0.56	0.453	0.995	1.01	1 (0.995-1.01)
TIA1	-0.012	0.988	(0.957-1.02)	0.56	0.454	0.957	1.02	0.988 (0.957-1.02)
SLX1B	2.1	8.23	(0.0331-2050)	0.56	0.454	0.0331	2050	8.23 (0.0331-2050)
NFATC2	-0.045	0.956	(0.85-1.08)	0.56	0.455	0.85	1.08	0.956 (0.85-1.08)
MICA	0.025	1.02	(0.961-1.09)	0.56	0.456	0.961	1.09	1.02 (0.961-1.09)
MDM4	-0.015	0.985	(0.946-1.03)	0.55	0.457	0.946	1.03	0.985 (0.946-1.03)
PCBP4	0.019	1.02	(0.97-1.07)	0.55	0.457	0.97	1.07	1.02 (0.97-1.07)
RMI2	0.018	1.02	(0.97-1.07)	0.55	0.458	0.97	1.07	1.02 (0.97-1.07)
IFNGR2	0.0061	1.01	(0.99-1.02)	0.55	0.458	0.99	1.02	1.01 (0.99-1.02)
PRKCD	0.0095	1.01	(0.985-1.04)	0.55	0.458	0.985	1.04	1.01 (0.985-1.04)
SMC2	-0.022	0.978	(0.923-1.04)	0.55	0.458	0.923	1.04	0.978 (0.923-1.04)
UFL1	-0.017	0.983	(0.939-1.03)	0.55	0.458	0.939	1.03	0.983 (0.939-1.03)
PSG2	-2.3	0.105	(0.000275-40.2)	0.55	0.458	0.000275	40.2	0.105 (0.000275-40.2)
WNT11	0.0029	1	(0.995-1.01)	0.55	0.46	0.995	1.01	1 (0.995-1.01)
BOD1L1	-0.041	0.96	(0.861-1.07)	0.54	0.461	0.861	1.07	0.96 (0.861-1.07)
RADX	0.14	1.15	(0.799-1.64)	0.54	0.461	0.799	1.64	1.15 (0.799-1.64)
MAPK3	0.004	1	(0.993-1.01)	0.54	0.461	0.993	1.01	1 (0.993-1.01)
ERCC4	-0.17	0.844	(0.539-1.32)	0.54	0.461	0.539	1.32	0.844 (0.539-1.32)
KAT5	0.03	1.03	(0.951-1.12)	0.54	0.463	0.951	1.12	1.03 (0.951-1.12)
RAD51AP1	0.014	1.01	(0.977-1.05)	0.54	0.463	0.977	1.05	1.01 (0.977-1.05)
CHAF1A	0.019	1.02	(0.969-1.07)	0.54	0.463	0.969	1.07	1.02 (0.969-1.07)
USP28	-0.045	0.956	(0.848-1.08)	0.54	0.464	0.848	1.08	0.956 (0.848-1.08)
CACNA1I	-0.57	0.568	(0.124-2.6)	0.53	0.465	0.124	2.6	0.568 (0.124-2.6)
EGR1	-0.0013	0.999	(0.995-1)	0.53	0.465	0.995	1	0.999 (0.995-1)
RFC1	-0.029	0.972	(0.899-1.05)	0.53	0.466	0.899	1.05	0.972 (0.899-1.05)
UBE2V1	-0.032	0.969	(0.889-1.06)	0.53	0.467	0.889	1.06	0.969 (0.889-1.06)
ANKRD11	0.034	1.03	(0.944-1.13)	0.53	0.469	0.944	1.13	1.03 (0.944-1.13)
MCM7	0.0027	1	(0.995-1.01)	0.52	0.469	0.995	1.01	1 (0.995-1.01)
PSMB1	-0.0024	0.998	(0.991-1)	0.52	0.47	0.991	1	0.998 (0.991-1)
RBM24	0.11	1.11	(0.831-1.49)	0.52	0.471	0.831	1.49	1.11 (0.831-1.49)
HNMT	-0.012	0.988	(0.955-1.02)	0.52	0.471	0.955	1.02	0.988 (0.955-1.02)
PSMD7	0.0068	1.01	(0.988-1.03)	0.52	0.472	0.988	1.03	1.01 (0.988-1.03)
SHLD1	0.017	1.02	(0.971-1.06)	0.51	0.474	0.971	1.06	1.02 (0.971-1.06)
TLN1	0.0049	1	(0.992-1.02)	0.51	0.475	0.992	1.02	1 (0.992-1.02)
BCL2	0.074	1.08	(0.88-1.32)	0.51	0.475	0.88	1.32	1.08 (0.88-1.32)
CUL4A	-0.0092	0.991	(0.966-1.02)	0.51	0.475	0.966	1.02	0.991 (0.966-1.02)
RPA1	0.013	1.01	(0.977-1.05)	0.5	0.478	0.977	1.05	1.01 (0.977-1.05)
DOT1L	0.034	1.03	(0.942-1.14)	0.5	0.478	0.942	1.14	1.03 (0.942-1.14)
KDM2A	0.021	1.02	(0.964-1.08)	0.5	0.479	0.964	1.08	1.02 (0.964-1.08)
E2F1	0.0075	1.01	(0.987-1.03)	0.5	0.48	0.987	1.03	1.01 (0.987-1.03)
PDE4DIP	-0.12	0.889	(0.641-1.23)	0.5	0.481	0.641	1.23	0.889 (0.641-1.23)
OGG1	0.083	1.09	(0.862-1.37)	0.5	0.482	0.862	1.37	1.09 (0.862-1.37)
SPIRE1	0.048	1.05	(0.918-1.2)	0.5	0.482	0.918	1.2	1.05 (0.918-1.2)
BTG2	0.0023	1	(0.996-1.01)	0.49	0.482	0.996	1.01	1 (0.996-1.01)
BBC3	0.017	1.02	(0.97-1.07)	0.49	0.483	0.97	1.07	1.02 (0.97-1.07)
ATP5ME	-0.0014	0.999	(0.995-1)	0.49	0.483	0.995	1	0.999 (0.995-1)
RMI1	-0.029	0.971	(0.895-1.05)	0.49	0.483	0.895	1.05	0.971 (0.895-1.05)
PPP1R14A	0.014	1.01	(0.974-1.06)	0.49	0.486	0.974	1.06	1.01 (0.974-1.06)
UBE2W	-0.022	0.978	(0.919-1.04)	0.49	0.486	0.919	1.04	0.978 (0.919-1.04)
MSH5	0.074	1.08	(0.874-1.33)	0.49	0.486	0.874	1.33	1.08 (0.874-1.33)
SIRT1	-0.03	0.97	(0.892-1.06)	0.48	0.488	0.892	1.06	0.97 (0.892-1.06)
NFIB	-0.02	0.98	(0.926-1.04)	0.48	0.488	0.926	1.04	0.98 (0.926-1.04)
PSMC4	0.0045	1	(0.992-1.02)	0.48	0.489	0.992	1.02	1 (0.992-1.02)
NMT1	0.015	1.01	(0.973-1.06)	0.48	0.489	0.973	1.06	1.01 (0.973-1.06)
USP16	-0.025	0.975	(0.907-1.05)	0.47	0.491	0.907	1.05	0.975 (0.907-1.05)
PHF3	-0.016	0.984	(0.942-1.03)	0.47	0.492	0.942	1.03	0.984 (0.942-1.03)
ARNT2	0.053	1.05	(0.906-1.23)	0.47	0.492	0.906	1.23	1.05 (0.906-1.23)
NSMCE2	-0.017	0.984	(0.938-1.03)	0.47	0.492	0.938	1.03	0.984 (0.938-1.03)
PHLDA1	-0.0042	0.996	(0.984-1.01)	0.47	0.492	0.984	1.01	0.996 (0.984-1.01)
SLCO2A1	-0.019	0.981	(0.928-1.04)	0.47	0.493	0.928	1.04	0.981 (0.928-1.04)
PIK3R5	-0.083	0.92	(0.726-1.17)	0.47	0.493	0.726	1.17	0.92 (0.726-1.17)
PYCARD	0.0032	1	(0.994-1.01)	0.47	0.493	0.994	1.01	1 (0.994-1.01)
C14orf39	-1.7	0.18	(0.00133-24.5)	0.47	0.494	0.00133	24.5	0.18 (0.00133-24.5)
CALU	-0.0035	0.996	(0.987-1.01)	0.47	0.494	0.987	1.01	0.996 (0.987-1.01)
FOXO4	0.019	1.02	(0.966-1.07)	0.47	0.495	0.966	1.07	1.02 (0.966-1.07)
PARP1	0.0084	1.01	(0.984-1.03)	0.47	0.495	0.984	1.03	1.01 (0.984-1.03)
RNF8	0.059	1.06	(0.896-1.26)	0.46	0.496	0.896	1.26	1.06 (0.896-1.26)
MBD4	0.026	1.03	(0.953-1.1)	0.46	0.497	0.953	1.1	1.03 (0.953-1.1)
APTX	0.029	1.03	(0.947-1.12)	0.46	0.497	0.947	1.12	1.03 (0.947-1.12)
CASP2	0.021	1.02	(0.962-1.08)	0.46	0.497	0.962	1.08	1.02 (0.962-1.08)
SAA1	0.00054	1	(0.999-1)	0.46	0.498	0.999	1	1 (0.999-1)
RHOD	0.0055	1.01	(0.99-1.02)	0.46	0.498	0.99	1.02	1.01 (0.99-1.02)
BID	-0.011	0.989	(0.956-1.02)	0.46	0.499	0.956	1.02	0.989 (0.956-1.02)
PIK3R3	-0.052	0.949	(0.815-1.1)	0.45	0.501	0.815	1.1	0.949 (0.815-1.1)
CEBPG	-0.0092	0.991	(0.965-1.02)	0.45	0.501	0.965	1.02	0.991 (0.965-1.02)
NRAS	-0.0073	0.993	(0.972-1.01)	0.45	0.504	0.972	1.01	0.993 (0.972-1.01)
MAPK14	-0.016	0.984	(0.94-1.03)	0.45	0.504	0.94	1.03	0.984 (0.94-1.03)
SLC6A12	0.19	1.21	(0.692-2.11)	0.45	0.504	0.692	2.11	1.21 (0.692-2.11)
GALNT2	0.014	1.01	(0.974-1.06)	0.44	0.506	0.974	1.06	1.01 (0.974-1.06)
PIAS3	0.032	1.03	(0.939-1.14)	0.44	0.506	0.939	1.14	1.03 (0.939-1.14)
RBBP6	0.025	1.02	(0.953-1.1)	0.44	0.507	0.953	1.1	1.02 (0.953-1.1)
HERC2	-0.033	0.967	(0.877-1.07)	0.44	0.507	0.877	1.07	0.967 (0.877-1.07)
ETAA1	-0.036	0.964	(0.867-1.07)	0.44	0.508	0.867	1.07	0.964 (0.867-1.07)
PSMC6	-0.02	0.98	(0.923-1.04)	0.44	0.509	0.923	1.04	0.98 (0.923-1.04)
PSMB8	-0.0015	0.998	(0.994-1)	0.44	0.509	0.994	1	0.998 (0.994-1)
CASP6	-0.0059	0.994	(0.977-1.01)	0.44	0.509	0.977	1.01	0.994 (0.977-1.01)
USP1	-0.012	0.988	(0.953-1.02)	0.44	0.509	0.953	1.02	0.988 (0.953-1.02)
UBE2E2	0.036	1.04	(0.931-1.15)	0.43	0.51	0.931	1.15	1.04 (0.931-1.15)
NFIC	-0.017	0.983	(0.934-1.03)	0.43	0.512	0.934	1.03	0.983 (0.934-1.03)
FANCM	-0.12	0.889	(0.625-1.26)	0.43	0.512	0.625	1.26	0.889 (0.625-1.26)
COPS3	-0.0085	0.992	(0.967-1.02)	0.43	0.513	0.967	1.02	0.992 (0.967-1.02)
BRSK1	0.084	1.09	(0.846-1.4)	0.43	0.513	0.846	1.4	1.09 (0.846-1.4)
BAP1	0.013	1.01	(0.974-1.05)	0.43	0.513	0.974	1.05	1.01 (0.974-1.05)
TLK1	-0.021	0.979	(0.92-1.04)	0.43	0.514	0.92	1.04	0.979 (0.92-1.04)
HUS1B	-0.41	0.662	(0.19-2.3)	0.42	0.516	0.19	2.3	0.662 (0.19-2.3)
TAF10	0.014	1.01	(0.973-1.06)	0.42	0.518	0.973	1.06	1.01 (0.973-1.06)
ENTPD1	-0.028	0.972	(0.892-1.06)	0.42	0.518	0.892	1.06	0.972 (0.892-1.06)
PPP4C	0.0022	1	(0.995-1.01)	0.42	0.519	0.995	1.01	1 (0.995-1.01)
MMS22L	-0.068	0.934	(0.758-1.15)	0.41	0.519	0.758	1.15	0.934 (0.758-1.15)
EGLN3	-0.01	0.99	(0.96-1.02)	0.42	0.519	0.96	1.02	0.99 (0.96-1.02)
RUVBL2	0.003	1	(0.994-1.01)	0.42	0.519	0.994	1.01	1 (0.994-1.01)
DONSON	-0.034	0.967	(0.873-1.07)	0.41	0.52	0.873	1.07	0.967 (0.873-1.07)
ATP23	-0.029	0.971	(0.888-1.06)	0.41	0.521	0.888	1.06	0.971 (0.888-1.06)
PARG	-0.04	0.961	(0.851-1.09)	0.41	0.521	0.851	1.09	0.961 (0.851-1.09)
UNG	0.0058	1.01	(0.988-1.02)	0.41	0.521	0.988	1.02	1.01 (0.988-1.02)
GTSE1	-0.028	0.972	(0.892-1.06)	0.41	0.522	0.892	1.06	0.972 (0.892-1.06)
FXR1	0.022	1.02	(0.955-1.1)	0.41	0.523	0.955	1.1	1.02 (0.955-1.1)
NUAK1	0.03	1.03	(0.939-1.13)	0.41	0.523	0.939	1.13	1.03 (0.939-1.13)
NONO	0.0022	1	(0.995-1.01)	0.41	0.523	0.995	1.01	1 (0.995-1.01)
DBT	-0.066	0.936	(0.765-1.15)	0.41	0.523	0.765	1.15	0.936 (0.765-1.15)
CNKSR1	0.017	1.02	(0.966-1.07)	0.41	0.524	0.966	1.07	1.02 (0.966-1.07)
JMY	-0.036	0.965	(0.863-1.08)	0.4	0.525	0.863	1.08	0.965 (0.863-1.08)
PPIA	0.0013	1	(0.997-1.01)	0.4	0.526	0.997	1.01	1 (0.997-1.01)
TNP1	-1.8	0.171	(0.000727-40.1)	0.4	0.526	0.000727	40.1	0.171 (0.000727-40.1)
PAFAH1B3	-0.0035	0.996	(0.986-1.01)	0.4	0.527	0.986	1.01	0.996 (0.986-1.01)
ENPP5	0.043	1.04	(0.914-1.19)	0.4	0.527	0.914	1.19	1.04 (0.914-1.19)
DDB1	0.014	1.01	(0.972-1.06)	0.4	0.528	0.972	1.06	1.01 (0.972-1.06)
CEPT1	-0.038	0.963	(0.855-1.08)	0.4	0.528	0.855	1.08	0.963 (0.855-1.08)
PIK3C2B	0.018	1.02	(0.963-1.08)	0.4	0.528	0.963	1.08	1.02 (0.963-1.08)
CDK1	-0.0068	0.993	(0.972-1.01)	0.4	0.528	0.972	1.01	0.993 (0.972-1.01)
USP43	-0.057	0.944	(0.789-1.13)	0.39	0.53	0.789	1.13	0.944 (0.789-1.13)
WNT3	0.1	1.11	(0.807-1.52)	0.39	0.53	0.807	1.52	1.11 (0.807-1.52)
PMS1	-0.044	0.957	(0.836-1.1)	0.39	0.53	0.836	1.1	0.957 (0.836-1.1)
UBE2A	-0.01	0.99	(0.959-1.02)	0.39	0.532	0.959	1.02	0.99 (0.959-1.02)
TOM1L2	0.024	1.02	(0.949-1.11)	0.38	0.536	0.949	1.11	1.02 (0.949-1.11)
MCM3AP	0.021	1.02	(0.956-1.09)	0.38	0.536	0.956	1.09	1.02 (0.956-1.09)
TEP1	-0.029	0.971	(0.885-1.07)	0.38	0.536	0.885	1.07	0.971 (0.885-1.07)
SYF2	0.011	1.01	(0.976-1.05)	0.38	0.537	0.976	1.05	1.01 (0.976-1.05)
CXCL12	0.013	1.01	(0.972-1.06)	0.38	0.538	0.972	1.06	1.01 (0.972-1.06)
WNT1	0.42	1.52	(0.399-5.81)	0.38	0.539	0.399	5.81	1.52 (0.399-5.81)
CCNG2	-0.025	0.975	(0.901-1.06)	0.38	0.539	0.901	1.06	0.975 (0.901-1.06)
CD209	-0.04	0.96	(0.844-1.09)	0.37	0.541	0.844	1.09	0.96 (0.844-1.09)
RBX1	-0.011	0.989	(0.954-1.02)	0.37	0.541	0.954	1.02	0.989 (0.954-1.02)
CCNK	-0.096	0.908	(0.667-1.24)	0.37	0.542	0.667	1.24	0.908 (0.667-1.24)
CIB1	0.001	1	(0.998-1)	0.37	0.543	0.998	1	1 (0.998-1)
ORC2	-0.024	0.976	(0.902-1.06)	0.37	0.543	0.902	1.06	0.976 (0.902-1.06)
RNF168	-0.024	0.976	(0.904-1.05)	0.37	0.543	0.904	1.05	0.976 (0.904-1.05)
GTF2H2	-0.21	0.811	(0.412-1.6)	0.37	0.544	0.412	1.6	0.811 (0.412-1.6)
CHD2	-0.02	0.98	(0.919-1.05)	0.37	0.544	0.919	1.05	0.98 (0.919-1.05)
TCEA1	-0.0083	0.992	(0.966-1.02)	0.37	0.544	0.966	1.02	0.992 (0.966-1.02)
STUB1	0.0065	1.01	(0.986-1.03)	0.37	0.544	0.986	1.03	1.01 (0.986-1.03)
XPA	0.025	1.02	(0.946-1.11)	0.37	0.545	0.946	1.11	1.02 (0.946-1.11)
FOS	-0.0007	0.999	(0.997-1)	0.37	0.545	0.997	1	0.999 (0.997-1)
TNFRSF1B	-0.0063	0.994	(0.973-1.01)	0.36	0.546	0.973	1.01	0.994 (0.973-1.01)
ANXA1	0.0023	1	(0.995-1.01)	0.36	0.547	0.995	1.01	1 (0.995-1.01)
WNT2B	-0.1	0.902	(0.644-1.26)	0.36	0.549	0.644	1.26	0.902 (0.644-1.26)
PIK3CA	-0.032	0.968	(0.871-1.08)	0.36	0.55	0.871	1.08	0.968 (0.871-1.08)
AKT1	0.014	1.01	(0.968-1.06)	0.36	0.551	0.968	1.06	1.01 (0.968-1.06)
YWHAQ	-0.0018	0.998	(0.992-1)	0.35	0.552	0.992	1	0.998 (0.992-1)
NFIX	0.0085	1.01	(0.981-1.04)	0.35	0.553	0.981	1.04	1.01 (0.981-1.04)
CAT	0.0044	1	(0.99-1.02)	0.35	0.553	0.99	1.02	1 (0.99-1.02)
PRIM2	-0.039	0.962	(0.846-1.09)	0.35	0.554	0.846	1.09	0.962 (0.846-1.09)
RAD51B	-0.07	0.932	(0.739-1.18)	0.35	0.555	0.739	1.18	0.932 (0.739-1.18)
PARK7	-0.0019	0.998	(0.992-1)	0.34	0.557	0.992	1	0.998 (0.992-1)
AHCY	-0.00079	0.999	(0.997-1)	0.34	0.557	0.997	1	0.999 (0.997-1)
CYP19A1	-0.16	0.852	(0.497-1.46)	0.34	0.559	0.497	1.46	0.852 (0.497-1.46)
TOP3A	0.038	1.04	(0.915-1.18)	0.34	0.559	0.915	1.18	1.04 (0.915-1.18)
ZRANB3	-0.13	0.874	(0.557-1.37)	0.34	0.559	0.557	1.37	0.874 (0.557-1.37)
CCNT2	-0.021	0.979	(0.912-1.05)	0.34	0.56	0.912	1.05	0.979 (0.912-1.05)
ZBTB1	-0.022	0.978	(0.906-1.06)	0.33	0.563	0.906	1.06	0.978 (0.906-1.06)
COP1	-0.015	0.986	(0.938-1.04)	0.33	0.564	0.938	1.04	0.986 (0.938-1.04)
MRE11P1	-2.5	0.0848	(1.95e-05-368)	0.33	0.564	1.95e-05	368	0.0848 (1.95e-05-368)
IER3	-0.00067	0.999	(0.997-1)	0.33	0.565	0.997	1	0.999 (0.997-1)
VCAM1	-0.026	0.974	(0.892-1.06)	0.33	0.567	0.892	1.06	0.974 (0.892-1.06)
XRCC5	-0.0031	0.997	(0.986-1.01)	0.33	0.567	0.986	1.01	0.997 (0.986-1.01)
NHEJ1	-0.26	0.769	(0.313-1.89)	0.33	0.568	0.313	1.89	0.769 (0.313-1.89)
PSME3	-0.0063	0.994	(0.973-1.02)	0.33	0.568	0.973	1.02	0.994 (0.973-1.02)
ASF1A	-0.015	0.985	(0.935-1.04)	0.32	0.569	0.935	1.04	0.985 (0.935-1.04)
COPB2	-0.011	0.989	(0.953-1.03)	0.32	0.569	0.953	1.03	0.989 (0.953-1.03)
RFC4	0.015	1.02	(0.964-1.07)	0.32	0.57	0.964	1.07	1.02 (0.964-1.07)
CD53	-0.0044	0.996	(0.981-1.01)	0.32	0.57	0.981	1.01	0.996 (0.981-1.01)
CDK2AP1	0.009	1.01	(0.978-1.04)	0.32	0.572	0.978	1.04	1.01 (0.978-1.04)
CDK4	0.0038	1	(0.991-1.02)	0.32	0.573	0.991	1.02	1 (0.991-1.02)
TIPRL	-0.01	0.99	(0.955-1.03)	0.32	0.573	0.955	1.03	0.99 (0.955-1.03)
FBXO5	-0.033	0.967	(0.862-1.09)	0.32	0.573	0.862	1.09	0.967 (0.862-1.09)
ATM	-0.027	0.973	(0.886-1.07)	0.32	0.574	0.886	1.07	0.973 (0.886-1.07)
PDCD5	-0.0042	0.996	(0.981-1.01)	0.32	0.574	0.981	1.01	0.996 (0.981-1.01)
DDB2	0.019	1.02	(0.953-1.09)	0.32	0.575	0.953	1.09	1.02 (0.953-1.09)
POLR2K	-0.0039	0.996	(0.982-1.01)	0.31	0.576	0.982	1.01	0.996 (0.982-1.01)
TAOK3	-0.032	0.969	(0.867-1.08)	0.31	0.579	0.867	1.08	0.969 (0.867-1.08)
CBX4	0.0078	1.01	(0.98-1.04)	0.31	0.579	0.98	1.04	1.01 (0.98-1.04)
PSMA8	1.3	3.68	(0.034-397)	0.3	0.586	0.034	397	3.68 (0.034-397)
ZNF507	-0.032	0.968	(0.861-1.09)	0.29	0.587	0.861	1.09	0.968 (0.861-1.09)
MAP3K1	-0.028	0.972	(0.877-1.08)	0.29	0.588	0.877	1.08	0.972 (0.877-1.08)
POLDIP2	0.0022	1	(0.994-1.01)	0.29	0.589	0.994	1.01	1 (0.994-1.01)
CEBPB	0.003	1	(0.992-1.01)	0.29	0.589	0.992	1.01	1 (0.992-1.01)
NUP85	0.017	1.02	(0.955-1.08)	0.29	0.591	0.955	1.08	1.02 (0.955-1.08)
ARPC4	-0.0045	0.995	(0.979-1.01)	0.29	0.592	0.979	1.01	0.995 (0.979-1.01)
MAD2L2	0.015	1.01	(0.961-1.07)	0.29	0.593	0.961	1.07	1.01 (0.961-1.07)
COPS5	0.014	1.01	(0.963-1.07)	0.28	0.594	0.963	1.07	1.01 (0.963-1.07)
KDM4A	0.018	1.02	(0.953-1.09)	0.28	0.594	0.953	1.09	1.02 (0.953-1.09)
AURKA	-0.006	0.994	(0.972-1.02)	0.28	0.596	0.972	1.02	0.994 (0.972-1.02)
ASMTL	-0.011	0.989	(0.951-1.03)	0.28	0.596	0.951	1.03	0.989 (0.951-1.03)
MNAT1	0.04	1.04	(0.896-1.21)	0.28	0.598	0.896	1.21	1.04 (0.896-1.21)
ZDHHC16	0.016	1.02	(0.958-1.08)	0.28	0.599	0.958	1.08	1.02 (0.958-1.08)
MLH3	0.023	1.02	(0.939-1.12)	0.28	0.599	0.939	1.12	1.02 (0.939-1.12)
CCL13	-0.011	0.989	(0.947-1.03)	0.28	0.599	0.947	1.03	0.989 (0.947-1.03)
MPG	-0.0047	0.995	(0.978-1.01)	0.28	0.6	0.978	1.01	0.995 (0.978-1.01)
FANCD2	-0.036	0.965	(0.843-1.1)	0.27	0.601	0.843	1.1	0.965 (0.843-1.1)
GTF2H3	-0.014	0.986	(0.937-1.04)	0.27	0.602	0.937	1.04	0.986 (0.937-1.04)
PRKDC	-0.0049	0.995	(0.977-1.01)	0.27	0.603	0.977	1.01	0.995 (0.977-1.01)
MRPS11	0.038	1.04	(0.899-1.2)	0.27	0.604	0.899	1.2	1.04 (0.899-1.2)
ALKBH8	0.062	1.06	(0.842-1.34)	0.27	0.605	0.842	1.34	1.06 (0.842-1.34)
PSMB9	-0.0022	0.998	(0.99-1.01)	0.27	0.605	0.99	1.01	0.998 (0.99-1.01)
SMC3	0.0078	1.01	(0.978-1.04)	0.27	0.606	0.978	1.04	1.01 (0.978-1.04)
CHRAC1	0.0092	1.01	(0.975-1.05)	0.27	0.606	0.975	1.05	1.01 (0.975-1.05)
CNOT4	-0.033	0.968	(0.854-1.1)	0.26	0.607	0.854	1.1	0.968 (0.854-1.1)
METTL3	0.026	1.03	(0.928-1.14)	0.26	0.608	0.928	1.14	1.03 (0.928-1.14)
TEX15	0.86	2.37	(0.0863-65.4)	0.26	0.609	0.0863	65.4	2.37 (0.0863-65.4)
NCOA6	-0.011	0.989	(0.949-1.03)	0.26	0.611	0.949	1.03	0.989 (0.949-1.03)
TP53BP1	0.029	1.03	(0.922-1.15)	0.26	0.611	0.922	1.15	1.03 (0.922-1.15)
HMGB1	-0.0027	0.997	(0.987-1.01)	0.26	0.612	0.987	1.01	0.997 (0.987-1.01)
PLK3	0.018	1.02	(0.949-1.09)	0.26	0.613	0.949	1.09	1.02 (0.949-1.09)
ZNF365	0.43	1.54	(0.288-8.26)	0.26	0.613	0.288	8.26	1.54 (0.288-8.26)
RCOR1	-0.015	0.985	(0.929-1.04)	0.25	0.614	0.929	1.04	0.985 (0.929-1.04)
CDC6	-0.0065	0.993	(0.969-1.02)	0.26	0.614	0.969	1.02	0.993 (0.969-1.02)
IL18R1	-0.085	0.918	(0.659-1.28)	0.25	0.615	0.659	1.28	0.918 (0.659-1.28)
POLE2	-0.031	0.97	(0.861-1.09)	0.25	0.616	0.861	1.09	0.97 (0.861-1.09)
USP51	0.25	1.29	(0.482-3.43)	0.25	0.616	0.482	3.43	1.29 (0.482-3.43)
SERPINB6	0.0021	1	(0.994-1.01)	0.25	0.616	0.994	1.01	1 (0.994-1.01)
APEX1	-0.0016	0.998	(0.992-1)	0.25	0.617	0.992	1	0.998 (0.992-1)
PIK3R1	-0.016	0.985	(0.926-1.05)	0.25	0.617	0.926	1.05	0.985 (0.926-1.05)
PRKCA	-0.022	0.979	(0.899-1.07)	0.25	0.617	0.899	1.07	0.979 (0.899-1.07)
FAM168A	0.018	1.02	(0.947-1.1)	0.25	0.618	0.947	1.1	1.02 (0.947-1.1)
UBE2I	-0.012	0.988	(0.941-1.04)	0.25	0.619	0.941	1.04	0.988 (0.941-1.04)
ATOX1	-0.02	0.98	(0.904-1.06)	0.24	0.623	0.904	1.06	0.98 (0.904-1.06)
SOX4	-0.0033	0.997	(0.983-1.01)	0.24	0.625	0.983	1.01	0.997 (0.983-1.01)
CTCF	0.013	1.01	(0.96-1.07)	0.24	0.627	0.96	1.07	1.01 (0.96-1.07)
HGF	-0.079	0.924	(0.671-1.27)	0.24	0.627	0.671	1.27	0.924 (0.671-1.27)
EYA4	-0.24	0.786	(0.297-2.08)	0.23	0.628	0.297	2.08	0.786 (0.297-2.08)
ALDH8A1	-0.17	0.842	(0.42-1.69)	0.23	0.628	0.42	1.69	0.842 (0.42-1.69)
PMS2P3	0.056	1.06	(0.843-1.33)	0.23	0.629	0.843	1.33	1.06 (0.843-1.33)
SIRT6	0.0081	1.01	(0.975-1.04)	0.23	0.629	0.975	1.04	1.01 (0.975-1.04)
NRP2	0.018	1.02	(0.946-1.1)	0.23	0.63	0.946	1.1	1.02 (0.946-1.1)
QPCT	-0.0036	0.996	(0.982-1.01)	0.23	0.63	0.982	1.01	0.996 (0.982-1.01)
PRDX4	-0.0013	0.999	(0.993-1)	0.23	0.633	0.993	1	0.999 (0.993-1)
TNF	-0.085	0.918	(0.647-1.3)	0.23	0.633	0.647	1.3	0.918 (0.647-1.3)
ID1	0.00037	1	(0.999-1)	0.23	0.633	0.999	1	1 (0.999-1)
MBD1	0.024	1.02	(0.929-1.13)	0.23	0.634	0.929	1.13	1.02 (0.929-1.13)
PRG2	-1.2	0.29	(0.00177-47.6)	0.23	0.634	0.00177	47.6	0.29 (0.00177-47.6)
MSX2	-0.0055	0.994	(0.972-1.02)	0.23	0.635	0.972	1.02	0.994 (0.972-1.02)
ALKBH3	-0.016	0.984	(0.923-1.05)	0.22	0.636	0.923	1.05	0.984 (0.923-1.05)
AP1G1	-0.013	0.987	(0.934-1.04)	0.22	0.636	0.934	1.04	0.987 (0.934-1.04)
CBX3	0.0019	1	(0.994-1.01)	0.22	0.636	0.994	1.01	1 (0.994-1.01)
CDKN1A	-0.0014	0.999	(0.993-1)	0.22	0.637	0.993	1	0.999 (0.993-1)
CXCR4	0.0026	1	(0.992-1.01)	0.22	0.637	0.992	1.01	1 (0.992-1.01)
PTH	0.36	1.43	(0.321-6.38)	0.22	0.638	0.321	6.38	1.43 (0.321-6.38)
MLH1	-0.014	0.986	(0.93-1.05)	0.22	0.638	0.93	1.05	0.986 (0.93-1.05)
PTGER4	0.012	1.01	(0.964-1.06)	0.22	0.638	0.964	1.06	1.01 (0.964-1.06)
CDK6	-0.0085	0.992	(0.957-1.03)	0.22	0.638	0.957	1.03	0.992 (0.957-1.03)
FBXO45	-0.021	0.979	(0.895-1.07)	0.22	0.64	0.895	1.07	0.979 (0.895-1.07)
SP100	-0.022	0.978	(0.89-1.07)	0.22	0.64	0.89	1.07	0.978 (0.89-1.07)
RAC1	0.0013	1	(0.996-1.01)	0.22	0.64	0.996	1.01	1 (0.996-1.01)
NUP43	-0.013	0.987	(0.934-1.04)	0.22	0.64	0.934	1.04	0.987 (0.934-1.04)
MARK3	-0.021	0.979	(0.897-1.07)	0.22	0.64	0.897	1.07	0.979 (0.897-1.07)
UBC	0.0009	1	(0.997-1)	0.22	0.641	0.997	1	1 (0.997-1)
PSMD9	0.063	1.07	(0.815-1.39)	0.22	0.642	0.815	1.39	1.07 (0.815-1.39)
TEX12	-0.16	0.849	(0.425-1.7)	0.21	0.643	0.425	1.7	0.849 (0.425-1.7)
YJU2	0.009	1.01	(0.971-1.05)	0.21	0.644	0.971	1.05	1.01 (0.971-1.05)
RFC2	0.007	1.01	(0.978-1.04)	0.21	0.644	0.978	1.04	1.01 (0.978-1.04)
HMOX1	0.0064	1.01	(0.979-1.03)	0.21	0.645	0.979	1.03	1.01 (0.979-1.03)
WNT10B	0.042	1.04	(0.871-1.25)	0.21	0.645	0.871	1.25	1.04 (0.871-1.25)
RAD21	-0.0025	0.998	(0.987-1.01)	0.21	0.646	0.987	1.01	0.998 (0.987-1.01)
FAAP24	0.057	1.06	(0.829-1.35)	0.21	0.646	0.829	1.35	1.06 (0.829-1.35)
ADAM12	-0.0085	0.992	(0.956-1.03)	0.21	0.648	0.956	1.03	0.992 (0.956-1.03)
SHISA5	0.0021	1	(0.993-1.01)	0.21	0.648	0.993	1.01	1 (0.993-1.01)
SYCP1	-0.81	0.444	(0.0136-14.6)	0.21	0.649	0.0136	14.6	0.444 (0.0136-14.6)
GIGYF2	-0.021	0.979	(0.894-1.07)	0.21	0.649	0.894	1.07	0.979 (0.894-1.07)
LIG1	0.011	1.01	(0.963-1.06)	0.21	0.65	0.963	1.06	1.01 (0.963-1.06)
ATP5MPL	-0.0045	0.995	(0.976-1.02)	0.21	0.65	0.976	1.02	0.995 (0.976-1.02)
RAD50	-0.013	0.987	(0.932-1.05)	0.21	0.65	0.932	1.05	0.987 (0.932-1.05)
CDC20B	-0.48	0.621	(0.0784-4.92)	0.2	0.652	0.0784	4.92	0.621 (0.0784-4.92)
HNRNPC	-0.0028	0.997	(0.985-1.01)	0.2	0.653	0.985	1.01	0.997 (0.985-1.01)
CAB39	-0.0072	0.993	(0.962-1.02)	0.2	0.653	0.962	1.02	0.993 (0.962-1.02)
IFI27	-0.00074	0.999	(0.996-1)	0.2	0.659	0.996	1	0.999 (0.996-1)
CTBP1	0.0086	1.01	(0.971-1.05)	0.19	0.659	0.971	1.05	1.01 (0.971-1.05)
PSMB6	0.0018	1	(0.994-1.01)	0.19	0.66	0.994	1.01	1 (0.994-1.01)
PSMD3	0.001	1	(0.996-1.01)	0.19	0.66	0.996	1.01	1 (0.996-1.01)
CHCHD6	0.016	1.02	(0.945-1.09)	0.19	0.66	0.945	1.09	1.02 (0.945-1.09)
MAP3K7	-0.017	0.983	(0.912-1.06)	0.19	0.661	0.912	1.06	0.983 (0.912-1.06)
RAD9B	0.18	1.19	(0.543-2.62)	0.19	0.661	0.543	2.62	1.19 (0.543-2.62)
CDC14B	-0.037	0.964	(0.817-1.14)	0.19	0.662	0.817	1.14	0.964 (0.817-1.14)
PRKCG	0.022	1.02	(0.926-1.13)	0.19	0.664	0.926	1.13	1.02 (0.926-1.13)
SMC6	-0.024	0.976	(0.875-1.09)	0.19	0.664	0.875	1.09	0.976 (0.875-1.09)
ERCC6L2	-0.033	0.968	(0.835-1.12)	0.19	0.664	0.835	1.12	0.968 (0.835-1.12)
FN1	0.00038	1	(0.999-1)	0.18	0.667	0.999	1	1 (0.999-1)
MCMDC2	0.072	1.07	(0.774-1.49)	0.18	0.668	0.774	1.49	1.07 (0.774-1.49)
ATP6V0B	-0.0019	0.998	(0.99-1.01)	0.18	0.668	0.99	1.01	0.998 (0.99-1.01)
LCN2	-6.4e-05	1	(1-1)	0.18	0.668	1	1	1 (1-1)
PPIE	0.02	1.02	(0.931-1.12)	0.18	0.669	0.931	1.12	1.02 (0.931-1.12)
MYC	0.00077	1	(0.997-1)	0.18	0.669	0.997	1	1 (0.997-1)
SYNC	-0.079	0.924	(0.644-1.33)	0.18	0.669	0.644	1.33	0.924 (0.644-1.33)
INO80	0.02	1.02	(0.93-1.12)	0.18	0.669	0.93	1.12	1.02 (0.93-1.12)
KRT13	-0.028	0.973	(0.855-1.11)	0.18	0.671	0.855	1.11	0.973 (0.855-1.11)
UBE2V2	-0.0098	0.99	(0.946-1.04)	0.18	0.671	0.946	1.04	0.99 (0.946-1.04)
CDK7	-0.0093	0.991	(0.949-1.03)	0.18	0.672	0.949	1.03	0.991 (0.949-1.03)
KMT5A	0.024	1.02	(0.917-1.14)	0.18	0.673	0.917	1.14	1.02 (0.917-1.14)
OARD1	0.022	1.02	(0.921-1.14)	0.18	0.675	0.921	1.14	1.02 (0.921-1.14)
GM2A	-0.0059	0.994	(0.967-1.02)	0.18	0.675	0.967	1.02	0.994 (0.967-1.02)
HBEGF	0.0033	1	(0.988-1.02)	0.17	0.676	0.988	1.02	1 (0.988-1.02)
INPP1	-0.011	0.989	(0.938-1.04)	0.17	0.676	0.938	1.04	0.989 (0.938-1.04)
PAXIP1	-0.047	0.954	(0.766-1.19)	0.18	0.676	0.766	1.19	0.954 (0.766-1.19)
MBD5	-0.061	0.941	(0.708-1.25)	0.17	0.677	0.708	1.25	0.941 (0.708-1.25)
GYPB	0.65	1.91	(0.0884-41.4)	0.17	0.679	0.0884	41.4	1.91 (0.0884-41.4)
FTO	-0.047	0.954	(0.76-1.2)	0.17	0.683	0.76	1.2	0.954 (0.76-1.2)
MCTS1	0.0058	1.01	(0.978-1.03)	0.17	0.683	0.978	1.03	1.01 (0.978-1.03)
RPS6KA6	-0.036	0.965	(0.812-1.15)	0.17	0.683	0.812	1.15	0.965 (0.812-1.15)
PGR	-0.22	0.801	(0.274-2.34)	0.16	0.685	0.274	2.34	0.801 (0.274-2.34)
ADAMTS3	-0.26	0.768	(0.214-2.76)	0.16	0.685	0.214	2.76	0.768 (0.214-2.76)
LRP1	-0.0038	0.996	(0.978-1.01)	0.16	0.687	0.978	1.01	0.996 (0.978-1.01)
NEK1	-0.049	0.952	(0.751-1.21)	0.16	0.687	0.751	1.21	0.952 (0.751-1.21)
KDM1A	0.0035	1	(0.986-1.02)	0.16	0.687	0.986	1.02	1 (0.986-1.02)
VCP	0.0019	1	(0.993-1.01)	0.16	0.687	0.993	1.01	1 (0.993-1.01)
COMMD1	-0.012	0.988	(0.931-1.05)	0.16	0.688	0.931	1.05	0.988 (0.931-1.05)
DDX18	0.0076	1.01	(0.971-1.05)	0.16	0.688	0.971	1.05	1.01 (0.971-1.05)
PSMD11	-0.0086	0.991	(0.95-1.03)	0.16	0.689	0.95	1.03	0.991 (0.95-1.03)
PFN1	0.00021	1	(0.999-1)	0.16	0.689	0.999	1	1 (0.999-1)
GBP1	-0.0042	0.996	(0.975-1.02)	0.16	0.692	0.975	1.02	0.996 (0.975-1.02)
FANCA	0.025	1.03	(0.904-1.16)	0.15	0.694	0.904	1.16	1.03 (0.904-1.16)
CCL2	-0.0061	0.994	(0.964-1.02)	0.15	0.694	0.964	1.02	0.994 (0.964-1.02)
POLE	0.023	1.02	(0.911-1.15)	0.15	0.695	0.911	1.15	1.02 (0.911-1.15)
LDHC	0.091	1.1	(0.695-1.73)	0.15	0.695	0.695	1.73	1.1 (0.695-1.73)
DSCAM	-1.1	0.326	(0.00118-89.9)	0.15	0.696	0.00118	89.9	0.326 (0.00118-89.9)
EYA1	-0.022	0.978	(0.874-1.09)	0.15	0.697	0.874	1.09	0.978 (0.874-1.09)
MUC1	-0.00082	0.999	(0.995-1)	0.15	0.698	0.995	1	0.999 (0.995-1)
KAT7	0.028	1.03	(0.892-1.19)	0.15	0.698	0.892	1.19	1.03 (0.892-1.19)
ERCC6	-0.05	0.951	(0.737-1.23)	0.15	0.7	0.737	1.23	0.951 (0.737-1.23)
EPHA1	0.0066	1.01	(0.973-1.04)	0.15	0.7	0.973	1.04	1.01 (0.973-1.04)
FANCE	-0.019	0.981	(0.889-1.08)	0.15	0.7	0.889	1.08	0.981 (0.889-1.08)
POLA2	-0.018	0.982	(0.893-1.08)	0.15	0.701	0.893	1.08	0.982 (0.893-1.08)
NPAS2	-0.018	0.982	(0.894-1.08)	0.15	0.701	0.894	1.08	0.982 (0.894-1.08)
SMC1A	-0.0053	0.995	(0.968-1.02)	0.15	0.702	0.968	1.02	0.995 (0.968-1.02)
TRIAP1	0.0046	1	(0.981-1.03)	0.14	0.706	0.981	1.03	1 (0.981-1.03)
PLA2R1	-0.022	0.978	(0.87-1.1)	0.14	0.706	0.87	1.1	0.978 (0.87-1.1)
CTNND1	-0.003	0.997	(0.982-1.01)	0.14	0.707	0.982	1.01	0.997 (0.982-1.01)
IKBKE	0.012	1.01	(0.951-1.08)	0.14	0.707	0.951	1.08	1.01 (0.951-1.08)
LIPC	0.013	1.01	(0.947-1.08)	0.14	0.707	0.947	1.08	1.01 (0.947-1.08)
GRB2	0.0046	1	(0.981-1.03)	0.14	0.708	0.981	1.03	1 (0.981-1.03)
FANCI	0.012	1.01	(0.951-1.08)	0.14	0.71	0.951	1.08	1.01 (0.951-1.08)
KRT8	0.00012	1	(0.999-1)	0.14	0.71	0.999	1	1 (0.999-1)
NUP155	-0.013	0.987	(0.924-1.06)	0.14	0.71	0.924	1.06	0.987 (0.924-1.06)
RECQL	-0.016	0.984	(0.906-1.07)	0.14	0.711	0.906	1.07	0.984 (0.906-1.07)
HIC1	0.045	1.05	(0.821-1.33)	0.13	0.714	0.821	1.33	1.05 (0.821-1.33)
SKP2	-0.0072	0.993	(0.955-1.03)	0.13	0.714	0.955	1.03	0.993 (0.955-1.03)
RBM5	0.012	1.01	(0.948-1.08)	0.13	0.714	0.948	1.08	1.01 (0.948-1.08)
ITGB1	-0.0016	0.998	(0.99-1.01)	0.13	0.715	0.99	1.01	0.998 (0.99-1.01)
TFDP3	-0.86	0.422	(0.00406-43.8)	0.13	0.716	0.00406	43.8	0.422 (0.00406-43.8)
CCNL2	0.005	1	(0.978-1.03)	0.13	0.717	0.978	1.03	1 (0.978-1.03)
BAX	-0.0023	0.998	(0.985-1.01)	0.13	0.718	0.985	1.01	0.998 (0.985-1.01)
CNN1	-0.0011	0.999	(0.993-1)	0.13	0.719	0.993	1	0.999 (0.993-1)
PSMB11	-1.8	0.16	(6.95e-06-3680)	0.13	0.721	6.95e-06	3680	0.16 (6.95e-06-3680)
GTF2H5	0.029	1.03	(0.878-1.21)	0.13	0.721	0.878	1.21	1.03 (0.878-1.21)
SAMHD1	-0.0039	0.996	(0.975-1.02)	0.13	0.722	0.975	1.02	0.996 (0.975-1.02)
NKX3-1	-0.065	0.937	(0.652-1.35)	0.13	0.723	0.652	1.35	0.937 (0.652-1.35)
SUMO2	-0.003	0.997	(0.98-1.01)	0.12	0.726	0.98	1.01	0.997 (0.98-1.01)
SLC35B1	-0.012	0.988	(0.923-1.06)	0.12	0.727	0.923	1.06	0.988 (0.923-1.06)
CNOT11	0.0041	1	(0.981-1.03)	0.12	0.728	0.981	1.03	1 (0.981-1.03)
BAK1	-0.0037	0.996	(0.975-1.02)	0.12	0.732	0.975	1.02	0.996 (0.975-1.02)
IRS1	0.013	1.01	(0.941-1.09)	0.12	0.732	0.941	1.09	1.01 (0.941-1.09)
SGPL1	-0.0096	0.99	(0.937-1.05)	0.12	0.734	0.937	1.05	0.99 (0.937-1.05)
NNMT	0.0019	1	(0.991-1.01)	0.11	0.735	0.991	1.01	1 (0.991-1.01)
MORF4L2	-0.0011	0.999	(0.992-1.01)	0.11	0.737	0.992	1.01	0.999 (0.992-1.01)
PDHA1	-0.0025	0.998	(0.983-1.01)	0.11	0.738	0.983	1.01	0.998 (0.983-1.01)
BCL2L11	-0.016	0.984	(0.895-1.08)	0.11	0.738	0.895	1.08	0.984 (0.895-1.08)
AKT3	-0.016	0.984	(0.896-1.08)	0.11	0.739	0.896	1.08	0.984 (0.896-1.08)
TBCA	-0.0032	0.997	(0.978-1.02)	0.11	0.74	0.978	1.02	0.997 (0.978-1.02)
SKAP1	0.007	1.01	(0.966-1.05)	0.11	0.742	0.966	1.05	1.01 (0.966-1.05)
FANCL	0.01	1.01	(0.952-1.07)	0.11	0.742	0.952	1.07	1.01 (0.952-1.07)
ST6GALNAC2	0.034	1.03	(0.846-1.26)	0.11	0.743	0.846	1.26	1.03 (0.846-1.26)
ORC4	-0.02	0.98	(0.871-1.1)	0.11	0.743	0.871	1.1	0.98 (0.871-1.1)
SOX9	-0.0009	0.999	(0.994-1)	0.11	0.743	0.994	1	0.999 (0.994-1)
CTBP2	0.01	1.01	(0.951-1.07)	0.11	0.744	0.951	1.07	1.01 (0.951-1.07)
CCNB2	-0.0042	0.996	(0.971-1.02)	0.11	0.744	0.971	1.02	0.996 (0.971-1.02)
CUL4B	-0.0059	0.994	(0.96-1.03)	0.11	0.744	0.96	1.03	0.994 (0.96-1.03)
RBM14	-0.008	0.992	(0.946-1.04)	0.11	0.744	0.946	1.04	0.992 (0.946-1.04)
PDCD2	-0.01	0.99	(0.932-1.05)	0.11	0.745	0.932	1.05	0.99 (0.932-1.05)
G6PC	0.58	1.78	(0.054-59)	0.11	0.746	0.054	59	1.78 (0.054-59)
MEF2C	-0.027	0.974	(0.828-1.15)	0.1	0.747	0.828	1.15	0.974 (0.828-1.15)
NSMCE4A	0.0073	1.01	(0.964-1.05)	0.1	0.747	0.964	1.05	1.01 (0.964-1.05)
FBLN2	0.0026	1	(0.987-1.02)	0.1	0.748	0.987	1.02	1 (0.987-1.02)
ORC5	0.012	1.01	(0.941-1.09)	0.1	0.748	0.941	1.09	1.01 (0.941-1.09)
YWHAB	-0.00051	0.999	(0.996-1)	0.1	0.75	0.996	1	0.999 (0.996-1)
MGAT2	0.036	1.04	(0.83-1.3)	0.1	0.751	0.83	1.3	1.04 (0.83-1.3)
GINS2	-0.0062	0.994	(0.957-1.03)	0.1	0.751	0.957	1.03	0.994 (0.957-1.03)
ZFYVE26	0.031	1.03	(0.852-1.25)	0.1	0.751	0.852	1.25	1.03 (0.852-1.25)
BRCC3	-0.0044	0.996	(0.969-1.02)	0.1	0.752	0.969	1.02	0.996 (0.969-1.02)
PSMB5	0.0012	1	(0.994-1.01)	0.1	0.757	0.994	1.01	1 (0.994-1.01)
YWHAZ	-0.0006	0.999	(0.996-1)	0.1	0.757	0.996	1	0.999 (0.996-1)
NUP210	-0.0035	0.996	(0.974-1.02)	0.09	0.758	0.974	1.02	0.996 (0.974-1.02)
ASCC1	0.023	1.02	(0.884-1.19)	0.09	0.758	0.884	1.19	1.02 (0.884-1.19)
PSMB4	0.00083	1	(0.996-1.01)	0.09	0.759	0.996	1.01	1 (0.996-1.01)
CD28	-0.066	0.936	(0.612-1.43)	0.09	0.76	0.612	1.43	0.936 (0.612-1.43)
TFDP2	-0.016	0.984	(0.887-1.09)	0.09	0.76	0.887	1.09	0.984 (0.887-1.09)
NUP153	-0.0067	0.993	(0.951-1.04)	0.09	0.76	0.951	1.04	0.993 (0.951-1.04)
RNASEH2A	-0.0028	0.997	(0.98-1.02)	0.09	0.761	0.98	1.02	0.997 (0.98-1.02)
GOLPH3	-0.0024	0.998	(0.982-1.01)	0.09	0.764	0.982	1.01	0.998 (0.982-1.01)
NUPR2	0.083	1.09	(0.63-1.87)	0.09	0.765	0.63	1.87	1.09 (0.63-1.87)
RAD51AP2	-0.21	0.81	(0.203-3.23)	0.09	0.765	0.203	3.23	0.81 (0.203-3.23)
LIG4	-0.011	0.989	(0.917-1.07)	0.09	0.766	0.917	1.07	0.989 (0.917-1.07)
PSMD5	-0.0091	0.991	(0.933-1.05)	0.09	0.766	0.933	1.05	0.991 (0.933-1.05)
CDCA7	-0.0013	0.999	(0.99-1.01)	0.09	0.77	0.99	1.01	0.999 (0.99-1.01)
HMGB1P1	0.037	1.04	(0.809-1.33)	0.09	0.77	0.809	1.33	1.04 (0.809-1.33)
MAPK10	0.093	1.1	(0.587-2.05)	0.08	0.771	0.587	2.05	1.1 (0.587-2.05)
HMGB2	0.00099	1	(0.994-1.01)	0.08	0.772	0.994	1.01	1 (0.994-1.01)
FGFR4	-0.0017	0.998	(0.987-1.01)	0.08	0.772	0.987	1.01	0.998 (0.987-1.01)
SLC31A2	-0.085	0.918	(0.514-1.64)	0.08	0.773	0.514	1.64	0.918 (0.514-1.64)
NUP205	0.0071	1.01	(0.96-1.06)	0.08	0.773	0.96	1.06	1.01 (0.96-1.06)
TFDP1	-0.0016	0.998	(0.987-1.01)	0.08	0.774	0.987	1.01	0.998 (0.987-1.01)
HMGN1	0.0033	1	(0.981-1.03)	0.08	0.774	0.981	1.03	1 (0.981-1.03)
UGCG	-0.0047	0.995	(0.964-1.03)	0.08	0.775	0.964	1.03	0.995 (0.964-1.03)
NEIL2	0.01	1.01	(0.943-1.08)	0.08	0.775	0.943	1.08	1.01 (0.943-1.08)
WDR76	-0.014	0.986	(0.892-1.09)	0.08	0.775	0.892	1.09	0.986 (0.892-1.09)
ATRIP	-0.35	0.707	(0.0648-7.71)	0.08	0.776	0.0648	7.71	0.707 (0.0648-7.71)
DHX9	-0.0031	0.997	(0.976-1.02)	0.08	0.776	0.976	1.02	0.997 (0.976-1.02)
CDC7	0.015	1.01	(0.917-1.12)	0.08	0.777	0.917	1.12	1.01 (0.917-1.12)
WRAP53	-0.024	0.976	(0.826-1.15)	0.08	0.777	0.826	1.15	0.976 (0.826-1.15)
PPIEL	0.034	1.03	(0.817-1.31)	0.08	0.777	0.817	1.31	1.03 (0.817-1.31)
PBX1	0.012	1.01	(0.93-1.1)	0.08	0.779	0.93	1.1	1.01 (0.93-1.1)
WNT5B	-0.025	0.976	(0.821-1.16)	0.08	0.779	0.821	1.16	0.976 (0.821-1.16)
RRM1	-0.0034	0.997	(0.973-1.02)	0.08	0.779	0.973	1.02	0.997 (0.973-1.02)
WDHD1	-0.02	0.981	(0.854-1.13)	0.08	0.78	0.854	1.13	0.981 (0.854-1.13)
ING2	0.013	1.01	(0.922-1.11)	0.08	0.78	0.922	1.11	1.01 (0.922-1.11)
RBBP8	-0.01	0.99	(0.922-1.06)	0.08	0.782	0.922	1.06	0.99 (0.922-1.06)
TAF1	0.0092	1.01	(0.945-1.08)	0.08	0.782	0.945	1.08	1.01 (0.945-1.08)
CYP51A1	0.016	1.02	(0.905-1.14)	0.08	0.783	0.905	1.14	1.02 (0.905-1.14)
CNOT9	-0.0084	0.992	(0.934-1.05)	0.08	0.784	0.934	1.05	0.992 (0.934-1.05)
PRKCB	-0.041	0.959	(0.714-1.29)	0.08	0.784	0.714	1.29	0.959 (0.714-1.29)
SUOX	0.012	1.01	(0.926-1.11)	0.07	0.786	0.926	1.11	1.01 (0.926-1.11)
POLR2C	0.0038	1	(0.977-1.03)	0.07	0.786	0.977	1.03	1 (0.977-1.03)
ATMIN	-0.011	0.989	(0.916-1.07)	0.07	0.787	0.916	1.07	0.989 (0.916-1.07)
CKS2	0.00048	1	(0.997-1)	0.07	0.787	0.997	1	1 (0.997-1)
TPT1	0.0001	1	(0.999-1)	0.07	0.787	0.999	1	1 (0.999-1)
NACC2	0.013	1.01	(0.921-1.12)	0.07	0.787	0.921	1.12	1.01 (0.921-1.12)
FOLH1	-0.033	0.967	(0.761-1.23)	0.07	0.788	0.761	1.23	0.967 (0.761-1.23)
TTC5	-0.036	0.965	(0.74-1.26)	0.07	0.79	0.74	1.26	0.965 (0.74-1.26)
CEP63	-0.033	0.968	(0.76-1.23)	0.07	0.791	0.76	1.23	0.968 (0.76-1.23)
EEF1E1	0.0099	1.01	(0.938-1.09)	0.07	0.792	0.938	1.09	1.01 (0.938-1.09)
RPA3	0.0059	1.01	(0.963-1.05)	0.07	0.793	0.963	1.05	1.01 (0.963-1.05)
COPS8	-0.0091	0.991	(0.926-1.06)	0.07	0.793	0.926	1.06	0.991 (0.926-1.06)
EP300	-0.0053	0.995	(0.956-1.03)	0.07	0.793	0.956	1.03	0.995 (0.956-1.03)
HSPB8	-0.0046	0.995	(0.962-1.03)	0.07	0.795	0.962	1.03	0.995 (0.962-1.03)
PLK1	-0.0035	0.996	(0.97-1.02)	0.07	0.797	0.97	1.02	0.996 (0.97-1.02)
PCLAF	0.0048	1	(0.968-1.04)	0.07	0.798	0.968	1.04	1 (0.968-1.04)
RFC3	-0.0035	0.997	(0.97-1.02)	0.07	0.799	0.97	1.02	0.997 (0.97-1.02)
FRZB	0.0034	1	(0.978-1.03)	0.06	0.8	0.978	1.03	1 (0.978-1.03)
PMS2P5	0.029	1.03	(0.821-1.29)	0.06	0.8	0.821	1.29	1.03 (0.821-1.29)
RBMS1	-0.0079	0.992	(0.932-1.06)	0.06	0.802	0.932	1.06	0.992 (0.932-1.06)
PCDH1	0.0028	1	(0.981-1.03)	0.06	0.802	0.981	1.03	1 (0.981-1.03)
MMP7	0.0004	1	(0.997-1)	0.06	0.804	0.997	1	1 (0.997-1)
BIRC5	-0.0027	0.997	(0.976-1.02)	0.06	0.806	0.976	1.02	0.997 (0.976-1.02)
FOXN3	-0.0082	0.992	(0.928-1.06)	0.06	0.807	0.928	1.06	0.992 (0.928-1.06)
PCK2	-0.0021	0.998	(0.982-1.01)	0.06	0.807	0.982	1.01	0.998 (0.982-1.01)
ASH2L	-0.0076	0.992	(0.934-1.05)	0.06	0.807	0.934	1.05	0.992 (0.934-1.05)
BTG3	-0.0047	0.995	(0.958-1.03)	0.06	0.809	0.958	1.03	0.995 (0.958-1.03)
TIMELESS	-0.0063	0.994	(0.944-1.05)	0.06	0.809	0.944	1.05	0.994 (0.944-1.05)
GSTA2	-0.16	0.856	(0.241-3.04)	0.06	0.81	0.241	3.04	0.856 (0.241-3.04)
HUWE1	-0.0031	0.997	(0.972-1.02)	0.06	0.81	0.972	1.02	0.997 (0.972-1.02)
INO80C	-0.021	0.979	(0.822-1.17)	0.06	0.81	0.822	1.17	0.979 (0.822-1.17)
RAD51C	0.031	1.03	(0.803-1.32)	0.06	0.811	0.803	1.32	1.03 (0.803-1.32)
ACTL6A	-0.0029	0.997	(0.973-1.02)	0.06	0.813	0.973	1.02	0.997 (0.973-1.02)
SFR1	-0.0098	0.99	(0.913-1.07)	0.06	0.813	0.913	1.07	0.99 (0.913-1.07)
NUP98	-0.0067	0.993	(0.939-1.05)	0.06	0.814	0.939	1.05	0.993 (0.939-1.05)
THOC5	-0.021	0.98	(0.824-1.16)	0.06	0.814	0.824	1.16	0.98 (0.824-1.16)
WDR33	0.014	1.01	(0.9-1.14)	0.06	0.814	0.9	1.14	1.01 (0.9-1.14)
PSMA1	-0.0031	0.997	(0.971-1.02)	0.06	0.814	0.971	1.02	0.997 (0.971-1.02)
DDX1	0.0024	1	(0.983-1.02)	0.05	0.815	0.983	1.02	1 (0.983-1.02)
PLAGL1	-0.0084	0.992	(0.924-1.06)	0.05	0.817	0.924	1.06	0.992 (0.924-1.06)
AQR	-0.015	0.985	(0.867-1.12)	0.05	0.817	0.867	1.12	0.985 (0.867-1.12)
ALDH9A1	-0.0026	0.997	(0.976-1.02)	0.05	0.818	0.976	1.02	0.997 (0.976-1.02)
ZBTB40	-0.017	0.983	(0.848-1.14)	0.05	0.82	0.848	1.14	0.983 (0.848-1.14)
SESN2	0.0081	1.01	(0.94-1.08)	0.05	0.82	0.94	1.08	1.01 (0.94-1.08)
SLX1A	-0.72	0.486	(0.00097-243)	0.05	0.82	0.00097	243	0.486 (0.00097-243)
RBBP5	-0.011	0.989	(0.895-1.09)	0.05	0.822	0.895	1.09	0.989 (0.895-1.09)
BLM	-0.021	0.979	(0.811-1.18)	0.05	0.824	0.811	1.18	0.979 (0.811-1.18)
WDR70	0.018	1.02	(0.867-1.2)	0.05	0.826	0.867	1.2	1.02 (0.867-1.2)
ACTN4	-0.00039	1	(0.996-1)	0.05	0.826	0.996	1	1 (0.996-1)
TDP2	0.0013	1	(0.989-1.01)	0.05	0.827	0.989	1.01	1 (0.989-1.01)
NAP1L1	-0.0024	0.998	(0.976-1.02)	0.05	0.828	0.976	1.02	0.998 (0.976-1.02)
CNOT1	-0.0023	0.998	(0.977-1.02)	0.05	0.83	0.977	1.02	0.998 (0.977-1.02)
DTL	0.0086	1.01	(0.932-1.09)	0.05	0.831	0.932	1.09	1.01 (0.932-1.09)
SCMH1	0.007	1.01	(0.945-1.07)	0.05	0.831	0.945	1.07	1.01 (0.945-1.07)
SLX4	-0.042	0.959	(0.649-1.42)	0.05	0.832	0.649	1.42	0.959 (0.649-1.42)
UBA52	0.00032	1	(0.997-1)	0.04	0.832	0.997	1	1 (0.997-1)
POLR2I	-0.0011	0.999	(0.989-1.01)	0.04	0.833	0.989	1.01	0.999 (0.989-1.01)
NEK11	-0.028	0.972	(0.75-1.26)	0.04	0.833	0.75	1.26	0.972 (0.75-1.26)
PCNA	-0.00031	1	(0.997-1)	0.04	0.834	0.997	1	1 (0.997-1)
PALB2	0.014	1.01	(0.893-1.15)	0.04	0.834	0.893	1.15	1.01 (0.893-1.15)
ARPC5	-0.0029	0.997	(0.97-1.02)	0.04	0.835	0.97	1.02	0.997 (0.97-1.02)
XPC	0.0092	1.01	(0.925-1.1)	0.04	0.837	0.925	1.1	1.01 (0.925-1.1)
MIF	-0.0005	0.999	(0.995-1)	0.04	0.837	0.995	1	0.999 (0.995-1)
STAG2	-0.0024	0.998	(0.975-1.02)	0.04	0.838	0.975	1.02	0.998 (0.975-1.02)
UBE2T	-0.0016	0.998	(0.983-1.01)	0.04	0.839	0.983	1.01	0.998 (0.983-1.01)
DCLRE1B	-0.016	0.985	(0.847-1.14)	0.04	0.839	0.847	1.14	0.985 (0.847-1.14)
CBX8	0.011	1.01	(0.907-1.13)	0.04	0.84	0.907	1.13	1.01 (0.907-1.13)
RBL2	-0.0048	0.995	(0.949-1.04)	0.04	0.84	0.949	1.04	0.995 (0.949-1.04)
PHC2	0.0023	1	(0.98-1.03)	0.04	0.841	0.98	1.03	1 (0.98-1.03)
SFN	-0.0002	1	(0.998-1)	0.04	0.841	0.998	1	1 (0.998-1)
PSMB10	-0.0011	0.999	(0.989-1.01)	0.04	0.842	0.989	1.01	0.999 (0.989-1.01)
PLCL1	0.024	1.02	(0.808-1.3)	0.04	0.842	0.808	1.3	1.02 (0.808-1.3)
PSME1	-0.00033	1	(0.996-1)	0.04	0.842	0.996	1	1 (0.996-1)
GTF2H1	-0.01	0.99	(0.894-1.1)	0.04	0.843	0.894	1.1	0.99 (0.894-1.1)
NABP2	-0.0023	0.998	(0.975-1.02)	0.04	0.843	0.975	1.02	0.998 (0.975-1.02)
PYHIN1	0.054	1.06	(0.62-1.79)	0.04	0.843	0.62	1.79	1.06 (0.62-1.79)
USP47	-0.0092	0.991	(0.904-1.09)	0.04	0.844	0.904	1.09	0.991 (0.904-1.09)
STAT5B	-0.0061	0.994	(0.935-1.06)	0.04	0.844	0.935	1.06	0.994 (0.935-1.06)
NFYB	0.0083	1.01	(0.928-1.1)	0.04	0.845	0.928	1.1	1.01 (0.928-1.1)
ELOB	-0.00018	1	(0.998-1)	0.04	0.847	0.998	1	1 (0.998-1)
RAD54B	-0.032	0.968	(0.699-1.34)	0.04	0.847	0.699	1.34	0.968 (0.699-1.34)
CDK13	0.0062	1.01	(0.944-1.07)	0.04	0.848	0.944	1.07	1.01 (0.944-1.07)
PRMT6	-0.006	0.994	(0.935-1.06)	0.04	0.848	0.935	1.06	0.994 (0.935-1.06)
NUP133	0.0066	1.01	(0.94-1.08)	0.04	0.85	0.94	1.08	1.01 (0.94-1.08)
ATAD5	-0.0088	0.991	(0.905-1.09)	0.04	0.85	0.905	1.09	0.991 (0.905-1.09)
RAD18	-0.011	0.989	(0.883-1.11)	0.04	0.851	0.883	1.11	0.989 (0.883-1.11)
CHEK2	0.0084	1.01	(0.923-1.1)	0.04	0.851	0.923	1.1	1.01 (0.923-1.1)
BCL3	0.0017	1	(0.985-1.02)	0.04	0.851	0.985	1.02	1 (0.985-1.02)
ABCC1	0.0039	1	(0.964-1.05)	0.03	0.852	0.964	1.05	1 (0.964-1.05)
BRCA1	-0.0097	0.99	(0.893-1.1)	0.03	0.854	0.893	1.1	0.99 (0.893-1.1)
POLB	-0.0069	0.993	(0.923-1.07)	0.03	0.854	0.923	1.07	0.993 (0.923-1.07)
INTS7	0.0081	1.01	(0.922-1.1)	0.03	0.859	0.922	1.1	1.01 (0.922-1.1)
SUPT16H	0.0025	1	(0.975-1.03)	0.03	0.859	0.975	1.03	1 (0.975-1.03)
SLC9A6	0.01	1.01	(0.901-1.13)	0.03	0.86	0.901	1.13	1.01 (0.901-1.13)
CDC25A	-0.007	0.993	(0.919-1.07)	0.03	0.86	0.919	1.07	0.993 (0.919-1.07)
FASLG	-0.032	0.968	(0.676-1.39)	0.03	0.86	0.676	1.39	0.968 (0.676-1.39)
RHOB	-0.00034	1	(0.996-1)	0.03	0.861	0.996	1	1 (0.996-1)
PRKAB2	-0.0055	0.995	(0.935-1.06)	0.03	0.862	0.935	1.06	0.995 (0.935-1.06)
KMT5B	-0.0086	0.991	(0.899-1.09)	0.03	0.863	0.899	1.09	0.991 (0.899-1.09)
HELQ	-0.022	0.978	(0.763-1.25)	0.03	0.863	0.763	1.25	0.978 (0.763-1.25)
PSEN1	-0.0058	0.994	(0.93-1.06)	0.03	0.864	0.93	1.06	0.994 (0.93-1.06)
GPS1	0.002	1	(0.979-1.03)	0.03	0.865	0.979	1.03	1 (0.979-1.03)
BAZ1B	0.0031	1	(0.968-1.04)	0.03	0.865	0.968	1.04	1 (0.968-1.04)
BCL2L2	0.0051	1.01	(0.947-1.07)	0.03	0.866	0.947	1.07	1.01 (0.947-1.07)
UBE2L6	0.00052	1	(0.994-1.01)	0.03	0.866	0.994	1.01	1 (0.994-1.01)
WAC	0.0042	1	(0.956-1.05)	0.03	0.866	0.956	1.05	1 (0.956-1.05)
ADAMTS1	0.0046	1	(0.953-1.06)	0.03	0.867	0.953	1.06	1 (0.953-1.06)
C3AR1	-0.0038	0.996	(0.953-1.04)	0.03	0.867	0.953	1.04	0.996 (0.953-1.04)
SPRTN	-0.019	0.981	(0.786-1.23)	0.03	0.868	0.786	1.23	0.981 (0.786-1.23)
LDLR	0.0016	1	(0.983-1.02)	0.03	0.868	0.983	1.02	1 (0.983-1.02)
TRAF6	-0.009	0.991	(0.89-1.1)	0.03	0.869	0.89	1.1	0.991 (0.89-1.1)
CLEC4M	-0.2	0.82	(0.0777-8.65)	0.03	0.869	0.0777	8.65	0.82 (0.0777-8.65)
TNIP1	0.0017	1	(0.981-1.02)	0.03	0.869	0.981	1.02	1 (0.981-1.02)
MAP3K4	-0.012	0.988	(0.855-1.14)	0.03	0.869	0.855	1.14	0.988 (0.855-1.14)
COPS2	-0.0045	0.995	(0.943-1.05)	0.03	0.87	0.943	1.05	0.995 (0.943-1.05)
ZBTB7A	-0.0033	0.997	(0.957-1.04)	0.03	0.873	0.957	1.04	0.997 (0.957-1.04)
HNRNPD	0.0017	1	(0.981-1.02)	0.03	0.873	0.981	1.02	1 (0.981-1.02)
PNKP	0.0045	1	(0.95-1.06)	0.03	0.873	0.95	1.06	1 (0.95-1.06)
MORF4L1	-0.002	0.998	(0.974-1.02)	0.02	0.875	0.974	1.02	0.998 (0.974-1.02)
PLAU	0.00073	1	(0.992-1.01)	0.02	0.875	0.992	1.01	1 (0.992-1.01)
PSMC2	0.0017	1	(0.981-1.02)	0.02	0.876	0.981	1.02	1 (0.981-1.02)
POLR2A	-0.00055	0.999	(0.992-1.01)	0.02	0.876	0.992	1.01	0.999 (0.992-1.01)
TP53I3	-0.0027	0.997	(0.964-1.03)	0.02	0.876	0.964	1.03	0.997 (0.964-1.03)
STAT1	-0.0005	1	(0.993-1.01)	0.02	0.877	0.993	1.01	1 (0.993-1.01)
EIF5A	0.00018	1	(0.998-1)	0.02	0.877	0.998	1	1 (0.998-1)
MCM4	-0.0014	0.999	(0.981-1.02)	0.02	0.878	0.981	1.02	0.999 (0.981-1.02)
LDHD	0.0035	1	(0.958-1.05)	0.02	0.881	0.958	1.05	1 (0.958-1.05)
ALKBH7	0.0006	1	(0.993-1.01)	0.02	0.881	0.993	1.01	1 (0.993-1.01)
CSDE1	-0.00062	0.999	(0.991-1.01)	0.02	0.883	0.991	1.01	0.999 (0.991-1.01)
MRE11	0.0056	1.01	(0.933-1.08)	0.02	0.884	0.933	1.08	1.01 (0.933-1.08)
ESD	-0.00097	0.999	(0.986-1.01)	0.02	0.885	0.986	1.01	0.999 (0.986-1.01)
PSMA4	-0.0019	0.998	(0.973-1.02)	0.02	0.886	0.973	1.02	0.998 (0.973-1.02)
PSMD10	-0.0019	0.998	(0.972-1.02)	0.02	0.887	0.972	1.02	0.998 (0.972-1.02)
WDR48	-0.0071	0.993	(0.901-1.09)	0.02	0.887	0.901	1.09	0.993 (0.901-1.09)
AKAP12	-0.002	0.998	(0.971-1.03)	0.02	0.887	0.971	1.03	0.998 (0.971-1.03)
TPR	0.0032	1	(0.96-1.05)	0.02	0.888	0.96	1.05	1 (0.96-1.05)
ACKR3	0.0024	1	(0.97-1.04)	0.02	0.888	0.97	1.04	1 (0.97-1.04)
ARPC3	-0.00058	0.999	(0.991-1.01)	0.02	0.888	0.991	1.01	0.999 (0.991-1.01)
PARP3	-0.0034	0.997	(0.95-1.05)	0.02	0.889	0.95	1.05	0.997 (0.95-1.05)
MSH6	-0.0074	0.993	(0.894-1.1)	0.02	0.889	0.894	1.1	0.993 (0.894-1.1)
UBE2L3	-0.0023	0.998	(0.967-1.03)	0.02	0.889	0.967	1.03	0.998 (0.967-1.03)
ATP6V0A1	-0.0065	0.994	(0.906-1.09)	0.02	0.889	0.906	1.09	0.994 (0.906-1.09)
PMAIP1	0.0032	1	(0.958-1.05)	0.02	0.891	0.958	1.05	1 (0.958-1.05)
RAD23B	-0.0013	0.999	(0.98-1.02)	0.02	0.893	0.98	1.02	0.999 (0.98-1.02)
NUDT16L1	-0.0014	0.999	(0.978-1.02)	0.02	0.894	0.978	1.02	0.999 (0.978-1.02)
CDK2	0.0036	1	(0.951-1.06)	0.02	0.896	0.951	1.06	1 (0.951-1.06)
LIG3	0.012	1.01	(0.841-1.22)	0.02	0.897	0.841	1.22	1.01 (0.841-1.22)
COL3A1	-3.1e-05	1	(0.999-1)	0.02	0.899	0.999	1	1 (0.999-1)
NUDT3	0.012	1.01	(0.838-1.22)	0.02	0.9	0.838	1.22	1.01 (0.838-1.22)
TOPBP1	0.0037	1	(0.946-1.07)	0.02	0.902	0.946	1.07	1 (0.946-1.07)
POFUT1	-0.00067	0.999	(0.988-1.01)	0.01	0.905	0.988	1.01	0.999 (0.988-1.01)
PMS2P6	0.1	1.11	(0.198-6.23)	0.01	0.906	0.198	6.23	1.11 (0.198-6.23)
ELOC	0.0024	1	(0.963-1.04)	0.01	0.906	0.963	1.04	1 (0.963-1.04)
AKAP6	-0.039	0.962	(0.492-1.88)	0.01	0.909	0.492	1.88	0.962 (0.492-1.88)
TOP2A	0.0007	1	(0.989-1.01)	0.01	0.91	0.989	1.01	1 (0.989-1.01)
PSMA2	-0.0053	0.995	(0.908-1.09)	0.01	0.91	0.908	1.09	0.995 (0.908-1.09)
HSD17B10	-0.0002	1	(0.996-1)	0.01	0.912	0.996	1	1 (0.996-1)
HPF1	-0.0027	0.997	(0.95-1.05)	0.01	0.912	0.95	1.05	0.997 (0.95-1.05)
UBE2U	-0.27	0.766	(0.00656-89.5)	0.01	0.913	0.00656	89.5	0.766 (0.00656-89.5)
PRIMPOL	-0.0083	0.992	(0.854-1.15)	0.01	0.914	0.854	1.15	0.992 (0.854-1.15)
MT1H	0.00047	1	(0.992-1.01)	0.01	0.914	0.992	1.01	1 (0.992-1.01)
FBXO6	0.0016	1	(0.972-1.03)	0.01	0.915	0.972	1.03	1 (0.972-1.03)
PTGFRN	-0.0016	0.998	(0.97-1.03)	0.01	0.915	0.97	1.03	0.998 (0.97-1.03)
EPC2	0.0048	1	(0.92-1.1)	0.01	0.915	0.92	1.1	1 (0.92-1.1)
XRCC6	-0.00032	1	(0.994-1.01)	0.01	0.916	0.994	1.01	1 (0.994-1.01)
RNF111	-0.0074	0.993	(0.866-1.14)	0.01	0.916	0.866	1.14	0.993 (0.866-1.14)
HCLS1	0.0027	1	(0.953-1.06)	0.01	0.916	0.953	1.06	1 (0.953-1.06)
FIGN	-0.052	0.949	(0.358-2.52)	0.01	0.917	0.358	2.52	0.949 (0.358-2.52)
MARF1	0.004	1	(0.932-1.08)	0.01	0.917	0.932	1.08	1 (0.932-1.08)
CHAF1B	0.0061	1.01	(0.894-1.13)	0.01	0.918	0.894	1.13	1.01 (0.894-1.13)
TIPIN	-0.0071	0.993	(0.866-1.14)	0.01	0.919	0.866	1.14	0.993 (0.866-1.14)
NRK	-0.019	0.981	(0.678-1.42)	0.01	0.92	0.678	1.42	0.981 (0.678-1.42)
RPAIN	0.0074	1.01	(0.873-1.16)	0.01	0.92	0.873	1.16	1.01 (0.873-1.16)
DCTPP1	-0.00034	1	(0.993-1.01)	0.01	0.922	0.993	1.01	1 (0.993-1.01)
HNRNPK	-0.00037	1	(0.992-1.01)	0.01	0.923	0.992	1.01	1 (0.992-1.01)
SUSD6	0.002	1	(0.963-1.04)	0.01	0.923	0.963	1.04	1 (0.963-1.04)
ARID3A	-0.0017	0.998	(0.965-1.03)	0.01	0.923	0.965	1.03	0.998 (0.965-1.03)
CHD1L	0.0018	1	(0.965-1.04)	0.01	0.923	0.965	1.04	1 (0.965-1.04)
S100A11	-2.7e-05	1	(0.999-1)	0.01	0.923	0.999	1	1 (0.999-1)
THOC1	0.0078	1.01	(0.856-1.19)	0.01	0.925	0.856	1.19	1.01 (0.856-1.19)
TP63	-0.013	0.987	(0.746-1.31)	0.01	0.925	0.746	1.31	0.987 (0.746-1.31)
DDIAS	0.0076	1.01	(0.86-1.18)	0.01	0.925	0.86	1.18	1.01 (0.86-1.18)
SERPINE2	0.00084	1	(0.983-1.02)	0.01	0.926	0.983	1.02	1 (0.983-1.02)
MCM5	-0.0014	0.999	(0.969-1.03)	0.01	0.927	0.969	1.03	0.999 (0.969-1.03)
WNT6	-0.0091	0.991	(0.81-1.21)	0.01	0.929	0.81	1.21	0.991 (0.81-1.21)
PTPRN2	-0.00097	0.999	(0.977-1.02)	0.01	0.931	0.977	1.02	0.999 (0.977-1.02)
HSF2	0.0054	1.01	(0.891-1.13)	0.01	0.931	0.891	1.13	1.01 (0.891-1.13)
EXO1	0.0047	1	(0.904-1.12)	0.01	0.931	0.904	1.12	1 (0.904-1.12)
PDGFRL	0.0051	1.01	(0.895-1.13)	0.01	0.931	0.895	1.13	1.01 (0.895-1.13)
E2F8	0.0048	1	(0.897-1.13)	0.01	0.934	0.897	1.13	1 (0.897-1.13)
SLF2	-0.0035	0.997	(0.917-1.08)	0.01	0.935	0.917	1.08	0.997 (0.917-1.08)
POLR2F	-0.26	0.769	(0.00126-471)	0.01	0.936	0.00126	471	0.769 (0.00126-471)
CCND1	0.00033	1	(0.992-1.01)	0.01	0.937	0.992	1.01	1 (0.992-1.01)
DYRK1A	0.0029	1	(0.93-1.08)	0.01	0.94	0.93	1.08	1 (0.93-1.08)
RAD17	0.0041	1	(0.898-1.12)	0.01	0.942	0.898	1.12	1 (0.898-1.12)
EGF	-0.0069	0.993	(0.825-1.2)	0.01	0.942	0.825	1.2	0.993 (0.825-1.2)
CD8A	0.0028	1	(0.925-1.09)	0	0.945	0.925	1.09	1 (0.925-1.09)
SEMA3B	-0.001	0.999	(0.97-1.03)	0	0.946	0.97	1.03	0.999 (0.97-1.03)
TRRAP	0.0019	1	(0.948-1.06)	0	0.947	0.948	1.06	1 (0.948-1.06)
MASTL	0.0031	1	(0.916-1.1)	0	0.947	0.916	1.1	1 (0.916-1.1)
CDC25B	0.00027	1	(0.992-1.01)	0	0.948	0.992	1.01	1 (0.992-1.01)
SEC22A	-0.0072	0.993	(0.799-1.23)	0	0.948	0.799	1.23	0.993 (0.799-1.23)
INIP	0.0028	1	(0.92-1.09)	0	0.949	0.92	1.09	1 (0.92-1.09)
AP3B2	-0.0074	0.993	(0.782-1.26)	0	0.951	0.782	1.26	0.993 (0.782-1.26)
ORC3	-0.0023	0.998	(0.927-1.07)	0	0.951	0.927	1.07	0.998 (0.927-1.07)
MCM8	-0.0025	0.997	(0.917-1.08)	0	0.953	0.917	1.08	0.997 (0.917-1.08)
DCLRE1A	0.0032	1	(0.9-1.12)	0	0.955	0.9	1.12	1 (0.9-1.12)
BCL6	0.0016	1	(0.946-1.06)	0	0.956	0.946	1.06	1 (0.946-1.06)
GCLC	-0.0022	0.998	(0.918-1.08)	0	0.959	0.918	1.08	0.998 (0.918-1.08)
EIF3L	-0.00034	1	(0.987-1.01)	0	0.959	0.987	1.01	1 (0.987-1.01)
C9orf116	-0.0058	0.994	(0.793-1.25)	0	0.96	0.793	1.25	0.994 (0.793-1.25)
BABAM2	-0.0017	0.998	(0.934-1.07)	0	0.96	0.934	1.07	0.998 (0.934-1.07)
UVRAG	-0.0047	0.995	(0.83-1.19)	0	0.96	0.83	1.19	0.995 (0.83-1.19)
NTHL1	0.00051	1	(0.981-1.02)	0	0.96	0.981	1.02	1 (0.981-1.02)
TCF7	-0.0016	0.998	(0.936-1.06)	0	0.96	0.936	1.06	0.998 (0.936-1.06)
SOD1	-8.5e-05	1	(0.996-1)	0	0.962	0.996	1	1 (0.996-1)
BMI1	0.0012	1	(0.953-1.05)	0	0.963	0.953	1.05	1 (0.953-1.05)
MOK	-0.0068	0.993	(0.74-1.33)	0	0.964	0.74	1.33	0.993 (0.74-1.33)
TERF1	0.0035	1	(0.86-1.17)	0	0.965	0.86	1.17	1 (0.86-1.17)
GTF2I	-0.0027	0.997	(0.883-1.13)	0	0.965	0.883	1.13	0.997 (0.883-1.13)
IRF2	0.0011	1	(0.953-1.05)	0	0.966	0.953	1.05	1 (0.953-1.05)
ZSWIM7	0.002	1	(0.911-1.1)	0	0.967	0.911	1.1	1 (0.911-1.1)
MT1X	-0.00043	1	(0.979-1.02)	0	0.968	0.979	1.02	1 (0.979-1.02)
FMN2	-0.026	0.974	(0.261-3.64)	0	0.969	0.261	3.64	0.974 (0.261-3.64)
UBR5	-0.00066	0.999	(0.964-1.04)	0	0.972	0.964	1.04	0.999 (0.964-1.04)
ALDH3B2	0.0021	1	(0.883-1.14)	0	0.974	0.883	1.14	1 (0.883-1.14)
RINT1	-0.0016	0.998	(0.902-1.11)	0	0.975	0.902	1.11	0.998 (0.902-1.11)
ACTR5	0.0011	1	(0.938-1.07)	0	0.975	0.938	1.07	1 (0.938-1.07)
RNF2	-0.0013	0.999	(0.917-1.09)	0	0.976	0.917	1.09	0.999 (0.917-1.09)
GLRX2	-0.00092	0.999	(0.937-1.06)	0	0.977	0.937	1.06	0.999 (0.937-1.06)
POLR2G	-0.00018	1	(0.987-1.01)	0	0.978	0.987	1.01	1 (0.987-1.01)
PSME2	-9.5e-05	1	(0.993-1.01)	0	0.979	0.993	1.01	1 (0.993-1.01)
NUP160	-0.00096	0.999	(0.93-1.07)	0	0.979	0.93	1.07	0.999 (0.93-1.07)
HMGA2	0.0014	1	(0.9-1.11)	0	0.98	0.9	1.11	1 (0.9-1.11)
PMS2P11	-0.032	0.969	(0.0621-15.1)	0	0.982	0.0621	15.1	0.969 (0.0621-15.1)
DCLRE1C	0.0017	1	(0.857-1.17)	0	0.983	0.857	1.17	1 (0.857-1.17)
SPRED3	-0.0055	0.995	(0.583-1.7)	0	0.984	0.583	1.7	0.995 (0.583-1.7)
TFIP11	0.0014	1	(0.867-1.16)	0	0.984	0.867	1.16	1 (0.867-1.16)
RAD54L	-0.00087	0.999	(0.912-1.09)	0	0.985	0.912	1.09	0.999 (0.912-1.09)
OAZ1	3.8e-05	1	(0.996-1)	0	0.985	0.996	1	1 (0.996-1)
PRSS23	-0.00016	1	(0.983-1.02)	0	0.985	0.983	1.02	1 (0.983-1.02)
LAMTOR5	0.00014	1	(0.983-1.02)	0	0.987	0.983	1.02	1 (0.983-1.02)
PRMT1	-6.2e-05	1	(0.992-1.01)	0	0.987	0.992	1.01	1 (0.992-1.01)
SPO11	-0.016	0.984	(0.105-9.19)	0	0.989	0.105	9.19	0.984 (0.105-9.19)
MCM6	0.00016	1	(0.974-1.03)	0	0.99	0.974	1.03	1 (0.974-1.03)
UHRF1	-0.00045	1	(0.934-1.07)	0	0.99	0.934	1.07	1 (0.934-1.07)
RPS3	6.3e-06	1	(0.999-1)	0	0.99	0.999	1	1 (0.999-1)
ELF4	0.00017	1	(0.971-1.03)	0	0.991	0.971	1.03	1 (0.971-1.03)
CDKN2AIP	-0.00032	1	(0.945-1.06)	0	0.991	0.945	1.06	1 (0.945-1.06)
MSH2	-0.00028	1	(0.951-1.05)	0	0.991	0.951	1.05	1 (0.951-1.05)
ACTB	1.6e-06	1	(1-1)	0	0.991	1	1	1 (1-1)
NUP35	0.00063	1	(0.889-1.13)	0	0.992	0.889	1.13	1 (0.889-1.13)
WDR4	-0.00024	1	(0.957-1.04)	0	0.992	0.957	1.04	1 (0.957-1.04)
ARNT	-0.00034	1	(0.922-1.08)	0	0.993	0.922	1.08	1 (0.922-1.08)
OTUB1	-8.4e-05	1	(0.977-1.02)	0	0.994	0.977	1.02	1 (0.977-1.02)
RAD1	-0.00039	1	(0.907-1.1)	0	0.994	0.907	1.1	1 (0.907-1.1)
NPLOC4	-0.00019	1	(0.95-1.05)	0	0.994	0.95	1.05	1 (0.95-1.05)
CYCS	2e-05	1	(0.992-1.01)	0	0.996	0.992	1.01	1 (0.992-1.01)
SERPINB2	0.0002	1	(0.919-1.09)	0	0.996	0.919	1.09	1 (0.919-1.09)
SSBP1	8e-05	1	(0.97-1.03)	0	0.996	0.97	1.03	1 (0.97-1.03)
IMMP2L	-0.00021	1	(0.924-1.08)	0	0.996	0.924	1.08	1 (0.924-1.08)
MDC1	-0.00021	1	(0.921-1.09)	0	0.996	0.921	1.09	1 (0.921-1.09)
TOPORS	-0.00028	1	(0.903-1.11)	0	0.996	0.903	1.11	1 (0.903-1.11)
GADD45G	-5.5e-05	1	(0.974-1.03)	0	0.997	0.974	1.03	1 (0.974-1.03)
ACHE	-7e-05	1	(0.956-1.05)	0	0.998	0.956	1.05	1 (0.956-1.05)
YWHAH	-3.9e-06	1	(0.991-1.01)	0	0.999	0.991	1.01	1 (0.991-1.01)
PPP5C	9.7e-06	1	(0.941-1.06)	0	1	0.941	1.06	1 (0.941-1.06)
GTF2F2	1.6e-06	1	(0.974-1.03)	0	1	0.974	1.03	1 (0.974-1.03)
TREX1	NA	NA	(NA-NA)	NA	NA	NA	NA	NA (NA-NA)
PTPRCAP	NA	NA	(NA-NA)	NA	NA	NA	NA	NA (NA-NA)
